# Supplementary material for: Thermal decomposition of graphene oxyradicals under the influence of an embedded five-membered ring
Source: Royal Society of Chemistry journal article supplement (doi:10.1039/c6cp00917d), 2016-01-01
Supplement: c6cp00917d1.pdf [file c6cp00917d1.pdf]

Supporting Information for

## Thermal decomposition of graphene oxyradicals under the influence of an embedded five-membered ring

Xiaoqing You,<sup>a, b\*</sup> Hongmiao Wang,<sup>a, b</sup> Hong-Bo Zhang,<sup>a, b</sup> Michael J. Pilling,<sup>c\*</sup>

<sup>a</sup>Center for Combustion Energy, Tsinghua University, Beijing, 100084, China

<sup>b</sup>Key Laboratory for Thermal Science and Power Engineering of Ministry of Education, Tsinghua University, Beijing 100084, China

<sup>c</sup>School of Chemistry, University of Leeds, Leeds LS2 9JT, UK

### In this supporting information, we present:

- **Table S1.** Total energies, relative energies, zero-point energies, expectation values of S2 operator (projected values are in parentheses), vibrational frequencies, rotational constants for all optimized structures at B3LYP/6-311G(d,p) level in this work for oxyradicals a-g.
- **Table S2.** Cartesian coordinates of optimized structures at B3LYP/6-311G(d,p) level for oxyradicals a-g.
- **Table S3.** Rate coefficients (units: s<sup>-1</sup>) of product formation from oxyradical a.
- **Table S4.** Rate coefficients (units: s<sup>-1</sup>) of product formation from oxyradical b.
- **Table S5.** Rate coefficients (units: s<sup>-1</sup>) of product formation from oxyradical c.
- **Table S6.** Rate coefficients (units: s<sup>-1</sup>) of product formation from oxyradical d.
- **Table S7.** Rate coefficients (units: s<sup>-1</sup>) of product formation from oxyradical e.
- **Table S8.** Rate coefficients (units: s<sup>-1</sup>) of product formation from oxyradical f.
- **Table S9.** Rate coefficients (units: s<sup>-1</sup>) of product formation from oxyradical g.
- **Figure S1.** Potential energy surface of oxyradical c calculated at B3LYP/6-311G(d,p) level at 0 K (units: kcal/mol).
- **Figure S2.** Potential energy surface of oxyradical d calculated at B3LYP/6-311G(d,p) level at 0 K (units: kcal/mol).
- **Figure S3.** Potential energy surface of oxyradical e calculated at B3LYP/6-311G(d,p) level at 0 K (units: kcal/mol).
- **Figure S4.** ln(concentration fraction)s and concentrations as functions of time for oxyradical g at 0.1 atm, (a) 1500 K, (b) 2000 K, (c) 2500 K.
- **Figure S5.** Comparison of concentration profiles of the reactant (oxyradical g) from the master equation modelling with those from the fitting formula  $e^{-kt}$ , where  $k$  is the effective rate constant derived from three different methods.
- **Figure S6.** Densities of states as functions of energy, (a) f, (b) f5.
- **Figure S7.** Microcanonical rate constants for isomerization from species f to f5, f5 to f, f5 to f3, and f3 to f4.
- **Figure S8.** Concentration profiles from the kinetic modelling at 1500 K, (a)  $x_{O_2}=0.001$ , (b)  $x_{O_2}=0.01$ , (c)  $x_{O_2}=0.1$ .
- **Figure S9.** Concentration profiles from the kinetic modelling at 2000 K, (a)  $x_{O_2}=0.001$ , (b)  $x_{O_2}=0.01$ , (c)  $x_{O_2}=0.1$ .

- **Figure S10.** Concentration profiles from the kinetic modelling at 2500 K, (a)  $x_{O_2}=0.001$ , (b)  $x_{O_2}=0.01$ , (c)  $x_{O_2}=0.1$ .
- **Figure S11.** Concentration profiles from the kinetic modelling of oxyradical a at 0.1 atm, (a) 1500 K, (b) 2500 K, (c) 2500 K.
- **Figure S12.** Concentration profiles from the kinetic modelling of oxyradical a at 10 atm, (a) 1500 K, (b) 2500 K, (c) 2500 K.

**Table S1.** Total energies, relative energies, zero-point energies, expectation values of  $S^2$  operator (projected values are in parentheses), vibrational frequencies, rotational constants for all optimized structures at B3LYP/6-311G(d,p) level in this work for oxyradicals a-g.

| Oxyradical a |                         |                            |                           |                       |                                                                                                                                                                                                                                                                                                                                                                                                                                                                                                                                                    |                               |
|--------------|-------------------------|----------------------------|---------------------------|-----------------------|----------------------------------------------------------------------------------------------------------------------------------------------------------------------------------------------------------------------------------------------------------------------------------------------------------------------------------------------------------------------------------------------------------------------------------------------------------------------------------------------------------------------------------------------------|-------------------------------|
| Species      | Total Energy (hartrees) | Relative Energy (kcal/mol) | ZPE (unscaled) (hartrees) | $\langle S^2 \rangle$ | Frequencies (unscaled) (cm <sup>-1</sup> )                                                                                                                                                                                                                                                                                                                                                                                                                                                                                                         | Rotational constants (GHz)    |
| a            | -766.51403              | 0.0                        | 0.20972                   | 0.79(0.75)            | 62.2 95.3 138.2 208.3 212.8 280.7 291.4 323.4 392.1<br>410.7 425.0 428.6 465.2 473.3 533.7 540.5 557.2 577.4<br>589.7 605.1 636.5 649.9 658.0 690.1 728.7 767.6 769.5<br>774.5 817.9 827.8 837.1 846.8 858.7 897.9 939.3 961.7<br>963.2 973.2 991.8 994.5 1030.1 1035.0 1074.7 1140.6<br>1146.2 1156.9 1178.4 1199.6 1215.4 1225.7 1246.0<br>1274.0 1323.8 1342.1 1385.1 1395.1 1415.4 1425.6<br>1436.6 1467.3 1475.7 1478.9 1506.4 1528.4 1575.9<br>1606.8 1637.4 1670.6 1694.2 3159.5 3160.4 3162.3<br>3165.1 3177.2 3178.6 3181.0 3188.8 3199.0 | 0.59918<br>0.44183<br>0.25431 |
| a3           | -766.40214              | 70.2                       | 0.20694                   | 0.76(0.75)            | 41.1* 59.6 111.9 145.7 173.1 211.9 278.6 291.9 315.9<br>340.8 395.8 453.9 457.8 465.9 490.4 525.5 551.8 589.9<br>590.8 600.0 618.0 641.7 664.1 674.1 686.1 737.5 746.3<br>760.9 790.4 808.2 817.6 829.7 842.8 872.5 913.1 919.2<br>950.1 963.2 963.8 979.8 983.7 1038.5 1066.8 1094.7<br>1104.4 1119.0 1159.2 1160.8 1192.6 1204.8 1215.9<br>1236.1 1261.3 1280.2 1366.2 1384.4 1399.2 1424.6<br>1442.7 1452.4 1494.7 1504.0 1512.5 1582.5 1595.5<br>1622.3 1650.5 1706.8 1903.8 2994.8 3157.3 3158.4<br>3162.1 3174.4 3177.2 3180.1 3188.5 3213.2 | 0.55981<br>0.46423<br>0.26918 |
| a5           | -766.40373              | 69.2                       | 0.20626                   | 0.80(0.75)            | 44.6 66.2 91.6 106.4 187.1 189.2 216.7 269.3 279.7<br>299.3 357.7 420.0 441.8 449.1 495.8 513.1 529.1 532.5<br>554.1 564.7 590.4 601.1 640.3 651.6 676.3 676.9 701.4<br>726.3 762.6 784.1 796.5 824.9 829.7 837.0 879.5 915.4<br>958.4 958.8 969.7 977.5 1014.8 1045.4 1050.5 1077.0<br>1140.4 1157.7 1182.4 1192.2 1215.4 1225.8 1231.3<br>1240.1 1276.2 1333.3 1359.3 1387.1 1394.1 1432.0<br>1455.6 1464.0 1472.7 1501.9 1518.9 1560.8 1596.8<br>1625.3 1643.0 1690.7 2203.7 3133.2 3155.7 3156.3<br>3161.2 3165.4 3173.1 3174.5 3177.9 3185.1  | 0.74140<br>0.25363<br>0.18898 |
| a6           | -766.43472              | 49.8                       | 0.20515                   | 0.76(0.75)            | 51.6 90.3 101.0 127.8 150.7 165.7 210.9 287.6 299.8<br>308.1 353.9 412.9 430.2 461.6 466.4 497.2 510.9 519.6<br>530.6 559.1 565.9 576.5 611.9 627.1 656.7 667.9 694.9<br>739.7 748.5 771.1 792.0 811.9 835.2 843.4 853.7 864.8<br>888.4 901.9 952.3 969.4 971.8 980.2 1054.7 1061.9<br>1135.3 1145.1 1169.3 1191.6 1200.3 1237.6 1247.2<br>1251.4 1282.7 1322.4 1368.6 1397.2 1413.0 1422.2<br>1438.9 1479.0 1490.6 1514.6 1530.9 1599.9 1622.5<br>1643.8 1651.5 1670.8 2172.3 3024.3 3156.4 3157.1<br>3161.7 3172.7 3174.0 3177.6 3184.6 3266.4   | 0.57950<br>0.41894<br>0.24316 |
| a7           | -766.42516              | 55.8                       | 0.20729                   | 0.75(0.75)            | 58.8 92.3 115.9 132.5 188.3 214.9 283.6 289.8 307.4<br>322.3 396.1 435.7 463.9 480.6 485.8 506.9 550.1 559.2<br>576.3 603.3 606.7 640.3 678.3 695.8 707.6 723.1 755.5<br>771.8 792.4 807.2 827.8 838.0 853.6 878.2 902.0 919.8<br>949.0 962.0 962.3 973.4 982.1 1043.5 1054.3 1069.8<br>1095.5 1136.2 1154.4 1176.4 1194.1 1219.3 1223.4<br>1243.3 1250.4 1309.7 1346.1 1367.7 1384.7 1428.6<br>1435.9 1465.7 1470.8 1504.8 1513.9 1543.6 1618.8<br>1633.0 1650.5 1665.8 1894.2 3157.1 3159.8 3162.4<br>3174.6 3176.9 3177.5 3189.5 3191.1 3216.9  | 0.54230<br>0.50770<br>0.28903 |
| a10          | -766.46210              | 32.6                       | 0.20659                   | 0.78(0.75)            | 41.4 49.0 91.1 136.1 188.9 195.7 211.5 265.5 275.0<br>298.8 350.9 411.5 445.8 459.1 500.7 517.7 531.3 547.9<br>567.1 570.5 582.1 582.3 630.1 653.6 684.0 693.2 719.5                                                                                                                                                                                                                                                                                                                                                                               | 0.68984<br>0.26855<br>0.19330 |

|                               |                |      |         |            |                                                                                                                                                                                                                                                                                                                                                                                                                                                                                                                                                    |                               |
|-------------------------------|----------------|------|---------|------------|----------------------------------------------------------------------------------------------------------------------------------------------------------------------------------------------------------------------------------------------------------------------------------------------------------------------------------------------------------------------------------------------------------------------------------------------------------------------------------------------------------------------------------------------------|-------------------------------|
|                               |                |      |         |            | 760.0 775.5 792.6 815.1 817.6 835.0 846.4 917.1 920.3<br>942.3 964.2 973.6 982.1 1004.2 1028.6 1034.1 1053.4<br>1104.2 1162.5 1175.9 1178.5 1200.9 1227.2 1233.2<br>1257.4 1295.9 1297.8 1356.3 1387.8 1396.4 1422.7<br>1440.1 1470.8 1481.5 1489.5 1514.8 1554.0 1613.0<br>1650.1 1675.9 1715.3 2207.0 3061.5 3160.9 3161.2<br>3164.2 3175.6 3177.9 3179.6 3187.1 3243.9                                                                                                                                                                          |                               |
| a11                           | -766.44735     | 41.8 | 0.20801 | 0.78(0.75) | 57.1 85.9 123.3 145.4 209.2 280.0 283.5 287.1 339.3<br>388.0 434.9 458.4 465.6 477.1 494.0 504.0 543.4 550.3<br>590.9 595.9 616.3 653.4 673.7 679.7 695.2 707.3 751.8<br>765.9 787.7 796.1 805.2 826.2 845.7 853.6 915.6 947.8<br>957.7 967.2 978.9 990.8 1036.4 1049.0 1095.7 1127.1<br>1155.2 1160.6 1170.9 1182.1 1207.5 1220.6 1236.1<br>1243.0 1248.8 1290.2 1330.7 1364.5 1375.9 1390.6<br>1430.9 1443.2 1457.3 1465.4 1502.1 1509.5 1595.1<br>1620.6 1637.7 1645.4 2181.7 3010.3 3155.4 3157.8<br>3159.2 3169.3 3173.6 3177.6 3182.6 3215.9 | 0.58226<br>0.41992<br>0.25424 |
| CO                            | -113.34134     | N/A  | 0.00506 |            | 2219.8                                                                                                                                                                                                                                                                                                                                                                                                                                                                                                                                             | 58.03862                      |
| a4                            | -653.10710     | N/A  | 0.19845 | 0.78(0.75) | 84.2 135.1 198.8 262.2 297.4 308.6 343.6 427.6 464.6<br>467.6 484.8 493.6 546.4 557.6 587.5 599.3 617.9 641.6<br>654.5 682.4 705.3 724.8 760.4 772.9 793.8 803.5 820.3<br>836.7 855.2 881.2 905.4 913.1 952.1 964.3 971.1 978.7<br>992.5 1042.2 1071.8 1091.9 1140.9 1146.8 1170.9<br>1203.6 1216.2 1220.3 1250.0 1276.1 1310.0 1342.7<br>1351.4 1366.8 1409.1 1425.5 1436.6 1460.5 1471.9<br>1507.5 1510.7 1600.9 1633.2 1657.8 1715.8 3155.2<br>3157.4 3161.0 3172.6 3173.9 3174.4 3185.8 3194.7<br>3215.9                                       | 0.84583<br>0.55821<br>0.34196 |
| C <sub>2</sub> H <sub>2</sub> | -77.32860      | N/A  | 0.02699 |            | 643.0 643.0 773.6 773.6 2070.6 3419.9 3523.0                                                                                                                                                                                                                                                                                                                                                                                                                                                                                                       | 35.64470                      |
| a8                            | -689.04077     | N/A  | 0.17386 | 0.76(0.75) | 68.1 101.5 102.6 191.0 227.9 288.8 322.7 334.5 430.4<br>441.2 485.4 488.6 494.1 512.2 526.8 538.9 562.4 603.5<br>604.4 628.1 674.6 720.1 723.7 764.6 776.2 787.6 833.8<br>838.5 888.4 893.3 900.1 941.1 971.9 980.4 1011.2<br>1055.2 1066.3 1119.6 1143.1 1167.8 1197.9 1228.9<br>1245.4 1255.7 1312.2 1335.5 1384.9 1409.0 1416.2<br>1434.7 1460.4 1488.3 1499.0 1521.7 1583.6 1618.8<br>1639.1 1665.6 2213.8 3158.6 3160.7 3162.7 3174.2<br>3175.9 3177.3 3185.7                                                                                 | 0.62187<br>0.60189<br>0.30586 |
| H                             | -0.50216       | N/A  |         | 0.75(0.75) |                                                                                                                                                                                                                                                                                                                                                                                                                                                                                                                                                    |                               |
| a9                            | -<br>765.87671 | N/A  | 0.19553 | 0.75(0.75) | 52.9 86.3 100.6 114.4 124.3 200.2 241.1 294.0 310.9<br>333.1 390.8 415.6 421.9 470.6 471.8 495.8 524.5 529.1<br>547.3 560.0 595.4 599.3 614.8 625.7 647.9 670.1 698.0<br>701.2 747.7 748.4 771.8 812.6 839.7 843.2 850.0 890.4<br>902.0 946.1 961.1 973.4 981.9 1051.8 1063.0 1123.0<br>1144.7 1167.9 1193.7 1216.3 1239.1 1249.0 1264.0<br>1318.4 1368.9 1391.8 1418.1 1420.0 1437.9 1478.1<br>1489.1 1511.3 1528.4 1606.5 1624.5 1647.7 1669.9<br>2195.7 2212.2 3158.5 3162.4 3170.3 3173.4 3176.0<br>3185.3 3190.3 3475.5                       | 0.60082<br>0.39439<br>0.23810 |
| a12                           | -653.04884     | N/A  | 0.19891 | 0.76(0.75) | 107.5 137.0 204.3 269.1 286.3 301.4 356.3 430.2 458.7<br>467.8 479.4 503.6 544.3 550.9 588.1 596.1 607.3 643.2<br>680.1 699.4 717.8 764.9 789.4 791.0 795.2 808.9 838.1<br>847.3 859.8 892.1 919.7 945.8 959.4 972.3 981.6 996.7<br>1042.4 1050.9 1095.6 1136.5 1153.8 1170.2 1175.3<br>1186.0 1210.1 1222.3 1232.4 1239.1 1261.2 1323.2<br>1364.7 1381.5 1420.1 1435.7 1461.2 1469.5 1496.8<br>1513.8 1530.7 1616.8 1626.5 1650.7 1655.0 3017.2<br>3156.3 3158.6 3160.0 3172.6 3174.0 3176.3 3184.7<br>3200.6                                     | 0.85073<br>0.56422<br>0.35276 |
| aTS1-3                        | -766.38630     | 80.1 | 0.20541 | 0.77(0.75) | -268.7 57.3 85.4 134.3 175.5 210.3 279.6 281.2 286.1<br>332.2 416.2 430.3 462.9 465.6 479.3 499.9 533.8 559.4<br>576.6 596.7 607.8 610.6 621.7 644.6 686.4 691.3 744.5<br>759.7 787.6 794.5 819.0 833.2 861.7 873.1 892.1 897.4<br>937.9 944.3 955.7 961.7 969.5 1043.6 1066.0 1072.1<br>1103.6 1147.8 1158.8 1171.4 1182.2 1209.3 1214.0<br>1231.6 1256.1 1263.2 1353.6 1359.7 1377.3 1411.8<br>1419.4 1436.5 1452.6 1461.8 1504.6 1508.4 1597.0<br>1613.5 1651.3 1675.3 2091.1 2988.1 3152.9 3156.1<br>3157.5 3167.7 3170.5 3177.4 3180.2 3223.8 | 0.61021<br>0.42050<br>0.26629 |
| aTS1-5                        | -766.39998     | 71.6 | 0.20524 | 0.78(0.75) | -321.0 45.1 68.5 98.5 141.0 196.7 229.1 238.4 292.1<br>298.6 389.3 398.0 423.7 442.9 459.2 497.0 511.7 533.1<br>546.1 569.2 588.4 602.0 622.4 649.3 666.4 678.5 716.0<br>725.8 762.9 778.6 787.9 828.8 834.3 838.9 893.2 907.8<br>918.8 960.1 969.0 978.3 980.6 1000.5 1044.9 1053.3<br>1142.9 1159.1 1169.9 1185.6 1210.6 1221.4 1229.8                                                                                                                                                                                                           | 0.61042<br>0.37055<br>0.23075 |

|        |            |      |         |            |                                                                                                                                                                                                                                                                                                                                                                                                                                                                                                                                                     |                               |
|--------|------------|------|---------|------------|-----------------------------------------------------------------------------------------------------------------------------------------------------------------------------------------------------------------------------------------------------------------------------------------------------------------------------------------------------------------------------------------------------------------------------------------------------------------------------------------------------------------------------------------------------|-------------------------------|
|        |            |      |         |            | 1242.1 1282.0 1344.8 1371.7 1384.7 1428.0 1435.1<br>1455.6 1460.4 1468.4 1513.7 1517.3 1558.0 1587.8<br>1623.0 1642.9 1689.5 2115.5 3127.5 3156.8 3157.3<br>3161.8 3169.5 3174.0 3175.7 3177.7 3186.4                                                                                                                                                                                                                                                                                                                                               |                               |
| aTS1-6 | -766.43400 | 50.2 | 0.20472 | 0.76(0.75) | -206.8 48.0 86.4 115.1 179.9 196.0 224.2 277.1 307.9<br>341.6 361.6 402.2 414.2 452.3 460.1 492.2 504.1 515.7<br>528.6 564.5 574.1 576.8 602.8 616.4 649.2 657.0 694.2<br>747.1 747.8 770.7 778.2 829.0 834.9 847.3 848.1 868.5<br>890.8 905.8 949.3 972.1 972.8 980.3 1052.0 1065.2<br>1136.0 1143.9 1167.2 1182.9 1201.4 1231.3 1246.0<br>1251.4 1280.5 1315.3 1368.7 1396.8 1413.4 1423.2<br>1438.8 1477.5 1488.6 1513.6 1527.8 1594.4 1621.0<br>1641.0 1654.7 1674.7 2055.7 3050.4 3156.1 3158.1<br>3160.8 3173.3 3174.1 3177.8 3184.4 3277.5   | 0.58318<br>0.42943<br>0.24732 |
| aTS1-7 | -766.39901 | 72.2 | 0.20601 | 0.78(0.75) | -603.3 76.6 100.8 127.5 206.1 210.7 277.8 284.9 288.3<br>354.8 404.5 438.5 454.6 467.9 474.7 490.5 532.0 548.6<br>563.4 593.3 598.0 632.1 654.5 697.9 705.6 720.1 744.7<br>768.4 790.1 806.7 815.7 833.3 843.9 849.7 888.7 909.8<br>925.7 956.9 961.6 971.3 981.1 1041.8 1058.0 1062.8<br>1107.5 1120.5 1159.4 1177.8 1195.0 1216.2 1224.1<br>1235.4 1248.0 1301.4 1324.4 1349.1 1373.7 1391.1<br>1433.9 1444.4 1464.8 1467.5 1509.4 1513.5 1612.8<br>1625.2 1648.2 1654.3 1904.7 3157.4 3160.4 3162.1<br>3174.6 3175.5 3179.2 3187.0 3199.5 3216.1 | 0.56545<br>0.47806<br>0.28290 |
| aTS5-3 | -766.36406 | 94.1 | 0.20458 | 0.79(0.75) | -591.3 31.8 59.5 105.0 130.5 197.7 250.5 276.7 281.0<br>290.2 358.5 383.6 417.6 450.0 452.6 508.1 518.8 534.0<br>565.4 580.8 597.5 609.9 617.1 642.2 667.2 680.2 721.9<br>734.9 753.1 770.2 804.5 817.4 829.8 840.0 844.6 924.3<br>955.9 957.7 968.4 978.9 982.4 985.5 1032.8 1056.7<br>1076.6 1130.7 1156.3 1169.4 1197.7 1206.9 1217.6<br>1238.8 1259.2 1287.1 1363.2 1381.0 1404.4 1415.0<br>1444.3 1455.6 1488.0 1503.6 1530.5 1576.0 1596.2<br>1625.9 1657.0 1716.8 2087.9 3067.5 3156.9 3157.9<br>3159.8 3171.8 3174.0 3177.4 3183.0 3201.6   | 0.61152<br>0.35267<br>0.22874 |
| aTS3-4 | -766.39979 | 71.7 | 0.20469 | 0.83(0.75) | -509.6 40.6 63.3 102.1 125.5 159.5 209.3 286.1 293.7<br>316.3 339.0 392.6 442.3 458.3 465.0 486.8 507.1 551.1<br>569.2 591.6 600.0 613.5 637.2 648.1 686.6 698.0 748.0<br>749.8 776.3 802.0 811.3 817.8 840.9 868.7 898.4 912.0<br>927.6 958.9 963.6 974.0 979.0 984.3 1037.8 1073.3<br>1119.5 1137.7 1157.7 1179.7 1183.8 1210.4 1219.8<br>1240.9 1271.0 1296.0 1357.0 1375.7 1384.1 1412.3<br>1438.5 1443.1 1447.9 1479.6 1502.7 1542.8 1599.3<br>1620.1 1650.6 1699.9 1957.0 3109.1 3156.7 3159.3<br>3160.8 3173.7 3176.1 3178.8 3186.6 3212.7   | 0.55023<br>0.47220<br>0.27577 |
| aTS6-7 | -766.37919 | 84.6 | 0.20424 | 0.78(0.75) | -656.0 72.1 88.2 103.8 130.6 199.8 245.4 276.3 295.7<br>304.6 359.6 403.0 426.9 434.9 463.4 478.6 502.4 517.0<br>541.3 563.5 577.5 605.3 612.6 633.5 664.5 680.9 694.0<br>743.4 760.7 770.4 805.2 825.9 840.4 849.9 862.0 893.2<br>912.7 915.4 959.6 973.9 976.7 981.2 1029.2 1051.0<br>1115.4 1128.9 1155.9 1173.6 1185.4 1226.0 1228.1<br>1236.4 1250.7 1270.1 1331.0 1367.0 1381.9 1431.7<br>1437.0 1474.7 1480.2 1511.4 1520.7 1560.4 1616.7<br>1638.4 1656.9 1662.5 2075.9 3108.5 3157.7 3160.7<br>3163.0 3174.9 3176.5 3177.1 3188.2 3200.1   | 0.55179<br>0.46366<br>0.27580 |
| aTS6-8 | -766.36415 | 94.0 | 0.20098 | 0.77(0.75) | -291.3 27.4 29.8 68.8 73.3 104.7 109.2 175.3 209.0<br>245.4 292.0 324.7 337.2 430.4 444.5 461.0 494.5 494.9<br>505.2 529.5 537.3 558.2 567.2 606.5 607.3 631.3 653.6<br>673.8 709.7 728.4 752.3 768.1 769.1 782.6 797.6 837.1<br>839.2 884.5 893.2 898.7 942.3 970.8 979.1 1006.3<br>1054.7 1064.4 1120.5 1142.9 1167.6 1198.3 1230.5<br>1244.9 1256.1 1312.4 1341.9 1384.6 1407.3 1415.8<br>1435.2 1460.6 1488.9 1500.6 1519.6 1585.0 1617.6<br>1638.8 1666.0 1951.2 2208.2 3153.1 3156.3 3161.2<br>3171.4 3172.6 3174.3 3184.4 3397.9 3485.8      | 0.59019<br>0.36480<br>0.22814 |
| aTS6-9 | -766.37177 | 89.3 | 0.19673 | 0.76(0.75) | -690.8 45.3 58.4 89.5 116.2 118.2 152.3 202.1 250.1<br>294.4 315.9 335.0 411.9 418.3 427.2 473.9 476.5 494.6<br>521.9 524.1 529.2 548.6 561.5 584.9 600.4 614.9 624.8<br>645.8 671.0 681.2 702.7 745.9 748.7 771.8 812.1 839.7<br>844.3 850.5 889.6 902.5 945.5 961.5 973.8 982.6 1051.6<br>1062.6 1121.4 1145.0 1167.8 1191.1 1216.8 1238.5<br>1248.9 1264.1 1318.8 1368.3 1390.2 1418.4 1418.9<br>1438.2 1476.5 1489.9 1511.9 1527.3 1602.6 1624.0<br>1647.8 1670.2 2099.6 2206.4 3159.0 3163.0 3171.2<br>3173.8 3176.4 3185.8 3188.7 3460.8      | 0.59308<br>0.39710<br>0.23806 |
| aTS7-4 | -766.42298 | 57.1 | 0.20553 | 0.76(0.75) | -418.3 67.4 83.6 108.0 129.6 184.7 211.8 270.5 287.6<br>303.2 317.5 380.1 436.3 468.0 477.7 485.9 502.7 553.7                                                                                                                                                                                                                                                                                                                                                                                                                                       | 0.53290<br>0.49839            |

|              |                         |                            |                           |                   | 561.1 598.5 604.7 623.9 647.9 663.0 698.3 711.0 739.1<br>769.1 771.2 792.7 815.1 828.1 839.0 881.2 902.0 915.2<br>933.7 958.4 962.1 972.8 980.8 1045.7 1066.3 1090.3<br>1104.4 1133.5 1153.0 1177.3 1204.7 1215.3 1222.8<br>1247.6 1256.9 1316.2 1346.1 1366.1 1382.2 1423.0<br>1434.7 1460.8 1470.3 1481.7 1511.0 1519.1 1614.1<br>1632.1 1651.4 1675.6 1978.6 3156.2 3158.6 3162.2<br>3173.6 3175.6 3175.9 3187.6 3192.8 3216.9                                                                                                                   | 0.28593                       |
|--------------|-------------------------|----------------------------|---------------------------|-------------------|-----------------------------------------------------------------------------------------------------------------------------------------------------------------------------------------------------------------------------------------------------------------------------------------------------------------------------------------------------------------------------------------------------------------------------------------------------------------------------------------------------------------------------------------------------|-------------------------------|
| aTS5-10      | -766.39706              | 73.4                       | 0.20156                   | 0.77(0.75)        | -887.1 46.8 89.1 90.5 140.1 191.9 241.6 256.0 285.6<br>291.3 301.1 391.1 418.5 443.6 461.3 506.3 521.0 536.4<br>560.1 569.7 578.1 596.3 639.3 647.2 660.2 682.3 722.8<br>744.9 770.2 789.8 796.3 829.9 835.0 849.8 903.7 928.3<br>957.4 965.2 973.4 979.8 986.0 1019.8 1038.9 1047.1<br>1083.5 1151.6 1159.5 1180.7 1199.6 1219.9 1223.2<br>1243.8 1259.0 1295.1 1352.2 1379.9 1398.0 1423.8<br>1436.4 1456.8 1472.8 1483.8 1513.0 1548.8 1575.9<br>1616.8 1646.4 1672.7 1682.4 2181.8 3149.4 3157.1<br>3157.4 3160.7 3173.2 3174.3 3176.2 3184.3   | 0.68351<br>0.28299<br>0.20016 |
| aTS10-11     | -766.42207              | 57.7                       | 0.20651                   | 0.76(0.75)        | -401.0 53.8 88.1 108.3 144.6 204.7 267.9 279.2 311.4<br>322.6 399.1 426.4 456.9 470.9 484.5 506.3 535.2 545.8<br>574.8 579.8 592.7 607.2 621.9 646.7 675.0 692.1 750.2<br>769.8 777.3 783.9 806.4 824.3 839.5 855.7 895.2 923.2<br>961.4 965.3 971.7 982.4 1005.8 1010.0 1046.6 1058.2<br>1118.1 1160.8 1171.0 1182.7 1194.1 1218.6 1228.6<br>1249.0 1267.9 1329.2 1354.6 1375.7 1409.2 1430.0<br>1439.9 1465.7 1472.0 1499.1 1509.6 1527.2 1593.9<br>1622.7 1645.2 1671.2 2161.7 3157.7 3160.7 3161.7<br>3162.3 3172.9 3174.9 3175.0 3177.9 3184.9 | 0.58148<br>0.38063<br>0.23861 |
| aTS11-12     | -766.38946              | 78.2                       | 0.20458                   | 0.76(0.75)        | -104.7 17.2 21.2 67.8 106.2 142.0 185.5 206.0 271.8<br>286.7 304.5 357.6 429.4 458.6 468.5 479.9 504.5 544.7<br>551.0 587.9 596.0 607.5 642.5 680.6 699.6 716.3 766.4<br>789.6 791.1 795.5 807.7 836.1 847.1 867.1 892.4 923.1<br>944.9 959.6 972.9 983.3 996.4 1041.9 1050.8 1095.9<br>1137.3 1154.4 1170.3 1176.8 1186.2 1211.5 1222.3<br>1233.8 1239.7 1262.5 1324.1 1364.9 1382.0 1420.8<br>1435.8 1461.5 1469.2 1497.4 1513.8 1532.6 1616.5<br>1626.2 1650.6 1654.3 2150.3 3017.0 3156.4 3158.9<br>3160.8 3173.4 3174.3 3177.3 3185.4 3204.3   | 0.56928<br>0.37784<br>0.23489 |
| Oxyradical b |                         |                            |                           |                   |                                                                                                                                                                                                                                                                                                                                                                                                                                                                                                                                                     |                               |
| Species      | Total Energy (hartrees) | Relative Energy (kcal/mol) | ZPE (unscaled) (hartrees) | <S <sup>2</sup> > | Frequencies (unscaled) (cm <sup>-1</sup> )                                                                                                                                                                                                                                                                                                                                                                                                                                                                                                          | Rotational constants (GHz)    |
| b            | -766.51286              | 0.0                        | 0.20957                   | 0.79(0.75)        | 65.8 100.2 179.9 185.1 231.1 239.5 295.1 322.9 383.0<br>407.3 429.7 430.9 457.2 483.4 525.9 539.2 548.4 591.1<br>598.7 621.0 623.5 650.5 666.8 692.3 718.7 762.8 778.8<br>783.7 800.7 827.9 835.8 844.8 868.9 900.8 912.8 928.8<br>950.9 970.3 975.2 978.2 986.9 1043.2 1064.8 1137.4<br>1154.9 1159.2 1188.6 1200.9 1220.0 1238.5 1246.3<br>1252.7 1290.0 1353.8 1367.7 1398.4 1414.5 1436.6<br>1448.4 1469.5 1480.3 1496.0 1514.3 1525.0 1597.3<br>1629.3 1634.4 1658.1 1685.0 3160.5 3164.0 3164.1<br>3176.3 3177.4 3180.9 3187.3 3188.2 3191.3  | 0.67724<br>0.37253<br>0.24033 |
| b2           | -766.41749              | 59.9                       | 0.20764                   | 0.77(0.75)        | 56.1 92.4 135.6 150.9 215.5 282.9 291.2 319.4 381.4<br>426.0 456.6 461.4 472.6 497.7 530.9 536.2 554.6 593.9<br>595.2 603.1 618.0 643.1 682.0 692.5 696.2 754.0 769.2<br>781.0 799.7 821.2 838.5 847.1 876.7 890.5 899.7 925.8<br>944.8 948.2 969.6 977.0 998.3 1015.7 1044.3 1058.3<br>1116.6 1123.2 1140.7 1161.4 1188.1 1205.1 1209.0<br>1219.7 1244.1 1286.4 1295.6 1343.2 1369.5 1372.9<br>1414.6 1434.9 1458.1 1468.0 1493.1 1506.7 1580.3<br>1624.9 1661.8 1691.5 1916.6 3132.9 3145.3 3156.4<br>3161.0 3163.0 3173.8 3174.5 3180.2 3184.8   | 0.64266<br>0.41257<br>0.27898 |
| b3           | -766.40214              | 69.5                       | 0.20694                   | 0.76(0.75)        | 41.1 59.6 111.9 145.7 173.1 211.9 278.6 291.9 315.9<br>340.8 395.8 453.9 457.8 465.9 490.4 525.5 551.8 589.9<br>590.8 600.0 618.0 641.7 664.1 674.1 686.1 737.5 746.3<br>760.9 790.4 808.2 817.6 829.7 842.8 872.5 913.1 919.2<br>950.1 963.2 963.8 979.8 983.7 1038.5 1066.8 1094.7<br>1104.4 1119.0 1159.2 1160.8 1192.6 1204.8 1215.9<br>1236.1 1261.3 1280.2 1366.2 1384.4 1399.2 1424.6<br>1442.7 1452.4 1494.7 1504.0 1512.5 1582.5 1595.5<br>1622.3 1650.5 1706.8 1903.8 2994.8 3157.3 3158.4<br>3162.1 3174.4 3177.2 3180.1 3188.5 3213.2   | 0.55981<br>0.46423<br>0.26918 |
| b5           | -766.40537              | 67.5                       | 0.20443                   | 0.85(0.75)        | 45.4 85.3 88.2 103.9 136.9 211.5 211.9 277.1 287.6<br>304.9 374.5 388.6 437.9 445.2 445.4 485.2 505.0 521.9<br>532.3 546.0 573.2 603.0 609.6 615.4 640.5 668.4 680.0<br>716.3 754.5 757.9 769.9 796.7 830.0 837.9 841.1 853.3                                                                                                                                                                                                                                                                                                                       | 0.51346<br>0.42396<br>0.23222 |

|     |            |      |         |            |                                                                                                                                                                                                                                                                                                                                                                                                                                                                                                                                                    |                               |
|-----|------------|------|---------|------------|----------------------------------------------------------------------------------------------------------------------------------------------------------------------------------------------------------------------------------------------------------------------------------------------------------------------------------------------------------------------------------------------------------------------------------------------------------------------------------------------------------------------------------------------------|-------------------------------|
|     |            |      |         |            | 892.1 923.8 957.8 965.0 974.9 980.7 1045.8 1061.5<br>1099.0 1119.7 1149.2 1165.6 1212.6 1215.3 1232.7<br>1243.1 1291.7 1328.1 1359.1 1397.6 1410.8 1417.3<br>1451.8 1468.5 1481.9 1508.5 1514.9 1557.5 1574.2<br>1632.3 1656.0 1693.3 2195.1 3141.5 3157.9 3159.1<br>3161.1 3171.7 3176.2 3182.1 3184.3 3240.6                                                                                                                                                                                                                                     |                               |
| b6  | -766.43192 | 50.8 | 0.20514 | 0.77(0.75) | 37.0 87.7 89.5 127.6 131.0 210.6 215.6 273.1 285.2<br>309.4 361.2 414.3 433.0 443.5 454.6 505.5 531.4 532.6<br>549.8 565.2 571.9 603.4 609.5 642.8 655.4 668.0 671.0<br>713.9 761.2 766.5 777.3 789.6 815.1 834.6 843.4 883.9<br>912.0 914.2 953.5 955.3 971.7 980.0 1038.5 1048.7<br>1105.8 1123.4 1157.3 1174.0 1195.0 1225.7 1236.5<br>1242.8 1267.6 1328.7 1357.3 1386.3 1411.9 1435.1<br>1439.4 1485.2 1489.9 1515.4 1533.3 1613.5 1625.4<br>1641.2 1657.8 1676.4 2205.0 3147.4 3152.3 3157.0<br>3160.9 3173.1 3173.4 3175.0 3184.6 3254.0    | 0.80282<br>0.28527<br>0.21048 |
| b7  | -766.42883 | 52.7 | 0.20781 | 0.75(0.75) | 39.3 70.4 101.7 147.7 177.7 213.9 266.7 290.0 304.9<br>390.4 417.4 431.7 459.5 466.4 498.0 538.4 548.0 576.3<br>587.4 616.9 629.2 653.1 659.4 687.6 702.0 733.9 764.6<br>776.5 798.0 824.6 833.6 843.7 860.8 892.1 915.3 922.6<br>948.9 954.5 971.0 974.7 983.0 1041.7 1069.0 1106.6<br>1132.7 1142.3 1153.3 1161.0 1171.6 1212.2 1223.1<br>1237.5 1254.9 1285.4 1348.3 1369.9 1375.4 1425.8<br>1436.1 1468.9 1471.7 1509.2 1530.5 1592.3 1620.4<br>1653.1 1679.7 1747.6 1916.0 2996.5 3156.6 3161.5<br>3165.1 3174.1 3174.9 3185.4 3186.6 3208.2  | 0.74016<br>0.34290<br>0.24787 |
| b8  | -766.45943 | 33.5 | 0.20630 | 0.80(0.75) | 46.5 51.1 89.0 118.1 181.1 213.0 233.0 281.7 292.2<br>309.5 358.2 422.3 432.5 444.4 456.8 475.8 519.6 537.3<br>548.7 563.3 572.0 602.3 614.9 650.3 657.2 675.3 692.1<br>757.8 763.6 784.9 806.4 832.3 838.1 847.8 857.5 871.6<br>925.1 934.3 967.6 980.7 989.3 995.9 1032.1 1053.0<br>1099.6 1156.3 1161.5 1180.1 1197.1 1228.4 1242.4<br>1255.1 1301.7 1350.6 1357.2 1410.8 1428.2 1438.3<br>1452.4 1470.7 1478.1 1509.3 1523.0 1564.6 1629.7<br>1652.6 1663.8 1714.5 2203.8 3146.8 3160.8 3161.5<br>3165.1 3176.9 3177.8 3178.9 3188.2 3251.5    | 0.51326<br>0.40187<br>0.22539 |
| b9  | -766.46500 | 30.0 | 0.20703 | 0.78(0.75) | 44.7 51.6 100.2 120.7 160.2 210.3 244.5 276.3 285.5<br>321.4 340.4 408.6 429.8 446.1 462.7 527.3 531.6 544.8<br>566.2 566.9 575.4 589.6 621.8 629.1 661.3 674.5 726.0<br>729.8 763.2 784.0 797.0 820.5 840.6 854.6 867.9 921.1<br>948.9 965.7 972.8 980.1 985.9 1011.0 1046.9 1074.6<br>1107.3 1152.2 1157.7 1172.9 1205.3 1232.1 1249.0<br>1267.8 1325.0 1358.8 1394.5 1429.9 1433.2 1436.7<br>1452.8 1468.4 1486.3 1516.1 1562.2 1595.8 1625.1<br>1646.7 1657.0 1679.7 2174.0 3143.5 3161.3 3163.6<br>3167.8 3174.1 3178.1 3186.2 3191.0 3239.4  | 0.76949<br>0.28548<br>0.20823 |
| b10 | -766.45738 | 34.8 | 0.20847 | 0.77(0.75) | 52.2 80.6 103.8 146.8 205.1 265.8 275.1 309.6 312.2<br>382.3 406.6 458.7 460.8 473.6 482.6 493.8 513.3 548.9<br>574.3 594.3 619.3 644.5 648.6 675.9 691.7 732.6 745.3<br>764.1 779.4 820.0 829.1 835.1 879.3 894.2 907.5 930.0<br>949.3 966.8 974.4 980.9 1045.9 1055.3 1112.0 1133.6<br>1156.1 1158.3 1177.7 1202.3 1217.5 1223.8 1238.4<br>1267.2 1299.4 1347.7 1353.3 1371.3 1402.8 1416.9<br>1434.6 1461.0 1468.1 1474.2 1505.7 1510.3 1585.0<br>1631.8 1664.4 1715.5 2187.0 3035.5 3070.1 3153.9<br>3158.7 3159.6 3171.6 3172.3 3175.3 3183.2 | 0.58899<br>0.40190<br>0.24211 |
| b11 | -766.45218 | 38.1 | 0.20819 | 0.77(0.75) | 45.5 95.4 103.2 136.3 200.2 246.5 280.3 285.0 337.6<br>372.6 394.5 437.4 463.0 469.6 518.2 533.2 540.0 555.7<br>582.7 603.2 608.9 627.4 645.4 667.9 700.4 715.2 739.1<br>759.7 784.5 818.9 831.8 846.2 876.4 896.0 908.8 922.3<br>939.2 966.0 973.2 977.0 1041.9 1046.7 1109.0 1124.8<br>1144.5 1151.3 1172.0 1201.7 1213.7 1227.2 1246.1<br>1275.8 1292.9 1345.8 1371.5 1376.7 1403.5 1419.1<br>1434.4 1455.0 1462.1 1472.0 1492.5 1505.5 1578.4<br>1622.8 1660.4 1692.3 2196.8 3018.1 3044.6 3155.1<br>3159.1 3161.0 3171.2 3172.8 3178.0 3182.7 | 0.77137<br>0.31857<br>0.22954 |
| CO  | -113.34134 | N/A  | 0.00506 |            | 2219.8                                                                                                                                                                                                                                                                                                                                                                                                                                                                                                                                             | 58.03862                      |
| b4  | -653.10710 | N/A  | 0.19845 | 0.78(0.75) | 84.2 135.1 198.8 262.2 297.4 308.6 343.6 427.6 464.6<br>467.6 484.8 493.6 546.4 557.6 587.5 599.3 617.9 641.6<br>654.5 682.4 705.3 724.8 760.4 772.9 793.8 803.5 820.3<br>836.7 855.2 881.2 905.4 913.1 952.1 964.3 971.1 978.7<br>992.5 1042.2 1071.8 1091.9 1140.9 1146.8 1170.9<br>1203.6 1216.2 1220.3 1250.0 1276.1 1310.0 1342.7<br>1351.4 1366.8 1409.1 1425.5 1436.6 1460.5 1471.9<br>1507.5 1510.7 1600.9 1633.2 1657.8 1715.8 3155.2<br>3157.4 3161.0 3172.6 3173.9 3174.4 3185.8 3194.7                                                 | 0.84583<br>0.55821<br>0.34196 |

|        |            |      |         |            |                                                                                                                                                                                                                                                                                                                                                                                                                                                                                                                                                     |                               |
|--------|------------|------|---------|------------|-----------------------------------------------------------------------------------------------------------------------------------------------------------------------------------------------------------------------------------------------------------------------------------------------------------------------------------------------------------------------------------------------------------------------------------------------------------------------------------------------------------------------------------------------------|-------------------------------|
|        |            |      |         |            | 3215.9                                                                                                                                                                                                                                                                                                                                                                                                                                                                                                                                              |                               |
| b12    | -653.05300 | N/A  | 0.19886 | 0.77(0.75) | 53.3 134.3 195.6 249.4 278.3 299.2 317.9 415.8 430.0<br>459.8 461.6 497.2 512.9 555.8 573.3 588.1 618.8 636.2<br>645.0 681.3 693.2 745.2 774.6 785.5 786.0 828.3 840.5<br>864.9 890.8 895.2 913.9 920.8 951.2 970.2 973.0 981.5<br>1041.3 1060.9 1108.3 1131.4 1136.5 1171.4 1172.1<br>1201.7 1215.0 1223.9 1248.7 1262.6 1325.4 1363.3<br>1371.1 1423.3 1434.7 1436.7 1469.4 1471.9 1510.5<br>1522.1 1583.5 1621.2 1650.6 1678.4 1741.3 3039.6<br>3071.5 3154.7 3157.8 3160.8 3172.2 3174.5 3175.3<br>3188.0                                       | 0.86125<br>0.54063<br>0.33475 |
| b13    | -653.02503 | N/A  | 0.19789 | 0.81(0.75) | 74.5 129.2 191.7 240.1 255.7 290.7 314.6 366.5 436.9<br>454.6 465.0 491.5 515.3 561.5 590.0 598.0 600.7 608.6<br>638.9 677.9 693.2 726.6 761.9 784.5 797.6 817.6 837.2<br>850.4 872.4 879.4 914.1 919.7 961.4 962.7 976.6 979.0<br>1037.1 1062.8 1099.4 1105.8 1129.0 1159.6 1177.8<br>1196.5 1211.7 1233.3 1252.3 1263.1 1347.9 1379.7<br>1386.8 1409.3 1421.4 1440.3 1450.7 1468.6 1495.1<br>1500.5 1560.7 1588.3 1617.8 1645.4 1704.4 3033.7<br>3062.7 3157.5 3158.7 3160.5 3170.3 3174.7 3182.3<br>3183.0                                       | 0.84361<br>0.55398<br>0.33993 |
| bTS1-2 | -766.41533 | 61.2 | 0.20637 | 0.77(0.75) | -331.0 63.8 106.6 150.4 169.5 212.9 267.2 284.1 310.3<br>392.8 427.1 451.8 455.8 467.2 490.9 529.1 542.9 557.1<br>593.1 605.6 627.4 637.1 662.4 672.9 695.4 747.6 764.1<br>774.5 798.4 813.0 822.1 836.8 870.3 901.2 904.6 927.2<br>947.1 953.2 969.5 976.9 987.2 1024.5 1045.0 1055.4<br>1121.4 1129.0 1143.4 1161.4 1195.3 1209.5 1211.4<br>1235.3 1246.7 1295.7 1318.8 1349.2 1368.7 1375.2<br>1417.3 1435.3 1462.0 1472.2 1499.7 1507.7 1586.4<br>1629.6 1660.3 1695.7 1878.4 3145.1 3148.0 3157.1<br>3162.2 3162.6 3174.1 3174.9 3180.0 3185.8 | 0.68775<br>0.37341<br>0.24962 |
| bTS1-5 | -766.40364 | 68.5 | 0.20352 | 0.81(0.75) | -378.5 57.7 84.1 117.3 138.9 171.1 217.6 270.5 289.9<br>300.8 350.9 397.9 404.9 446.0 450.7 455.7 494.1 518.2<br>530.6 537.7 578.4 583.5 606.0 615.3 640.9 656.8 671.9<br>703.3 756.2 763.0 770.8 781.1 800.1 829.3 837.9 839.8<br>916.4 920.5 952.1 958.2 976.9 979.6 1036.9 1062.0<br>1068.0 1115.1 1152.6 1169.3 1198.3 1216.2 1236.0<br>1248.5 1265.0 1331.4 1371.6 1402.1 1415.1 1442.7<br>1465.8 1467.3 1480.0 1510.4 1512.7 1563.9 1567.7<br>1633.1 1658.0 1694.9 2107.1 3133.1 3157.4 3158.9<br>3159.5 3168.7 3176.4 3183.4 3183.7 3248.6   | 0.62309<br>0.37215<br>0.23324 |
| bTS1-6 | -766.42663 | 54.1 | 0.20443 | 0.77(0.75) | -436.0 57.5 82.9 134.9 154.3 187.8 221.4 281.7 303.0<br>315.0 363.5 414.3 415.3 446.7 461.4 494.2 519.4 537.7<br>543.7 559.5 580.0 589.9 601.0 624.6 643.7 650.9 657.5<br>697.8 758.5 765.2 775.3 781.5 813.6 832.9 844.4 888.7<br>908.1 919.1 958.6 963.6 971.2 981.5 1044.6 1052.0<br>1077.4 1135.3 1156.4 1170.2 1190.8 1207.6 1231.8<br>1241.9 1252.9 1324.2 1365.7 1399.1 1419.8 1435.4<br>1449.0 1483.8 1488.4 1514.1 1527.9 1614.0 1625.6<br>1644.9 1666.6 1681.2 2026.7 3138.8 3156.9 3158.5<br>3161.9 3174.1 3175.0 3175.9 3186.4 3275.7   | 0.68091<br>0.35070<br>0.23169 |
| bTS2-3 | -766.38695 | 79.0 | 0.20597 | 0.79(0.75) | -548.5 51.7 92.3 110.7 163.7 212.7 273.1 290.6 316.7<br>336.9 373.5 426.6 447.1 461.3 466.9 492.0 532.3 560.5<br>598.8 603.2 613.6 630.1 646.4 688.1 695.5 744.9 749.0<br>772.6 789.8 805.3 821.3 821.9 842.9 882.7 890.3 912.9<br>951.8 959.1 964.2 971.3 979.0 1041.3 1072.5 1103.3<br>1124.0 1145.3 1160.1 1173.0 1184.9 1208.9 1214.9<br>1237.0 1272.1 1276.2 1342.9 1375.6 1382.1 1422.6<br>1437.0 1444.5 1453.6 1467.9 1504.4 1538.1 1594.9<br>1619.7 1655.5 1695.2 1914.7 2993.9 3157.1 3161.0<br>3161.2 3173.4 3174.4 3181.1 3184.3 3217.0  | 0.59962<br>0.42880<br>0.27488 |
| bTS2-7 | -766.39852 | 71.8 | 0.20608 | 0.78(0.75) | -665.5 44.9 85.6 101.4 154.8 218.8 283.2 291.8 311.2<br>351.6 423.2 459.1 461.0 463.9 489.1 512.7 542.3 569.2<br>586.3 599.0 613.2 637.1 653.4 686.7 691.2 747.9 757.8<br>772.4 778.4 800.7 826.3 839.7 840.3 879.3 891.8 905.7<br>928.9 943.2 952.3 971.1 978.4 1042.5 1059.5 1072.8<br>1110.7 1129.1 1140.5 1151.9 1170.4 1209.5 1221.1<br>1222.9 1251.0 1283.2 1345.0 1358.1 1371.5 1405.0<br>1420.9 1434.3 1462.7 1472.4 1506.7 1513.1 1596.7<br>1637.7 1669.8 1721.3 1924.9 3102.2 3154.6 3160.1<br>3163.5 3172.6 3173.6 3180.8 3184.4 3217.9  | 0.66197<br>0.39639<br>0.27705 |
| bTS5-3 | -766.36622 | 92.0 | 0.20390 | 0.80(0.75) | -630.8 35.7 59.8 99.7 136.9 190.6 237.9 274.0 285.9<br>302.7 381.3 384.6 424.3 449.5 451.7 471.6 488.0 520.8<br>551.3 581.7 588.8 609.4 632.7 640.7 646.1 688.1 703.1<br>743.7 747.3 770.2 788.2 809.8 825.0 841.7 868.8 896.4<br>916.7 919.4 954.4 961.7 977.5 980.9 1028.6 1036.8                                                                                                                                                                                                                                                                 | 0.55943<br>0.41207<br>0.24881 |

|          |            |      |         |            |                                                                                                                                                                                                                                                                                                                                                                                                                                                                                                                                                    |                               |
|----------|------------|------|---------|------------|----------------------------------------------------------------------------------------------------------------------------------------------------------------------------------------------------------------------------------------------------------------------------------------------------------------------------------------------------------------------------------------------------------------------------------------------------------------------------------------------------------------------------------------------------|-------------------------------|
|          |            |      |         |            | 1062.0 1127.2 1147.8 1160.4 1196.5 1214.5 1230.5<br>1240.1 1258.4 1303.9 1363.1 1384.3 1394.3 1418.1<br>1442.3 1454.3 1494.4 1503.4 1522.9 1566.9 1592.9<br>1624.0 1656.9 1711.3 2079.7 3073.8 3157.2 3158.0<br>3159.9 3171.9 3174.5 3180.2 3183.1 3187.7                                                                                                                                                                                                                                                                                          |                               |
| bTS6-7   | -766.39591 | 73.4 | 0.20474 | 0.78(0.75) | -620.5 36.2 77.4 90.3 143.5 184.2 233.0 277.5 293.5<br>307.8 391.4 417.9 418.4 441.1 460.6 480.4 505.9 532.0<br>557.6 579.3 596.5 618.8 636.4 655.2 659.8 682.7 721.7<br>749.9 760.9 782.9 794.1 829.4 834.2 839.6 846.8 909.0<br>920.8 934.3 952.6 963.4 974.6 982.0 1031.5 1045.9<br>1067.6 1127.7 1148.0 1170.8 1183.1 1216.0 1224.9<br>1248.8 1251.4 1288.3 1333.7 1367.7 1376.7 1429.2<br>1436.2 1474.0 1480.4 1514.6 1527.6 1604.6 1618.3<br>1654.5 1683.0 1715.9 2091.8 3096.5 3155.4 3160.0<br>3162.8 3173.0 3173.7 3179.1 3184.5 3199.1   | 0.73427<br>0.31997<br>0.23115 |
| bTS5-8   | -766.39409 | 74.5 | 0.20073 | 0.80(0.75) | -807.9 55.5 76.2 90.1 135.0 182.9 229.6 257.2 291.1<br>296.6 307.6 387.7 419.2 446.9 449.9 457.2 482.0 521.7<br>538.5 553.9 579.3 591.0 629.8 642.9 649.5 680.5 702.5<br>747.1 757.6 774.9 807.3 820.6 831.6 848.5 858.1 904.5<br>927.0 952.9 970.5 973.6 984.3 987.1 1011.6 1044.5<br>1063.6 1112.6 1145.3 1164.3 1203.5 1210.0 1222.3<br>1239.5 1263.5 1313.1 1360.5 1376.5 1410.8 1430.9<br>1442.9 1467.9 1477.4 1483.8 1512.3 1564.4 1571.3<br>1629.4 1653.9 1682.8 1837.2 2176.9 3040.8 3157.5<br>3160.4 3164.3 3173.8 3175.6 3177.5 3186.9   | 0.52322<br>0.41392<br>0.23115 |
| bTS6-9   | -766.41576 | 60.9 | 0.20055 | 0.76(0.75) | -1448.4 42.5 90.8 100.7 128.8 176.9 230.3 282.2 284.0<br>325.0 358.3 425.7 428.3 460.9 463.1 498.4 504.7 527.9<br>544.4 544.9 554.0 585.5 593.5 637.5 646.7 658.6 670.1<br>711.9 757.7 773.0 777.8 803.4 826.0 831.2 841.7 843.9<br>880.6 920.7 939.9 954.0 972.1 982.3 982.9 1041.3<br>1060.1 1116.3 1156.3 1170.5 1173.0 1207.2 1228.7<br>1239.2 1256.1 1327.6 1364.0 1388.3 1424.7 1439.1<br>1448.4 1483.3 1491.7 1504.7 1522.1 1544.2 1612.6<br>1630.3 1649.1 1679.7 1684.2 2187.4 3157.9 3161.9<br>3162.5 3174.5 3175.5 3180.2 3186.7 3237.4  | 0.78297<br>0.29351<br>0.21348 |
| bTS8-10  | -766.41927 | 58.7 | 0.20599 | 0.76(0.75) | -514.0 56.6 74.5 102.6 149.9 196.3 240.7 281.6 303.0<br>310.4 374.9 427.2 454.4 457.3 460.2 477.2 509.0 526.8<br>546.7 584.8 591.0 612.1 640.3 643.5 651.6 693.4 698.4<br>750.9 756.8 773.4 792.2 824.3 839.4 843.8 882.8 907.4<br>920.9 938.6 963.2 972.0 982.2 1011.3 1046.9 1068.2<br>1089.4 1146.5 1162.3 1194.0 1214.3 1223.4 1247.1<br>1254.6 1283.0 1352.5 1365.4 1393.4 1427.5 1432.6<br>1464.2 1471.2 1477.6 1495.2 1511.7 1593.7 1603.4<br>1627.1 1657.0 1675.4 2176.9 3126.2 3157.9 3160.7<br>3162.8 3174.9 3175.6 3178.5 3186.9 3218.2 | 0.57082<br>0.39369<br>0.23632 |
| bTS9-11  | -766.41639 | 60.5 | 0.20603 | 0.76(0.75) | -536.2 48.7 83.4 108.9 149.0 189.8 239.9 281.0 292.3<br>325.0 377.6 403.1 430.9 462.3 469.1 528.4 532.9 548.9<br>551.8 586.9 600.9 607.1 624.6 633.1 647.6 678.7 721.4<br>739.2 756.3 770.6 798.6 826.7 833.9 839.3 873.3 915.2<br>936.4 948.2 962.5 970.6 980.0 1020.6 1041.3 1057.7<br>1126.4 1154.2 1160.2 1167.4 1211.0 1216.7 1243.3<br>1255.2 1329.1 1355.2 1392.0 1408.1 1423.3 1429.6<br>1452.0 1466.5 1481.2 1499.5 1503.8 1554.5 1584.5<br>1616.1 1650.7 1673.4 2172.3 3116.9 3158.5 3162.4<br>3162.5 3173.7 3175.7 3185.6 3185.8 3194.7 | 0.74415<br>0.31304<br>0.22619 |
| bTS3-4   | -766.39979 | 71.0 | 0.20469 | 0.83(0.75) | -509.6 40.6 63.3 102.1 125.5 159.5 209.3 286.1 293.7<br>316.3 339.0 392.6 442.3 458.3 465.0 486.8 507.1 551.1<br>569.2 591.6 600.0 613.5 637.2 648.1 686.6 698.0 748.0<br>749.8 776.3 802.0 811.3 817.8 840.9 868.7 898.4 912.0<br>927.6 958.9 963.6 974.0 979.0 984.3 1037.8 1073.3<br>1119.5 1137.7 1157.7 1179.7 1183.8 1210.4 1219.8<br>1240.9 1271.0 1296.0 1357.0 1375.7 1384.1 1412.3<br>1438.5 1443.1 1447.9 1479.6 1502.7 1542.8 1599.3<br>1620.1 1650.6 1699.9 1957.0 3109.1 3156.7 3159.3<br>3160.8 3173.7 3176.1 3178.8 3186.6 3212.7  | 0.55023<br>0.47220<br>0.27577 |
| bTS7-4   | -766.42265 | 56.6 | 0.20577 | 0.77(0.75) | -442.4 49.7 62.6 96.1 121.6 160.3 205.4 262.9 306.7<br>312.3 325.7 414.9 433.3 464.3 470.9 490.5 517.8 556.2<br>561.1 592.0 616.1 619.7 642.9 658.7 691.9 700.0 759.8<br>773.7 794.1 807.7 824.4 836.6 847.3 886.7 909.6 918.1<br>924.2 952.0 962.4 972.9 980.9 1016.9 1042.9 1073.0<br>1108.8 1141.9 1156.0 1170.7 1202.7 1214.9 1223.4<br>1245.9 1270.2 1302.5 1348.5 1367.4 1373.7 1424.4<br>1436.6 1465.2 1470.1 1507.2 1520.1 1524.5 1612.5<br>1644.9 1670.1 1733.0 2000.6 3155.5 3160.3 3160.9<br>3172.9 3174.1 3174.8 3176.9 3185.5 3208.2  | 0.69925<br>0.35966<br>0.25584 |
| bTS10-12 | -766.39288 | 75.3 | 0.20450 | 0.77(0.75) | -124.8 17.0 26.8 58.2 70.6 136.1 183.4 197.2 249.8                                                                                                                                                                                                                                                                                                                                                                                                                                                                                                 | 0.57877                       |



|              |                         |                            |                           |                   | 278.1 299.0 321.4 417.7 428.7 460.5 462.3 497.8 513.8<br>555.9 573.8 588.7 617.3 637.1 647.6 680.8 691.8 746.8<br>775.8 782.2 786.5 828.2 841.0 864.4 884.0 894.2 910.5<br>923.5 952.8 971.4 973.6 982.6 1041.3 1061.1 1110.0<br>1131.8 1137.4 1171.2 1173.3 1201.9 1214.5 1223.8<br>1249.4 1263.6 1326.7 1363.5 1371.2 1423.6 1434.6<br>1436.3 1469.4 1471.8 1510.2 1522.3 1585.5 1622.5<br>1651.1 1678.9 1740.8 2148.6 3039.3 3071.3 3155.0<br>3157.9 3160.9 3172.6 3174.7 3176.0 3190.0                                                          | 0.34983<br>0.22058            |
|--------------|-------------------------|----------------------------|---------------------------|-------------------|-----------------------------------------------------------------------------------------------------------------------------------------------------------------------------------------------------------------------------------------------------------------------------------------------------------------------------------------------------------------------------------------------------------------------------------------------------------------------------------------------------------------------------------------------------|-------------------------------|
| bTS11-13     | -766.36535              | 92.6                       | 0.20354                   | 0.81(0.75)        | -112.6 17.5 28.1 64.4 82.8 129.7 180.2 192.3 239.5<br>256.6 291.8 315.7 367.1 437.5 454.7 465.5 490.1 516.5<br>562.3 590.6 598.6 601.6 609.3 639.5 676.1 693.2 727.7<br>763.0 786.0 793.8 818.0 838.5 849.2 872.6 876.5 915.3<br>917.1 962.5 963.2 978.0 981.7 1037.0 1062.5 1100.4<br>1106.4 1129.3 1159.5 1177.4 1196.6 1211.9 1233.0<br>1252.6 1262.7 1349.5 1380.3 1387.1 1409.0 1422.0<br>1440.6 1450.7 1471.2 1495.6 1500.9 1563.0 1590.6<br>1618.4 1646.0 1704.8 2152.8 3033.1 3062.1 3157.4<br>3159.2 3161.5 3170.9 3174.5 3182.6 3187.5    | 0.75138<br>0.28248<br>0.21071 |
| Oxyradical c |                         |                            |                           |                   |                                                                                                                                                                                                                                                                                                                                                                                                                                                                                                                                                     |                               |
| Species      | Total Energy (hartrees) | Relative Energy (kcal/mol) | ZPE (unscaled) (hartrees) | <S <sup>2</sup> > | Frequencies (unscaled) (cm <sup>-1</sup> )                                                                                                                                                                                                                                                                                                                                                                                                                                                                                                          | Rotational constants (GHz)    |
| c            | -766.51951              | 0.0                        | 0.20981                   | 0.78(0.75)        | 58.4 118.2 125.0 206.6 234.3 266.3 290.6 333.3 338.6<br>416.4 431.9 444.9 455.4 500.7 513.5 554.2 558.7 574.7<br>586.7 620.9 635.6 646.6 659.6 689.0 724.9 749.3 763.3<br>781.5 808.9 837.9 842.8 855.7 863.8 920.5 921.1 943.3<br>973.3 974.2 983.2 987.8 1038.2 1049.4 1055.0 1138.5<br>1143.6 1154.5 1161.8 1202.4 1215.5 1240.3 1249.6<br>1276.3 1293.6 1356.4 1369.4 1390.8 1421.8 1427.7<br>1438.9 1471.5 1479.1 1482.9 1513.6 1527.0 1595.0<br>1611.4 1647.3 1679.0 1693.5 3160.1 3164.0 3165.5<br>3168.1 3175.1 3177.4 3187.3 3190.9 3192.0 | 0.73750<br>0.36498<br>0.24415 |
| c3           | -766.42866              | 57.0                       | 0.20779                   | 0.75(0.75)        | 33.3 54.8 98.9 126.7 197.2 211.3 255.0 307.8 317.0<br>325.5 414.4 443.2 465.1 479.5 497.2 521.6 559.3 576.9<br>612.6 619.3 622.5 641.3 662.4 691.7 699.4 738.9 767.7<br>777.8 801.9 825.8 831.3 840.4 861.3 888.8 910.8 922.9<br>931.4 955.1 968.7 975.1 983.4 1040.9 1070.4 1104.4<br>1136.2 1152.9 1156.4 1163.1 1171.7 1212.9 1223.3<br>1240.0 1256.7 1285.4 1349.5 1369.8 1374.7 1426.3<br>1436.3 1469.2 1472.9 1509.5 1535.5 1583.9 1617.4<br>1656.5 1685.8 1760.1 1913.3 3011.1 3155.6 3161.8<br>3162.5 3173.4 3175.1 3179.4 3186.9 3211.3    | 0.72451<br>0.33713<br>0.23539 |
| c5           | -766.43647              | 52.1                       | 0.20664                   | 0.76(0.75)        | 44.9 64.3 95.2 122.2 184.2 189.1 222.7 244.3 274.7<br>307.4 370.3 406.4 444.8 455.2 493.5 493.6 526.3 535.1<br>542.4 560.9 605.5 630.0 640.6 653.8 682.6 684.1 713.3<br>745.1 765.9 779.7 802.5 830.2 838.7 865.8 900.3 905.9<br>941.8 942.4 971.4 979.6 1014.6 1047.4 1063.2 1099.2<br>1125.4 1152.8 1164.2 1185.4 1197.6 1227.3 1244.1<br>1256.8 1306.4 1323.4 1339.9 1380.0 1412.3 1430.7<br>1439.3 1460.0 1486.7 1501.6 1521.1 1582.9 1621.8<br>1645.0 1650.6 1674.4 2208.4 3147.4 3156.7 3158.7<br>3159.4 3160.2 3169.4 3174.2 3175.8 3182.4   | 0.62068<br>0.29540<br>0.20014 |
| CO           | -113.34134              | N/A                        | 0.00506                   |                   | 2219.8                                                                                                                                                                                                                                                                                                                                                                                                                                                                                                                                              | 58.03856                      |
| c4           | -653.10710              | N/A                        | 0.19845                   | 0.78(0.75)        | 84.2 135.1 198.8 262.2 297.4 308.6 343.6 427.6 464.6<br>467.6 484.8 493.6 546.4 557.6 587.5 599.3 617.9 641.6<br>654.5 682.4 705.3 724.8 760.4 772.9 793.8 803.5 820.3<br>836.7 855.2 881.2 905.4 913.1 952.1 964.3 971.1 978.7<br>992.5 1042.2 1071.8 1091.9 1140.9 1146.8 1170.9<br>1203.6 1216.2 1220.3 1250.0 1276.1 1310.0 1342.7<br>1351.4 1366.8 1409.1 1425.5 1436.6 1460.5 1471.9<br>1507.5 1510.7 1600.9 1633.2 1657.8 1715.8 3155.2<br>3157.4 3161.0 3172.6 3173.9 3174.4 3185.8 3194.7<br>3215.9                                        | 0.84583<br>0.55821<br>0.34196 |
| cTS1-5       | -766.42699              | 58.1                       | 0.20578                   | 0.76(0.75)        | -213.8 42.8 74.0 101.0 192.1 234.8 240.6 268.2 275.0<br>321.6 377.5 414.2 440.7 460.1 477.7 485.8 513.7 540.4<br>544.9 551.1 585.2 590.0 615.5 632.4 651.7 690.5 735.6<br>738.2 755.2 774.8 798.0 827.5 838.4 881.6 906.5 918.3<br>919.5 939.7 967.1 972.2 980.2 1009.9 1053.2 1071.0<br>1125.9 1137.8 1163.5 1196.1 1203.6 1222.8 1244.7<br>1265.5 1308.8 1341.9 1362.1 1387.8 1410.8 1427.0<br>1439.3 1463.8 1480.4 1499.3 1523.6 1602.6 1619.0<br>1635.9 1649.5 1674.6 2022.0 3138.3 3157.7 3159.7<br>3166.8 3170.8 3172.1 3175.3 3183.1 3185.3  | 0.69413<br>0.35259<br>0.23382 |
| cTS5-3       | -766.39194              | 80.1                       | 0.20534                   | 0.78(0.75)        | -584.8 35.6 72.1 92.2 130.5 197.4 251.1 258.3 283.2<br>309.6 371.1 406.9 425.6 447.6 458.2 487.3 501.0 549.8                                                                                                                                                                                                                                                                                                                                                                                                                                        | 0.69561<br>0.32275            |

|              |                         |                            |                           |                   | 561.6 584.9 614.5 625.0 632.1 655.6 659.8 710.2 739.8<br>755.9 775.5 794.8 810.5 817.3 842.0 847.9 902.2 920.5<br>937.6 957.0 965.8 972.7 980.7 1008.0 1045.0 1063.3<br>1087.1 1119.0 1155.2 1161.4 1192.1 1220.8 1233.3<br>1247.5 1253.4 1283.9 1341.0 1361.8 1374.9 1418.9<br>1428.8 1462.5 1476.3 1504.6 1525.8 1616.5 1641.1<br>1656.1 1682.5 1689.1 2091.8 3086.0 3151.6 3156.0<br>3160.2 3168.3 3172.8 3173.8 3185.0 3195.1                                                                                                                   | 0.22650                       |
|--------------|-------------------------|----------------------------|---------------------------|-------------------|-----------------------------------------------------------------------------------------------------------------------------------------------------------------------------------------------------------------------------------------------------------------------------------------------------------------------------------------------------------------------------------------------------------------------------------------------------------------------------------------------------------------------------------------------------|-------------------------------|
| cTS1-3       | -766.38881              | 82.0                       | 0.20575                   | 0.78(0.75)        | -693.3 65.6 108.0 119.8 198.3 209.3 249.6 286.1 305.5<br>343.4 405.9 422.5 436.1 459.0 476.4 507.9 518.4 537.6<br>587.6 589.8 610.2 624.6 656.4 670.4 691.4 741.8 749.7<br>767.5 784.2 805.5 819.3 838.3 838.8 898.7 910.2 922.0<br>955.2 958.0 967.0 981.2 988.0 1012.2 1043.6 1052.5<br>1085.0 1134.2 1152.3 1163.6 1191.2 1211.9 1225.6<br>1243.2 1253.8 1273.4 1344.6 1377.5 1393.0 1416.1<br>1431.5 1447.5 1466.2 1491.9 1505.7 1569.6 1620.9<br>1624.6 1653.2 1675.8 1830.6 3015.2 3157.6 3161.6<br>3162.3 3174.4 3175.2 3185.4 3186.6 3201.1 | 0.78843<br>0.34813<br>0.24844 |
| cTS3-4       | -766.42265              | 60.8                       | 0.20577                   | 0.77(0.75)        | -442.4 49.7 62.6 96.1 121.6 160.3 205.4 262.9 306.7<br>312.3 325.7 414.9 433.3 464.3 470.9 490.5 517.8 556.2<br>561.1 592.0 616.1 619.7 642.9 658.7 691.9 700.0 759.8<br>773.7 794.1 807.7 824.4 836.6 847.3 886.7 909.6 918.1<br>924.2 952.0 962.4 972.9 980.9 1016.9 1042.9 1073.0<br>1108.8 1141.9 1156.0 1170.7 1202.7 1214.9 1223.4<br>1245.9 1270.2 1302.5 1348.5 1367.4 1373.7 1424.4<br>1436.6 1465.2 1470.1 1507.2 1520.1 1524.5 1612.5<br>1644.9 1670.1 1733.0 2000.6 3155.5 3160.3 3160.9<br>3172.9 3174.1 3174.8 3176.9 3185.5 3208.2   | 0.69925<br>0.35966<br>0.25584 |
| Oxyradical d |                         |                            |                           |                   |                                                                                                                                                                                                                                                                                                                                                                                                                                                                                                                                                     |                               |
| Species      | Total Energy (hartrees) | Relative Energy (kcal/mol) | ZPE (unscaled) (hartrees) | <S <sup>2</sup> > | Frequencies (unscaled) (cm <sup>-1</sup> )                                                                                                                                                                                                                                                                                                                                                                                                                                                                                                          | Rotational constants (GHz)    |
| d            | -766.51935              | 0.0                        | 0.20983                   | 0.78(0.75)        | 69.4 96.9 164.9 183.0 247.2 270.3 292.4 304.6 336.3<br>394.2 426.8 437.7 468.2 486.7 511.7 555.1 568.7 575.1<br>577.6 618.9 632.3 666.4 667.3 714.8 757.3 761.7 775.9<br>778.2 799.9 819.6 824.2 834.0 864.4 925.5 931.2 940.8<br>973.7 982.9 984.3 994.5 1022.2 1041.1 1054.0 1103.0<br>1145.9 1157.1 1171.5 1182.7 1209.2 1233.5 1252.1<br>1277.7 1306.2 1330.4 1375.4 1388.0 1410.7 1429.2<br>1448.4 1466.9 1489.2 1497.5 1522.3 1579.9 1618.2<br>1621.5 1634.0 1654.9 1663.8 3163.5 3164.7 3166.3<br>3176.3 3181.1 3181.6 3185.8 3187.3 3197.7  | 0.68253<br>0.39091<br>0.24855 |
| d3           | -766.41511              | 65.4                       | 0.20801                   | 0.75(0.75)        | 33.4 87.3 96.4 126.6 196.4 206.0 266.0 276.0 300.2<br>338.5 439.7 444.7 464.2 484.9 502.0 514.2 560.4 563.8<br>592.5 626.4 632.9 648.8 666.9 716.9 748.0 755.5 771.5<br>777.7 805.2 810.7 826.3 835.2 864.1 908.0 920.1 939.5<br>960.1 965.4 971.3 984.7 996.7 1035.6 1036.3 1127.7<br>1139.2 1147.8 1164.0 1170.5 1177.8 1184.9 1215.8<br>1240.1 1261.0 1307.2 1335.8 1369.7 1397.6 1418.4<br>1437.6 1447.0 1484.9 1494.0 1541.1 1588.9 1614.1<br>1642.6 1650.0 1716.0 1919.4 3035.9 3160.9 3161.5<br>3162.1 3172.7 3175.1 3178.4 3183.9 3185.7    | 0.67670<br>0.38158<br>0.25416 |
| d5           | -766.45083              | 43.0                       | 0.20677                   | 0.76(0.75)        | 44.6 83.5 95.6 124.9 128.6 178.5 215.4 281.0 292.0<br>326.5 352.4 432.1 454.0 462.7 482.5 500.5 515.3 532.5<br>555.3 574.2 613.7 623.6 626.8 658.6 684.6 688.6 734.8<br>762.2 767.6 784.8 794.1 818.1 837.7 890.6 905.9 920.6<br>930.0 961.2 962.5 979.9 982.5 1054.8 1061.3 1104.4<br>1123.8 1128.6 1169.7 1178.8 1202.4 1231.9 1240.6<br>1260.7 1277.0 1321.9 1370.5 1397.3 1400.8 1429.4<br>1451.3 1460.0 1463.8 1498.9 1527.1 1555.6 1623.7<br>1638.6 1643.2 1654.5 2206.5 3153.3 3156.6 3160.9<br>3161.8 3171.0 3172.7 3175.9 3183.9 3185.7    | 0.50058<br>0.37067<br>0.21297 |
| CO           | -113.34134              | N/A                        | 0.00506                   |                   | 2219.8                                                                                                                                                                                                                                                                                                                                                                                                                                                                                                                                              | 58.03862                      |
| d4           | -653.08607              | N/A                        | 0.19848                   | 0.78(0.75)        | 100.7 138.2 201.2 269.6 283.9 303.2 331.7 445.9 460.2<br>467.4 493.9 506.2 546.2 561.6 594.2 602.0 625.3 634.0<br>658.0 666.2 736.3 747.7 751.3 765.9 783.6 794.8 807.3<br>825.1 855.7 893.1 915.5 932.9 960.3 964.9 973.6 982.5<br>1003.7 1037.0 1040.7 1099.4 1140.1 1152.4 1173.9<br>1185.5 1203.3 1211.3 1239.4 1269.5 1301.0 1338.0<br>1363.6 1394.5 1411.2 1433.0 1445.4 1477.6 1484.6<br>1527.6 1574.2 1597.3 1608.7 1612.4 1659.1 3157.7<br>3158.8 3159.7 3170.2 3171.2 3175.1 3182.0 3182.9<br>3202.0                                      | 0.89218<br>0.53394<br>0.34677 |
| dTS1-5       | -766.43797              | 51.1                       | 0.20545                   | 0.77(0.75)        | -612.8 60.4 82.3 128.8 151.1 192.5 236.1 256.2 287.4<br>318.9 333.0 428.9 433.7 455.3 480.1 506.2 519.7 530.0<br>548.0 561.2 573.2 609.1 621.8 627.9 661.6 684.5 729.5                                                                                                                                                                                                                                                                                                                                                                              | 0.62520<br>0.39024<br>0.24050 |

|              |                         |                            |                           |                   | 745.6 756.7 773.7 778.9 813.8 838.9 900.2 913.6 923.9<br>941.9 962.3 963.6 964.7 978.7 1039.9 1047.8 1081.3<br>1101.5 1139.7 1165.5 1173.5 1180.5 1209.5 1244.0<br>1258.2 1297.0 1321.3 1368.9 1400.2 1412.2 1416.9<br>1444.7 1462.3 1469.1 1504.3 1525.6 1557.7 1632.1<br>1640.0 1653.6 1667.1 1960.7 3140.4 3159.6 3161.6<br>3163.6 3171.8 3176.7 3179.3 3185.2 3193.0                                                                                                                                                                            |                               |
|--------------|-------------------------|----------------------------|---------------------------|-------------------|-----------------------------------------------------------------------------------------------------------------------------------------------------------------------------------------------------------------------------------------------------------------------------------------------------------------------------------------------------------------------------------------------------------------------------------------------------------------------------------------------------------------------------------------------------|-------------------------------|
| dTS5-3       | -766.39163              | 80.1                       | 0.20572                   | 0.77(0.75)        | -558.5 44.5 63.9 93.9 136.3 188.0 234.8 277.3 284.1<br>315.6 374.3 415.4 432.2 450.1 476.5 493.8 507.7 525.8<br>558.5 580.0 619.9 632.5 644.7 653.7 679.2 714.6 753.7<br>764.8 783.8 793.6 802.1 833.1 847.1 904.9 909.8 924.0<br>955.1 962.2 968.3 982.7 985.1 1023.4 1030.7 1045.5<br>1083.0 1141.2 1158.8 1173.2 1195.1 1213.7 1231.8<br>1246.2 1262.8 1302.5 1316.2 1374.2 1394.3 1419.1<br>1438.9 1446.6 1462.6 1499.5 1536.0 1567.2 1621.0<br>1648.1 1664.1 1723.1 2051.1 3097.9 3153.2 3160.3<br>3164.2 3170.2 3172.9 3178.6 3181.7 3183.6   | 0.57923<br>0.39807<br>0.24838 |
| dTS1-3       | -766.37679              | 89.5                       | 0.20583                   | 0.77(0.75)        | -719.5 79.7 87.3 152.6 170.8 196.5 235.4 268.9 282.2<br>334.6 362.7 412.0 438.9 461.2 489.8 501.5 519.3 546.0<br>564.3 583.8 614.5 631.9 646.4 669.2 690.1 747.0 758.1<br>765.6 779.4 796.8 808.7 832.5 890.2 904.6 920.5 937.9<br>961.6 967.2 974.1 982.5 986.3 1034.6 1039.6 1060.6<br>1086.5 1142.7 1159.5 1171.9 1180.1 1214.4 1234.5<br>1242.9 1267.2 1312.6 1323.8 1373.5 1394.7 1418.1<br>1437.9 1445.1 1455.4 1496.2 1528.1 1561.7 1609.1<br>1621.8 1638.8 1701.0 1807.0 3032.2 3161.3 3163.7<br>3163.8 3172.6 3181.3 3181.4 3184.3 3195.5  | 0.72013<br>0.38082<br>0.25859 |
| dTS3-4       | -766.40737              | 70.3                       | 0.20565                   | 0.77(0.75)        | -428.7 55.3 63.1 99.9 129.5 141.2 205.5 254.2 274.1<br>294.2 330.7 408.2 445.3 460.4 476.9 495.4 516.1 560.9<br>579.9 597.6 609.5 632.7 643.0 661.0 699.6 745.5 753.7<br>769.4 782.9 801.3 810.4 828.1 844.6 900.5 917.2 936.2<br>949.8 960.1 968.5 978.5 985.0 999.1 1037.6 1040.4<br>1135.4 1143.0 1152.7 1174.1 1178.2 1203.7 1212.5<br>1239.6 1270.5 1307.1 1338.3 1368.1 1397.4 1414.5<br>1436.0 1447.8 1483.4 1489.5 1533.5 1584.2 1609.9<br>1624.1 1626.3 1684.6 2012.7 3159.7 3160.3 3160.8<br>3170.8 3172.8 3176.9 3183.1 3184.0 3189.0    | 0.62689<br>0.40510<br>0.27271 |
| Oxyradical e |                         |                            |                           |                   |                                                                                                                                                                                                                                                                                                                                                                                                                                                                                                                                                     |                               |
| Species      | Total Energy (hartrees) | Relative Energy (kcal/mol) | ZPE (unscaled) (hartrees) | <S <sup>2</sup> > | Frequencies (unscaled) (cm <sup>-1</sup> )                                                                                                                                                                                                                                                                                                                                                                                                                                                                                                          | Rotational constants (GHz)    |
| e            | -766.51808              | 0.0                        | 0.20975                   | 0.78(0.75)        | 70.1 100.6 138.1 208.6 256.0 270.3 287.7 305.7 314.7<br>406.9 436.1 436.8 461.2 482.4 519.1 521.2 576.5 584.1<br>617.2 628.6 631.8 641.8 666.7 702.6 717.8 754.6 773.4<br>781.9 798.0 820.5 841.6 857.1 877.4 917.0 917.3 927.7<br>976.6 980.4 982.4 991.9 1019.6 1042.0 1048.0 1091.8<br>1142.9 1158.3 1179.6 1197.4 1221.3 1236.4 1255.7<br>1268.3 1298.4 1340.7 1364.9 1389.2 1414.1 1431.7<br>1448.6 1454.1 1478.9 1502.2 1522.4 1565.6 1599.8<br>1618.1 1634.6 1656.1 1703.5 3163.6 3166.5 3167.6<br>3175.0 3178.9 3182.9 3186.4 3189.1 3193.3 | 0.57620<br>0.44440<br>0.25089 |
| e3           | -766.41511              | 64.6                       | 0.20801                   | 0.75(0.75)        | 33.4 87.3 96.4 126.6 196.4 206.0 266.0 276.0 300.2<br>338.5 439.7 444.7 464.2 484.9 502.0 514.2 560.4 563.8<br>592.5 626.4 632.9 648.8 666.9 716.9 748.0 755.5 771.5<br>777.7 805.2 810.7 826.3 835.2 864.1 908.0 920.1 939.5<br>960.1 965.4 971.3 984.7 996.7 1035.6 1036.3 1127.7<br>1139.2 1147.8 1164.0 1170.5 1177.8 1184.9 1215.8<br>1240.1 1261.0 1307.2 1335.8 1369.7 1397.6 1418.4<br>1437.6 1447.0 1484.9 1494.0 1541.1 1588.9 1614.1<br>1642.6 1650.0 1716.0 1919.4 3035.9 3160.9 3161.5<br>3162.1 3172.7 3175.1 3178.4 3183.9 3185.7    | 0.67670<br>0.38158<br>0.25416 |
| e5           | -766.44862              | 43.6                       | 0.20675                   | 0.76(0.75)        | 34.6 82.8 90.0 103.8 172.7 183.6 214.6 266.1 280.0<br>305.1 368.0 432.6 452.3 468.1 498.3 498.4 516.5 530.7<br>563.0 568.1 598.2 613.7 629.7 632.7 661.5 736.2 751.6<br>761.9 772.3 782.6 807.6 812.0 833.2 849.9 895.5 920.4<br>947.8 952.0 971.4 982.8 995.6 1053.4 1073.8 1099.0<br>1126.2 1141.3 1157.7 1194.5 1205.2 1215.3 1236.6<br>1274.5 1295.3 1309.1 1351.9 1389.7 1405.8 1429.0<br>1435.7 1459.1 1478.1 1494.0 1518.8 1598.8 1616.6<br>1629.5 1636.7 1647.2 2207.1 3155.7 3157.8 3160.7<br>3162.7 3172.1 3173.2 3177.2 3185.8 3187.9    | 0.73629<br>0.28685<br>0.20643 |
| CO           | -113.34134              | N/A                        | 0.00506                   |                   | 2219.8                                                                                                                                                                                                                                                                                                                                                                                                                                                                                                                                              | 58.03862                      |
| e4           | -653.08607              | N/A                        | 0.19848                   | 0.78(0.75)        | 100.7 138.2 201.2 269.6 283.9 303.2 331.7 445.9 460.2<br>467.4 493.9 506.2 546.2 561.6 594.2 602.0 625.3 634.0<br>658.0 666.2 736.3 747.7 751.3 765.9 783.6 794.8 807.3<br>825.1 855.7 893.1 915.5 932.9 960.3 964.9 973.6 982.5                                                                                                                                                                                                                                                                                                                    | 0.89218<br>0.53394<br>0.34677 |

|              |                         |                            |                           |                   | 1003.7 1037.0 1040.7 1099.4 1140.1 1152.4 1173.9<br>1185.5 1203.3 1211.3 1239.4 1269.5 1301.0 1338.0<br>1363.6 1394.5 1411.2 1433.0 1445.4 1477.6 1484.6<br>1527.6 1574.2 1597.3 1608.7 1612.4 1659.1 3157.7<br>3158.8 3159.7 3170.2 3171.2 3175.1 3182.0 3182.9<br>3202.0                                                                                                                                                                                                                                                                                                                    |                               |
|--------------|-------------------------|----------------------------|---------------------------|-------------------|-----------------------------------------------------------------------------------------------------------------------------------------------------------------------------------------------------------------------------------------------------------------------------------------------------------------------------------------------------------------------------------------------------------------------------------------------------------------------------------------------------------------------------------------------------------------------------------------------|-------------------------------|
| eTS1-5       | -766.43590              | 51.6                       | 0.20542                   | 0.77(0.75)        | -633.4 55.5 81.5 117.4 166.7 185.9 244.7 264.3 276.1<br>295.6 350.9 421.5 430.3 443.8 467.7 498.7 518.1 535.7<br>551.9 573.1 584.1 607.6 622.7 628.9 656.9 664.9 747.6<br>752.0 764.9 778.4 796.2 807.5 831.7 854.0 900.8 922.7<br>953.1 956.9 963.0 971.8 983.9 1044.1 1062.3 1078.3<br>1101.6 1136.1 1160.7 1189.2 1203.7 1218.9 1237.3<br>1270.5 1285.5 1325.6 1362.3 1399.5 1401.5 1428.8<br>1430.1 1452.0 1484.3 1496.6 1513.9 1614.5 1622.9<br>1631.8 1639.6 1660.1 1951.5 3136.8 3162.5 3163.0<br>3166.0 3173.4 3175.4 3185.7 3187.4 3187.8                                            | 0.57199<br>0.41801<br>0.24176 |
| eTS5-3       | -766.39279              | 78.6                       | 0.20586                   | 0.77(0.75)        | -557.5 36.6 59.8 96.9 132.5 199.7 244.7 272.6 282.8<br>301.0 379.4 406.2 429.5 448.1 486.2 492.5 513.4 527.9<br>567.5 585.7 615.0 628.1 636.7 652.3 686.2 739.1 757.2<br>768.3 792.1 800.5 804.5 826.5 837.6 888.5 919.0 924.2<br>954.3 961.2 972.3 982.9 986.0 1025.7 1034.3 1043.6<br>1078.9 1143.5 1153.3 1177.4 1178.3 1221.9 1239.0<br>1251.4 1264.6 1297.4 1334.2 1363.4 1395.9 1415.9<br>1429.9 1439.1 1487.2 1493.8 1537.8 1597.3 1620.8<br>1649.0 1668.8 1704.8 2050.6 3099.9 3153.7 3159.8<br>3164.3 3171.2 3172.3 3177.1 3182.9 3187.9                                             | 0.62263<br>0.37569<br>0.24530 |
| eTS1-3       | -766.37670              | 88.7                       | 0.20584                   | 0.77(0.75)        | -636.0 82.9 107.4 125.6 171.9 218.2 240.5 274.6 281.8<br>326.6 427.6 436.2 445.7 472.9 489.7 510.4 535.9 558.2<br>589.5 601.3 619.9 637.5 652.4 668.6 696.7 750.7 760.9<br>767.5 781.2 802.7 809.8 822.2 887.9 899.7 907.8 916.4<br>942.4 964.3 965.4 972.6 983.6 1010.9 1036.5 1042.1<br>1092.1 1128.5 1150.6 1167.9 1171.1 1178.8 1207.2<br>1240.5 1265.2 1292.8 1333.2 1355.0 1394.2 1406.0<br>1420.4 1460.7 1477.9 1486.0 1518.1 1566.2 1583.2<br>1598.5 1619.1 1625.2 1904.4 3139.7 3157.5 3160.3<br>3161.6 3169.7 3174.0 3180.8 3183.7 3185.5                                           | 0.60600<br>0.43953<br>0.27910 |
| eTS3-4       | -766.40737              | 69.5                       | 0.20565                   | 0.77(0.75)        | -428.7 55.3 63.1 99.9 129.5 141.2 205.5 254.2 274.1<br>294.2 330.7 408.2 445.3 460.4 476.9 495.4 516.1 560.9<br>579.9 597.6 609.5 632.7 643.0 661.0 699.6 745.5 753.7<br>769.4 782.9 801.3 810.4 828.1 844.6 900.5 917.2 936.2<br>949.8 960.1 968.5 978.5 985.0 999.1 1037.6 1040.4<br>1135.4 1143.0 1152.7 1174.1 1178.2 1203.7 1212.5<br>1239.6 1270.5 1307.1 1338.3 1368.1 1397.4 1414.5<br>1436.0 1447.8 1483.4 1489.5 1533.5 1584.2 1609.9<br>1624.1 1626.3 1684.6 2012.7 3159.7 3160.3 3160.8<br>3170.8 3172.8 3176.9 3183.1 3184.0 3189.0                                              | 0.62689<br>0.40510<br>0.27271 |
| Oxyradical f |                         |                            |                           |                   |                                                                                                                                                                                                                                                                                                                                                                                                                                                                                                                                                                                               |                               |
| Species      | Total Energy (hartrees) | Relative Energy (kcal/mol) | ZPE (unscaled) (hartrees) | <S <sup>2</sup> > | Frequencies (unscaled) (cm-1)                                                                                                                                                                                                                                                                                                                                                                                                                                                                                                                                                                 | Rotational constants (GHz)    |
| f            | -842.71077              | 0.0                        | 0.22230                   | 0.78(0.75)        | 92.9 137.5 138.6 187.8 269.7 281.4 294.2 320.1 338.6<br>392.3 403.0 434.9 448.0 456.1 481.2 534.3 546.7 554.5<br>574.7 594.0 609.4 629.9 633.7 646.7 666.0 670.4 709.2<br>718.4 761.4 769.2 785.8 806.7 815.9 828.6 832.2 856.1<br>861.0 868.6 929.3 967.1 974.9 979.4 988.3 1012.4<br>1054.3 1087.9 1093.7 1151.1 1159.8 1162.5 1171.9<br>1191.0 1207.1 1225.3 1240.0 1259.4 1316.5 1331.6<br>1359.8 1372.3 1402.9 1426.1 1430.5 1450.3 1451.5<br>1461.9 1470.2 1476.5 1502.4 1575.4 1596.8 1638.1<br>1649.3 1655.1 1660.7 3158.1 3159.1 3162.0 3165.5<br>3175.0 3176.0 3179.4 3182.3 3189.7 | 0.50222<br>0.39415<br>0.22847 |
| f3           | -842.61309              | 61.3                       | 0.22079                   | 0.75(0.75)        | 26.1 90.3 136.1 147.2 181.5 229.3 285.6 302.4 316.2<br>325.0 420.3 444.8 449.2 466.1 493.5 499.8 531.5 553.8<br>558.1 596.9 618.2 624.0 639.1 654.6 669.6 679.8 691.7<br>740.9 760.4 764.5 786.1 805.2 816.0 825.0 828.4 848.9<br>854.5 899.4 905.9 958.9 961.6 972.5 979.6 998.2 1044.6<br>1086.9 1128.2 1144.2 1148.7 1157.1 1164.8 1169.1<br>1193.9 1202.8 1213.2 1234.1 1263.6 1315.2 1328.5<br>1364.5 1378.7 1399.5 1421.3 1428.3 1447.2 1454.5<br>1474.0 1477.5 1500.3 1612.0 1615.7 1628.6 1635.2<br>1647.7 1918.1 3053.0 3155.5 3156.6 3158.5 3159.3<br>3173.0 3174.0 3175.7 3176.5   | 0.55252<br>0.35917<br>0.23292 |
| f5           | -842.66166              | 30.8                       | 0.21948                   | 0.76(0.75)        | 37.3 76.2 83.0 106.1 145.7 195.1 225.8 287.2 295.4<br>329.3 335.1 400.1 436.0 437.1 464.1 471.4 498.0 514.2<br>534.3 550.0 560.5 579.8 606.1 631.2 636.2 650.5 651.4<br>684.3 700.0 760.6 764.8 773.1 776.6 811.8 828.0 835.8                                                                                                                                                                                                                                                                                                                                                                 | 0.53030<br>0.27472<br>0.18097 |

|              |                         |                            |                           |                   | 841.7 847.0 893.2 946.8 948.1 955.8 966.7 973.4 1026.7<br>1069.9 1095.0 1122.7 1142.9 1158.5 1163.3 1202.5<br>1205.9 1226.4 1228.3 1252.0 1277.1 1331.9 1338.2<br>1385.3 1402.5 1424.9 1428.6 1444.7 1447.3 1479.2<br>1481.3 1522.5 1526.9 1580.0 1616.1 1645.5 1671.6<br>1693.3 2207.7 3152.2 3157.3 3157.8 3159.8 3171.4<br>3174.1 3174.6 3175.5 3176.3                                                                                                                                                                                                                                     |                               |
|--------------|-------------------------|----------------------------|---------------------------|-------------------|-----------------------------------------------------------------------------------------------------------------------------------------------------------------------------------------------------------------------------------------------------------------------------------------------------------------------------------------------------------------------------------------------------------------------------------------------------------------------------------------------------------------------------------------------------------------------------------------------|-------------------------------|
| CO           | -113.34134              | N/A                        | 0.00506                   |                   | 2219.8                                                                                                                                                                                                                                                                                                                                                                                                                                                                                                                                                                                        | 58.03862                      |
| f4           | -729.28569              | N/A                        | 0.21115                   | 0.78(0.75)        | 136.8 158.2 203.4 284.5 293.4 321.8 341.7 421.4 444.1<br>445.5 473.6 495.0 495.7 554.2 561.8 582.8 589.2 613.3<br>646.0 655.0 658.8 663.5 685.8 709.9 746.6 753.1 774.0<br>780.0 799.6 813.5 815.4 841.6 842.6 883.5 921.2 955.0<br>958.6 966.9 973.7 1011.2 1055.1 1084.8 1105.7 1142.8<br>1159.3 1159.3 1183.7 1187.7 1207.8 1211.8 1238.4<br>1258.5 1306.7 1319.7 1375.7 1386.3 1402.4 1414.6<br>1427.3 1431.4 1448.9 1453.9 1467.3 1492.9 1560.8<br>1586.2 1605.3 1606.9 1622.9 3153.5 3154.5 3156.0<br>3156.2 3170.9 3172.0 3173.4 3174.0 3197.8                                         | 0.62016<br>0.56158<br>0.32054 |
| fts1-5       | -842.63550              | 47.2                       | 0.21805                   | 0.77(0.75)        | -808.1 63.7 109.0 128.9 160.1 179.5 244.2 289.0 294.3<br>320.6 334.4 389.3 426.9 434.1 446.7 481.1 504.9 527.3<br>533.0 549.9 558.9 577.1 600.8 612.1 621.9 646.9 649.8<br>663.8 680.6 737.0 754.7 763.9 770.2 800.9 813.7 823.9<br>832.2 849.1 902.1 927.0 950.0 960.5 969.5 976.4 1003.2<br>1074.7 1092.2 1101.3 1142.8 1158.6 1159.4 1175.7<br>1199.7 1217.9 1232.4 1245.5 1292.1 1323.7 1338.4<br>1387.3 1411.2 1416.5 1425.4 1440.0 1455.7 1459.5<br>1474.7 1491.3 1511.5 1600.3 1621.0 1641.0 1655.7<br>1665.0 1959.6 3139.1 3156.6 3157.7 3159.0 3162.1<br>3173.6 3175.0 3176.1 3180.0 | 0.48538<br>0.37322<br>0.21502 |
| fts5-3       | -842.58808              | 77.0                       | 0.21848                   | 0.78(0.75)        | -591.1 52.0 91.3 137.7 143.6 179.6 248.7 287.6 300.3<br>317.6 378.1 387.5 434.7 443.8 453.3 485.8 491.2 496.8<br>542.0 551.6 561.9 612.0 613.8 630.7 653.2 657.6 666.3<br>686.1 737.8 758.8 762.3 779.1 795.8 812.6 826.4 829.6<br>850.1 881.9 917.6 951.0 960.2 961.9 972.3 979.0 1017.3<br>1052.7 1075.3 1100.5 1143.7 1152.4 1161.9 1167.8<br>1195.4 1215.3 1227.7 1246.4 1259.7 1314.2 1320.0<br>1348.9 1376.3 1412.9 1419.5 1427.5 1444.0 1452.4<br>1468.7 1476.9 1499.3 1612.0 1623.7 1630.7 1643.9<br>1649.8 2069.5 3104.6 3149.6 3154.8 3155.8 3160.3<br>3166.9 3172.3 3173.4 3178.2  | 0.53197<br>0.34212<br>0.21907 |
| fts1-3       | -842.57720              | 83.8                       | 0.21855                   | 0.78(0.75)        | -649.5 95.1 124.5 142.2 182.4 200.2 262.8 300.8 306.0<br>317.3 390.8 433.2 446.1 447.4 472.3 492.7 523.1 536.2<br>550.2 558.9 606.2 614.5 640.7 644.1 647.6 669.4 674.7<br>689.9 751.6 762.1 770.5 774.7 792.9 803.7 819.6 839.7<br>864.9 875.7 920.9 953.4 957.7 964.7 970.2 976.0 1014.7<br>1027.3 1071.0 1101.2 1137.9 1153.1 1161.9 1163.2<br>1186.0 1194.4 1211.2 1231.8 1252.7 1312.4 1322.7<br>1350.3 1384.5 1405.0 1417.7 1423.4 1430.4 1441.6<br>1455.2 1471.1 1497.8 1530.3 1593.2 1608.0 1619.8<br>1626.8 1899.3 3139.6 3155.1 3155.9 3157.0 3158.6<br>3172.7 3173.8 3175.5 3180.3 | 0.54111<br>0.38203<br>0.24554 |
| fts3-4       | -842.60689              | 65.2                       | 0.21843                   | 0.77(0.75)        | -432.2 62.0 69.1 135.8 147.2 157.0 194.8 271.3 302.9<br>311.8 325.2 404.5 432.5 445.7 459.1 478.8 500.0 504.1<br>556.4 561.2 599.7 611.1 619.3 651.4 655.5 666.0 676.6<br>702.8 713.2 756.7 774.3 780.0 804.5 816.4 817.1 833.9<br>843.0 894.8 910.1 956.2 958.4 969.6 969.6 976.7 1005.4<br>1057.4 1097.7 1128.9 1142.1 1155.6 1160.6 1172.7<br>1187.8 1210.9 1212.1 1241.1 1262.0 1313.8 1326.2<br>1373.1 1383.3 1398.4 1417.7 1429.4 1444.6 1450.6<br>1467.8 1475.7 1499.0 1593.4 1611.3 1613.1 1618.6<br>1629.3 2014.0 3154.8 3155.8 3157.9 3158.1 3172.2<br>3173.3 3175.1 3175.6 3187.5  | 0.53814<br>0.36671<br>0.24152 |
| Oxyradical g |                         |                            |                           |                   |                                                                                                                                                                                                                                                                                                                                                                                                                                                                                                                                                                                               |                               |
| Species      | Total Energy (hartrees) | Relative Energy (kcal/mol) | ZPE (unscaled) (hartrees) | <S <sup>2</sup> > | Frequencies (unscaled) (cm <sup>-1</sup> )                                                                                                                                                                                                                                                                                                                                                                                                                                                                                                                                                    | Rotational constants (GHz)    |
| g            | -1531.11380             | 0.0                        | 0.37862                   | 0.80              | 60.2 73.6 93.1 133.9 147.3 165.8 197.3 225.4 237.4<br>246.4 263.8 278.4 290.9 310.8 317.7 329.6 339.4 362.3<br>369.0 389.8 395.2 405.9 424.3 440.1 444.7 456.0 473.5<br>483.9 493.7 505.1 513.8 527.9 543.7 556.5 559.9 579.7<br>587.9 592.9 597.0 602.7 618.7 627.0 638.2 642.2 649.6<br>659.9 668.9 686.0 687.9 713.9 724.3 730.1 737.0 739.5<br>746.9 761.6 768.4 771.2 788.1 790.1 796.4 798.2 817.6<br>826.7 838.1 844.7 846.7 863.2 874.3 876.3 891.0 902.3<br>907.4 930.5 946.1 968.3 973.8 980.4 983.7 992.4 1003.8<br>1034.4 1079.2 1096.9 1121.4 1141.0 1158.5 1167.9               | 0.14642<br>0.11654<br>0.06934 |

|        |             |      |         |      |                                                                                                                                                                                                                                                                                                                                                                                                                                                                                                                                                                                                                                                                                                                                                                                                                                                                                                                                                                                                                                                            |                               |
|--------|-------------|------|---------|------|------------------------------------------------------------------------------------------------------------------------------------------------------------------------------------------------------------------------------------------------------------------------------------------------------------------------------------------------------------------------------------------------------------------------------------------------------------------------------------------------------------------------------------------------------------------------------------------------------------------------------------------------------------------------------------------------------------------------------------------------------------------------------------------------------------------------------------------------------------------------------------------------------------------------------------------------------------------------------------------------------------------------------------------------------------|-------------------------------|
|        |             |      |         |      | 1170.7 1175.0 1184.0 1188.7 1203.1 1213.0 1215.5<br>1226.7 1229.0 1256.2 1258.9 1266.5 1297.1 1316.9<br>1326.6 1331.2 1337.2 1354.5 1366.3 1377.1 1387.3<br>1394.0 1394.8 1402.9 1410.6 1415.6 1426.2 1429.1<br>1440.6 1448.5 1455.1 1465.9 1479.0 1490.3 1512.7<br>1514.2 1527.3 1538.0 1547.4 1571.8 1585.6 1593.9<br>1613.7 1618.8 1621.0 1631.4 1639.5 1655.5 1663.1<br>3158.1 3158.6 3159.4 3161.0 3161.9 3162.4 3166.5<br>3176.6 3176.7 3177.9 3178.9 3179.9 3181.4                                                                                                                                                                                                                                                                                                                                                                                                                                                                                                                                                                                  |                               |
| g3     | -1531.04244 | 44.8 | 0.37755 | 0.75 | 23.3 64.9 75.9 87.6 129.6 153.5 161.0 196.6 213.5 234.5<br>237.6 258.3 287.5 298.1 325.6 329.0 342.6 357.9 363.5<br>367.1 393.6 397.2 404.2 441.9 446.6 452.1 469.7 472.2<br>489.1 499.8 504.5 519.1 528.0 542.8 571.3 573.0 578.9<br>585.3 595.8 599.8 612.1 624.6 637.7 640.8 649.9 656.3<br>667.5 674.8 714.2 724.7 725.2 738.0 740.9 743.4 752.5<br>764.7 770.6 782.2 789.9 794.5 795.0 798.6 805.5 813.6<br>835.0 840.3 849.2 863.0 874.8 887.4 889.9 900.1 902.3<br>905.9 944.7 966.6 967.7 980.4 980.8 984.9 999.2 1017.7<br>1060.9 1095.2 1104.4 1141.8 1149.2 1168.1 1169.6<br>1172.8 1179.2 1188.0 1195.1 1206.3 1210.4 1214.3<br>1220.0 1231.0 1249.2 1264.4 1267.2 1291.5 1320.2<br>1320.5 1325.8 1347.2 1354.6 1371.9 1376.0 1388.9<br>1396.3 1401.7 1404.3 1412.4 1420.3 1438.4 1449.3<br>1453.2 1462.9 1481.7 1490.3 1509.4 1519.5 1525.1<br>1533.5 1544.9 1553.2 1581.4 1597.7 1611.6 1615.6<br>1617.5 1626.0 1634.4 1642.4 1650.6 1919.5 3085.6<br>3156.6 3157.1 3157.7 3158.4 3159.0 3160.2 3163.1<br>3167.2 3174.5 3174.9 3176.5 3177.0 | 0.14002<br>0.12273<br>0.07181 |
| g5     | -1531.02423 | 56.2 | 0.37513 | 0.76 | 24.6 53.8 70.5 76.6 115.8 137.4 139.5 168.5 201.9 213.9<br>233.5 236.5 270.5 285.6 295.6 320.1 331.1 339.1 357.4<br>364.6 380.8 386.2 393.7 421.2 431.4 441.5 455.4 461.9<br>471.0 485.7 493.0 503.4 512.7 532.6 543.4 547.7 562.4<br>571.3 579.4 582.3 587.9 594.5 612.8 624.3 633.3 640.2<br>643.6 662.6 668.6 674.1 684.4 705.3 723.5 730.5 739.5<br>744.5 758.0 763.9 766.8 780.3 789.2 790.4 795.7 799.0<br>811.3 823.5 836.0 840.0 857.8 867.4 879.0 884.9 895.6<br>903.6 923.2 949.6 966.6 966.7 979.0 980.2 990.1 1010.5<br>1053.2 1088.9 1098.8 1131.3 1137.3 1153.7 1163.8<br>1168.9 1171.2 1180.7 1195.8 1197.1 1212.4 1218.4<br>1225.8 1237.5 1252.9 1266.2 1281.4 1290.0 1308.2<br>1325.9 1335.8 1348.9 1365.7 1375.1 1377.8 1387.6<br>1389.2 1398.0 1405.8 1410.3 1415.9 1427.2 1428.8<br>1448.6 1455.1 1461.2 1480.4 1500.9 1517.0 1525.2<br>1532.7 1544.7 1549.8 1589.8 1602.9 1607.1 1619.9<br>1623.0 1626.8 1627.9 1658.3 1669.7 2201.9 3152.0<br>3152.9 3156.0 3157.0 3157.7 3158.8 3159.6 3160.2<br>3166.3 3174.4 3175.4 3175.9 3177.1 | 0.13759<br>0.11005<br>0.06529 |
| CO     | -113.34134  |      | 0.00506 |      | 2219.8                                                                                                                                                                                                                                                                                                                                                                                                                                                                                                                                                                                                                                                                                                                                                                                                                                                                                                                                                                                                                                                     | 58.03862                      |
| g4     | -1417.72231 |      | 0.36803 | 0.79 | 72.7 76.6 136.7 152.5 174.5 209.1 236.4 243.2 253.5<br>288.2 297.5 327.5 332.3 345.4 353.2 369.6 380.0 384.0<br>401.6 409.6 440.5 447.0 447.7 470.6 475.4 488.7 497.9<br>510.7 522.0 539.2 565.1 579.4 580.9 582.8 589.7 592.8<br>601.3 617.4 622.7 635.1 649.1 659.1 664.5 672.5 711.5<br>722.4 729.0 733.8 737.1 738.4 743.2 755.0 760.0 760.4<br>771.6 786.8 791.5 794.3 796.4 801.2 831.8 835.8 847.4<br>857.7 872.3 875.5 876.0 893.3 903.1 911.3 961.2 965.2<br>965.4 978.6 978.8 1002.8 1007.4 1035.1 1080.6 1090.2<br>1118.8 1129.1 1164.9 1167.2 1170.5 1171.6 1182.6<br>1199.2 1199.4 1212.4 1216.6 1219.6 1230.7 1247.1<br>1262.8 1266.4 1289.7 1320.0 1322.8 1325.2 1347.0<br>1349.5 1368.9 1368.9 1373.3 1395.9 1399.7 1406.0<br>1411.1 1414.3 1428.4 1437.0 1447.0 1450.9 1469.9<br>1483.9 1490.2 1496.3 1509.7 1527.6 1529.4 1541.7<br>1573.4 1573.9 1588.0 1613.1 1614.2 1620.6 1628.3<br>1640.4 1648.8 3156.2 3156.4 3157.0 3157.7 3158.6<br>3159.9 3160.7 3161.3 3174.0 3174.1 3176.1 3176.4<br>3214.3                                   | 0.18892<br>0.12379<br>0.08274 |
| gTS1-5 | -1531.02232 | 57.4 | 0.37454 | 0.76 | -122.0 43.1 70.4 74.3 116.6 137.9 146.3 172.3 205.4<br>215.6 236.2 254.3 272.0 289.2 298.8 301.6 322.1 334.5<br>352.1 356.1 363.4 385.0 391.4 420.1 432.4 442.9 448.2<br>458.0 468.5 480.1 490.5 493.8 512.2 520.0 532.0 542.6<br>566.3 572.0 577.6 580.3 589.1 596.0 617.2 623.5 626.0<br>635.1 644.8 658.2 665.6 672.0 684.0 709.1 715.8 728.0<br>736.3 740.9 747.5 758.3 761.4 771.8 779.8 788.2 795.4<br>796.8 816.8 823.1 835.4 837.2 857.4 866.3 878.1 881.9<br>894.3 903.0 911.2 942.0 966.6 967.3 978.7 980.8 990.9                                                                                                                                                                                                                                                                                                                                                                                                                                                                                                                                | 0.13884<br>0.11656<br>0.06728 |

|        |             |      |         |      |                                                                                                                                                                                                                                                                                                                                                                                                                                                                                                                                                                                                                                                                                                                                                                                                                                                                                                                                                                                                                                                               |                               |
|--------|-------------|------|---------|------|---------------------------------------------------------------------------------------------------------------------------------------------------------------------------------------------------------------------------------------------------------------------------------------------------------------------------------------------------------------------------------------------------------------------------------------------------------------------------------------------------------------------------------------------------------------------------------------------------------------------------------------------------------------------------------------------------------------------------------------------------------------------------------------------------------------------------------------------------------------------------------------------------------------------------------------------------------------------------------------------------------------------------------------------------------------|-------------------------------|
|        |             |      |         |      | 1014.9 1054.0 1088.1 1092.0 1129.1 1138.3 1160.8<br>1166.3 1170.6 1173.2 1186.8 1197.1 1200.1 1214.9<br>1216.8 1229.3 1242.3 1256.3 1263.7 1281.5 1296.9<br>1313.3 1328.3 1335.7 1343.8 1366.9 1371.7 1383.1<br>1389.5 1395.6 1401.8 1405.7 1415.1 1421.0 1428.0<br>1440.2 1449.5 1456.2 1460.3 1480.9 1500.0 1519.2<br>1526.7 1534.3 1542.5 1549.5 1587.6 1600.3 1609.4<br>1619.4 1621.9 1625.0 1628.7 1656.0 1666.7 2106.6<br>3125.8 3156.4 3157.1 3157.8 3158.4 3159.6 3160.0<br>3160.6 3164.0 3174.7 3176.0 3176.3 3177.7                                                                                                                                                                                                                                                                                                                                                                                                                                                                                                                                 |                               |
| gTS5-3 | -1531.00304 | 69.5 | 0.37472 | 0.77 | -515.7 40.4 70.0 75.4 85.7 132.1 143.5 164.8 193.7<br>211.3 234.3 245.2 281.1 294.5 305.7 322.4 325.7 337.1<br>345.4 359.6 362.8 389.7 394.9 406.7 425.8 438.1 451.8<br>459.4 473.9 485.6 489.2 496.8 507.0 525.4 545.5 549.4<br>572.4 572.9 584.4 592.5 595.0 599.6 624.3 626.3 635.9<br>644.3 656.9 664.8 673.7 676.2 707.3 726.0 733.0 737.6<br>739.1 750.1 753.7 764.2 771.2 787.9 792.8 795.2 798.4<br>809.8 818.3 832.6 837.9 845.8 863.8 876.7 880.6 891.6<br>894.4 903.2 914.7 954.8 966.7 967.1 979.3 980.6 991.7<br>1014.9 1040.7 1077.8 1093.3 1106.3 1131.4 1152.9<br>1168.3 1172.1 1179.2 1185.2 1191.6 1197.9 1210.7<br>1213.8 1220.6 1245.8 1259.5 1261.4 1272.6 1296.4<br>1307.4 1317.0 1325.6 1343.5 1353.9 1371.8 1380.0<br>1385.7 1393.1 1394.7 1401.4 1409.2 1420.9 1428.5<br>1444.3 1448.4 1454.7 1459.6 1482.8 1494.0 1518.2<br>1521.3 1527.4 1541.1 1550.8 1580.8 1595.1 1599.4<br>1616.4 1619.7 1621.5 1624.4 1647.7 1656.2 2119.9<br>3124.4 3141.5 3155.7 3156.5 3157.2 3158.0 3158.7<br>3159.8 3167.7 3173.4 3174.7 3175.4 3176.4   | 0.13463<br>0.11972<br>0.06833 |
| gTS1-3 | -1531.00582 | 67.8 | 0.37521 | 0.79 | -665.8 61.7 75.3 85.3 127.1 145.9 156.7 174.3 209.9<br>233.9 235.8 256.5 285.5 298.4 311.9 328.8 332.9 349.9<br>356.4 365.0 391.5 398.0 405.6 414.7 440.9 444.9 460.8<br>469.9 472.7 487.1 498.9 507.4 515.0 525.0 546.6 571.5<br>574.6 583.6 583.8 592.9 597.8 616.9 625.4 635.8 646.8<br>652.2 663.2 675.5 684.1 709.0 711.9 724.3 735.3 739.4<br>746.5 751.3 763.8 769.6 782.3 789.3 791.5 797.8 798.3<br>809.9 823.3 836.9 843.1 851.2 865.3 877.1 888.2 892.0<br>902.2 921.1 955.8 964.5 965.7 977.6 979.5 996.1 1008.3<br>1016.6 1050.1 1054.2 1086.5 1102.1 1128.0 1149.7<br>1167.9 1169.5 1173.3 1182.8 1194.5 1202.7 1203.7<br>1214.0 1217.0 1226.9 1244.9 1260.2 1267.0 1291.3<br>1315.6 1320.0 1324.5 1347.1 1350.3 1361.9 1367.8<br>1375.1 1392.4 1395.7 1402.8 1408.2 1417.8 1433.4<br>1437.0 1446.5 1459.6 1470.4 1480.1 1486.5 1508.4<br>1517.5 1531.1 1531.7 1547.1 1567.4 1584.6 1600.2<br>1610.8 1616.7 1626.3 1626.7 1640.4 1649.5 1849.4<br>3055.4 3156.4 3157.0 3157.7 3158.6 3159.3 3160.1<br>3167.8 3174.0 3174.7 3175.9 3176.2 3177.2 | 0.14324<br>0.12106<br>0.07171 |
| gTS3-4 | -1531.03896 | 47.0 | 0.37533 | 0.77 | -462.0 56.7 58.2 75.5 78.8 131.8 140.7 161.1 166.2<br>213.6 220.0 237.3 247.9 287.3 298.2 322.0 329.3 343.2<br>358.4 358.5 368.8 390.4 396.7 400.6 442.8 447.0 447.9<br>468.3 471.1 473.7 489.7 501.5 513.0 524.0 541.7 570.3<br>575.8 580.2 585.9 594.5 596.5 611.5 624.7 625.3 638.2<br>650.2 661.1 674.0 695.1 713.1 726.6 727.9 734.9 741.3<br>743.9 755.4 768.5 769.7 772.7 788.1 794.2 795.7 798.5<br>803.1 834.1 838.1 846.5 861.1 873.8 885.7 886.3 892.4<br>902.2 906.3 952.9 966.3 966.4 980.3 980.4 997.0 1002.3<br>1019.9 1020.7 1074.4 1095.1 1110.6 1146.3 1150.9<br>1169.4 1171.6 1176.0 1183.9 1198.9 1204.0 1205.4<br>1213.6 1214.1 1227.5 1248.4 1262.2 1267.8 1292.0<br>1320.7 1322.1 1325.7 1347.8 1354.1 1371.5 1372.8<br>1390.7 1396.3 1399.6 1404.4 1411.7 1417.5 1435.0<br>1447.6 1451.5 1458.0 1479.6 1488.0 1501.3 1513.0<br>1521.0 1532.1 1538.3 1549.8 1580.2 1594.8 1599.6<br>1615.2 1616.6 1622.4 1630.9 1641.0 1649.6 1982.6<br>3156.4 3156.9 3157.3 3158.1 3158.9 3159.7 3163.2<br>3163.5 3174.6 3174.6 3176.5 3176.8 3186.1  | 0.14115<br>0.12248<br>0.07275 |

**Table S2.** Cartesian coordinates of optimized structures at B3LYP/6-311G(d,p) level for oxyradicals a-g.

| Species Name | Geometry (Å)                    |
|--------------|---------------------------------|
| a            | C 3.409567 -0.795807 -0.000307  |
|              | C 3.349971 0.566817 -0.000280   |
|              | C 2.065872 1.232369 0.000098    |
|              | C 0.971257 0.372422 0.000637    |
|              | C 0.943493 -1.040443 0.000468   |
|              | C 2.230498 -1.710220 -0.000048  |
|              | H 4.366074 -1.306270 -0.000606  |
|              | H 4.265665 1.149926 -0.000588   |
|              | C -0.335527 0.870671 0.000677   |
|              | C -1.215538 -0.210963 0.000604  |
|              | C -2.588309 -0.028338 0.000094  |
|              | C -3.336157 -1.243359 -0.000347 |
|              | C -2.666803 -2.461078 -0.000331 |
|              | C -1.246795 -2.589972 0.000020  |
|              | C -0.484875 -1.433695 0.000479  |
|              | H -4.420881 -1.228950 -0.000743 |
|              | H -3.255571 -3.371614 -0.000682 |
|              | H -0.791501 -3.572852 -0.000192 |
|              | O 2.375997 -2.941574 -0.000233  |
|              | C 1.743007 2.627340 -0.000218   |
|              | H 2.549971 3.352611 -0.000617   |
|              | C 0.430698 3.099337 -0.000129   |
|              | H 0.266567 4.171908 -0.000477   |
|              | C -0.696027 2.199977 0.000172   |
|              | C -3.015483 1.354142 -0.000218  |
|              | H -4.078441 1.572470 -0.000532  |
|              | C -2.124261 2.414132 -0.000218  |
|              | H -2.517395 3.425364 -0.000629  |
| a3           | C 2.639573 -0.613724 -0.414727  |
|              | C 2.978720 0.870879 -0.120051   |
|              | C 1.835746 1.622215 -0.213854   |
|              | C 0.819622 0.706350 -0.603416   |
|              | C -0.553334 0.936690 -0.450852  |
|              | C -1.161253 -0.314683 -0.433600 |
|              | C -2.476825 -0.450487 -0.007785 |
|              | C -2.912519 -1.800261 0.147658  |
|              | C -2.001942 -2.828176 -0.038266 |
|              | C -0.619566 -2.630152 -0.349250 |
|              | C -0.157999 -1.344741 -0.550607 |
|              | C 1.141182 -0.614711 -0.672929  |
|              | C 3.127711 -1.546621 0.718411   |
|              | H 3.228843 -0.969112 -1.274380  |
|              | H 3.978962 1.179183 0.152506    |
|              | H -3.928400 -2.028452 0.451828  |
|              | H -2.339553 -3.848313 0.109127  |
|              | H 0.043533 -3.487383 -0.364967  |
|              | O 2.619927 -2.531411 1.112107   |
|              | C -1.067316 2.104281 0.047051   |
|              | C 1.301963 2.941285 0.150690    |
|              | H 1.977373 3.756191 0.386263    |
|              | C -0.052032 3.154302 0.267496   |
|              | H -0.384540 4.134654 0.594512   |
|              | C -3.122013 0.784756 0.366744   |
|              | H -4.158312 0.755019 0.688092   |
|              | C -2.451926 2.003879 0.418722   |
|              | H -2.984072 2.873002 0.791547   |
| a5           | C 3.536822 -0.712201 -0.000048  |
|              | C 3.063298 0.640590 0.000014    |
|              | C 1.736508 0.992573 0.000025    |
|              | C 0.636009 0.046408 -0.000035   |
|              | C -0.698510 0.633347 -0.000095  |
|              | C -1.651097 -0.377170 -0.000113 |
|              | C -3.022515 -0.135860 -0.000056 |
|              | C -3.836197 -1.301166 0.000036  |
|              | C -3.237594 -2.554897 0.000086  |
|              | C -1.829553 -2.756707 0.000063  |
|              | C -1.003186 -1.646842 -0.000041 |
|              | C 0.416078 -1.312381 -0.000006  |
|              | C 4.821021 -1.044538 -0.000018  |
|              | H 2.838168 -1.545061 -0.000109  |
|              | H 3.805390 1.432307 0.000057    |
|              | H -4.917991 -1.221025 0.000077  |



|     |                                                                                                                                                                                                                                                                                                                                                                                                                                                                                                                                                                                                                                                                                                                                                                                                                                                                                                                                                                          |
|-----|--------------------------------------------------------------------------------------------------------------------------------------------------------------------------------------------------------------------------------------------------------------------------------------------------------------------------------------------------------------------------------------------------------------------------------------------------------------------------------------------------------------------------------------------------------------------------------------------------------------------------------------------------------------------------------------------------------------------------------------------------------------------------------------------------------------------------------------------------------------------------------------------------------------------------------------------------------------------------|
|     | H -3.874657 -3.432597 0.000162<br>H -1.436599 -3.767313 0.000137<br>O 5.936653 -1.351060 0.000010<br>C -1.030533 1.968573 -0.000046<br>C 1.368090 2.408967 0.000092<br>H 2.190397 3.117517 0.000144<br>C 0.092595 2.887049 0.000074<br>H -0.081955 3.957460 0.000228<br>C -3.391630 1.251734 -0.000029<br>H -4.442441 1.522854 0.000000<br>C -2.437872 2.254892 -0.000030<br>H -2.763931 3.290100 -0.000010                                                                                                                                                                                                                                                                                                                                                                                                                                                                                                                                                              |
| a6  | C 3.898198 -0.712851 0.000007<br>C 3.538613 0.551285 0.000033<br>C 2.165963 1.056779 0.000039<br>C 1.045224 0.223456 0.000019<br>C 0.785340 -1.231393 -0.000001<br>C 1.619295 -2.267643 -0.000019<br>H 4.785645 -1.324284 -0.000003<br>H 4.328592 1.311292 0.000050<br>C -0.221156 0.838764 0.000026<br>C -1.239634 -0.122387 -0.000009<br>C -2.596558 0.205961 -0.000018<br>C -3.483558 -0.893742 -0.000064<br>C -2.972991 -2.189504 -0.000099<br>C -1.588614 -2.483547 -0.000089<br>C -0.698750 -1.421753 -0.000041<br>H -4.556988 -0.738456 -0.000074<br>H -3.669044 -3.021179 -0.000133<br>H -1.261492 -3.517362 -0.000113<br>O 2.183482 -3.280232 -0.000052<br>C 1.926765 2.461048 0.000070<br>H 2.794658 3.112881 0.000088<br>C 0.664436 3.038445 0.000081<br>H 0.568520 4.118727 0.000105<br>C -0.481870 2.210757 0.000056<br>C -2.879045 1.623016 0.000020<br>H -3.914029 1.949521 0.000016<br>C -1.880587 2.568478 0.000055<br>H -2.150150 3.619709 0.000078    |
| a7  | C 2.518584 -0.415861 -0.946582<br>C 2.787726 0.915462 -0.980301<br>C 1.779482 1.665599 -0.195702<br>C 1.016711 0.692525 0.402244<br>C -0.345986 0.848950 0.534800<br>C -0.956391 -0.393122 0.246630<br>C -2.335134 -0.494808 0.060019<br>C -2.786985 -1.763606 -0.376351<br>C -1.866998 -2.769498 -0.650641<br>C -0.462617 -2.588293 -0.552882<br>C 0.006025 -1.360820 -0.131527<br>C 1.408299 -0.715409 0.063291<br>C 2.108212 -1.526165 1.229590<br>H 3.112432 -1.189905 -1.413929<br>H 3.584156 1.361130 -1.563764<br>H -3.844514 -1.947860 -0.533733<br>H -2.234579 -3.728952 -0.997306<br>H 0.205154 -3.392749 -0.838408<br>O 2.570171 -2.602332 1.132356<br>C -0.997714 2.073928 0.394126<br>C 1.203664 2.967028 -0.258461<br>H 1.767361 3.801712 -0.660894<br>C -0.136988 3.170190 0.084788<br>H -0.552942 4.166719 -0.023676<br>C -3.068535 0.750174 0.189433<br>H -4.149110 0.728003 0.092505<br>C -2.439534 1.968463 0.317671<br>H -3.040253 2.872129 0.299497 |
| a10 | C -3.656071 -0.306878 0.000027<br>C -3.081831 0.910237 0.000254<br>C -1.666623 1.181316 0.000030<br>C -0.650655 0.192504 -0.000271<br>C 0.691799 0.671915 -0.000501<br>C 1.571566 -0.412822 -0.000526<br>C 2.950801 -0.271578 -0.000149<br>C 3.674102 -1.498140 0.000230                                                                                                                                                                                                                                                                                                                                                                                                                                                                                                                                                                                                                                                                                                 |

|     |                                 |
|-----|---------------------------------|
|     | C 2.983702 -2.706159 0.000331   |
|     | C 1.567950 -2.798972 0.000131   |
|     | C 0.827275 -1.621100 -0.000290  |
|     | C -0.576076 -1.239808 -0.000157 |
|     | C -4.747972 -0.986005 0.000042  |
|     | H -1.422989 -1.908755 0.000154  |
|     | H -3.712879 1.802768 0.000583   |
|     | H 4.758822 -1.500004 0.000483   |
|     | H 3.555318 -3.627549 0.000636   |
|     | H 1.097133 -3.775799 0.000369   |
|     | O -5.641443 -1.746319 -0.000016 |
|     | C 1.128577 1.986213 -0.000159   |
|     | C -1.236563 2.551023 0.000193   |
|     | H -2.012315 3.309839 0.000417   |
|     | C 0.083656 2.961514 0.000142    |
|     | H 0.316740 4.020777 0.000365    |
|     | C 3.426016 1.090498 0.000057    |
|     | H 4.494903 1.277335 0.000283    |
|     | C 2.558983 2.163325 0.000045    |
|     | H 2.965011 3.169439 0.000258    |
| a11 | C -2.520688 0.083481 -0.019945  |
|     | C -2.456965 1.514121 -0.281300  |
|     | C -1.194476 2.009768 0.156743   |
|     | C -0.532988 0.947866 0.762289   |
|     | C 0.816271 0.766395 0.555890    |
|     | C 1.057062 -0.616056 0.385944   |
|     | C 2.296321 -1.083985 -0.056104  |
|     | C 2.348595 -2.475443 -0.317593  |
|     | C 1.198829 -3.245256 -0.193501  |
|     | C -0.066992 -2.704311 0.158938  |
|     | C -0.150631 -1.353905 0.429347  |
|     | C -1.279725 -0.358273 0.819510  |
|     | C -3.528412 -0.728856 -0.307649 |
|     | H -1.626854 -0.602231 1.831392  |
|     | H -3.213462 2.055800 -0.831366  |
|     | H 3.270968 -2.939430 -0.651045  |
|     | H 1.256547 -4.304561 -0.418853  |
|     | H -0.937384 -3.351441 0.165307  |
|     | O -4.392110 -1.458285 -0.585324 |
|     | C 1.672269 1.760304 0.077741    |
|     | C -0.359954 3.127619 -0.209146  |
|     | H -0.805905 4.041352 -0.586259  |
|     | C 1.023683 3.010332 -0.205815   |
|     | H 1.614503 3.854363 -0.547771   |
|     | C 3.287336 -0.060805 -0.314958  |
|     | H 4.281355 -0.365150 -0.625822  |
|     | C 2.983159 1.286771 -0.283418   |
|     | H 3.740941 1.998964 -0.594821   |
| CO  | C 0.000000 0.000000 -0.643976   |
|     | O 0.000000 0.000000 0.482982    |
| a4  | C 1.685666 -2.530321 -0.170025  |
|     | C 2.852682 -1.731217 -0.284868  |
|     | C 2.535758 -0.325475 0.055551   |
|     | C 1.227168 -0.418893 0.452657   |
|     | C 0.319821 0.599755 0.448465    |
|     | C -0.954835 0.007122 0.329148   |
|     | C -2.062167 0.792112 0.038436   |
|     | C -3.253870 0.060899 -0.203580  |
|     | C -3.218781 -1.332853 -0.211419 |
|     | C -2.036574 -2.094350 -0.031348 |
|     | C -0.846805 -1.426859 0.231737  |
|     | C 0.607910 -1.714710 0.264387   |
|     | H 1.651434 -3.579222 -0.430640  |
|     | H 3.807423 -2.106115 -0.632514  |
|     | H -4.187021 0.571857 -0.416597  |
|     | H -4.140726 -1.867838 -0.411372 |
|     | H -2.078807 -3.172629 -0.135208 |
|     | C 0.659720 1.908126 0.131484    |
|     | C 2.966138 1.013198 -0.184549   |
|     | H 3.984887 1.228776 -0.489762   |
|     | C 2.059374 2.090851 -0.119436   |
|     | H 2.436315 3.080878 -0.354655   |
|     | C -0.505809 2.745755 -0.077624  |
|     | H -0.384258 3.807124 -0.269301  |
|     | C -1.781381 2.215436 -0.097504  |
|     | H -2.613344 2.885717 -0.289029  |

|                               |           |           |           |           |
|-------------------------------|-----------|-----------|-----------|-----------|
| C <sub>2</sub> H <sub>2</sub> | C         | 0.000000  | 0.000000  | 0.598990  |
|                               | C         | 0.000000  | 0.000000  | -0.598990 |
|                               | H         | 0.000000  | 0.000000  | 1.661939  |
|                               | H         | 0.000000  | 0.000000  | -1.661939 |
| a8                            | C         | 1.667081  | 2.210862  | 0.000079  |
|                               | C         | 0.553944  | 1.418085  | 0.000030  |
|                               | C         | -0.929198 | 1.519630  | -0.000068 |
|                               | C         | -1.630092 | 2.641313  | -0.000072 |
|                               | C         | 0.841743  | 0.029071  | -0.000016 |
|                               | C         | -0.346115 | -0.712978 | -0.000015 |
|                               | C         | -0.361979 | -2.109557 | -0.000021 |
|                               | C         | -1.647022 | -2.696506 | 0.000019  |
|                               | C         | -2.776858 | -1.882162 | 0.000074  |
|                               | C         | -2.721670 | -0.468503 | 0.000079  |
|                               | C         | -1.473215 | 0.132750  | 0.000022  |
|                               | H         | -1.761594 | -3.775001 | 0.000016  |
|                               | H         | -3.754237 | -2.352072 | 0.000098  |
|                               | H         | -3.643212 | 0.102509  | 0.000093  |
|                               | O         | -2.247613 | 3.619286  | -0.000065 |
|                               | C         | 2.970233  | 1.717027  | 0.000082  |
|                               | H         | 3.811424  | 2.401957  | 0.000118  |
|                               | C         | 3.204878  | 0.336863  | 0.000019  |
|                               | H         | 4.225033  | -0.032097 | 0.000020  |
|                               | C         | 2.109929  | -0.557013 | -0.000023 |
| C                             | 0.941477  | -2.734515 | -0.000067 |           |
| H                             | 1.000157  | -3.818043 | -0.000079 |           |
| C                             | 2.104830  | -2.003510 | -0.000068 |           |
| H                             | 3.055530  | -2.526678 | -0.000079 |           |
| H                             | 0.000000  | 0.000000  | 0.000000  |           |
| a9                            | C         | 4.568534  | 0.257260  | -0.000043 |
|                               | C         | 3.488422  | -0.277913 | -0.000030 |
|                               | C         | 2.199158  | -0.879590 | 0.000011  |
|                               | C         | 1.029551  | -0.117057 | -0.000008 |
|                               | C         | 0.684068  | 1.323646  | -0.000064 |
|                               | C         | 1.519020  | 2.353091  | -0.000114 |
|                               | H         | 5.523085  | 0.723742  | 0.000279  |
|                               | C         | -0.197610 | -0.804724 | 0.000031  |
|                               | C         | -1.268632 | 0.097360  | 0.000005  |
|                               | C         | -2.603382 | -0.311268 | 0.000035  |
|                               | C         | -3.554014 | 0.734336  | 0.000002  |
|                               | C         | -3.120755 | 2.057756  | -0.000055 |
|                               | C         | -1.756098 | 2.433987  | -0.000083 |
|                               | C         | -0.804393 | 1.427340  | -0.000052 |
|                               | H         | -4.616396 | 0.515987  | 0.000021  |
|                               | H         | -3.864757 | 2.846802  | -0.000079 |
|                               | H         | -1.492231 | 3.485625  | -0.000128 |
|                               | O         | 2.207037  | 3.281396  | -0.000159 |
|                               | C         | 2.050652  | -2.300194 | 0.000068  |
|                               | H         | 2.958458  | -2.891727 | 0.000082  |
| C                             | 0.822830  | -2.946138 | 0.000107  |           |
| H                             | 0.791343  | -4.030178 | 0.000150  |           |
| C                             | -0.373083 | -2.189134 | 0.000088  |           |
| C                             | -2.800459 | -1.742844 | 0.000094  |           |
| H                             | -3.814348 | -2.129837 | 0.000119  |           |
| C                             | -1.748109 | -2.628846 | 0.000119  |           |
| H                             | -1.955650 | -3.693977 | 0.000164  |           |
| aTS1-5                        | C         | 3.821670  | -0.378682 | 0.114108  |
|                               | C         | 3.260661  | 0.925685  | 0.060613  |
|                               | C         | 1.929027  | 1.267560  | -0.019945 |
|                               | C         | 0.888486  | 0.281566  | -0.018478 |
|                               | C         | 0.782931  | -1.090056 | 0.055770  |
|                               | C         | 3.301741  | -1.615559 | -0.009815 |
|                               | H         | 4.892461  | -0.462724 | 0.293118  |
|                               | H         | 3.988224  | 1.728031  | 0.124182  |
|                               | C         | -0.472109 | 0.773882  | -0.011670 |
|                               | C         | -1.348950 | -0.302707 | -0.003560 |
|                               | C         | -2.732322 | -0.151822 | 0.009144  |
|                               | C         | -3.465264 | -1.369471 | 0.017273  |
|                               | C         | -2.781538 | -2.579520 | 0.020905  |
|                               | C         | -1.362921 | -2.687287 | 0.024031  |
|                               | C         | -0.611961 | -1.524888 | 0.011590  |
|                               | H         | -4.549997 | -1.364221 | 0.021372  |
|                               | H         | -3.357716 | -3.498323 | 0.026107  |
|                               | H         | -0.903115 | -3.668983 | 0.037246  |
|                               | O         | 3.192822  | -2.760369 | -0.161118 |
|                               | C         | 1.495439  | 2.659763  | -0.036116 |

|        |                                                                                                                                                                                                                                                                                                                                                                                                                                                                                                                                                                                                                                                                                                                                                                                                                                                                                                                                                                            |
|--------|----------------------------------------------------------------------------------------------------------------------------------------------------------------------------------------------------------------------------------------------------------------------------------------------------------------------------------------------------------------------------------------------------------------------------------------------------------------------------------------------------------------------------------------------------------------------------------------------------------------------------------------------------------------------------------------------------------------------------------------------------------------------------------------------------------------------------------------------------------------------------------------------------------------------------------------------------------------------------|
|        | H 2.276666 3.413328 -0.045390<br>C 0.190127 3.064859 -0.033155<br>H -0.043008 4.124037 -0.041886<br>C -0.881219 2.087692 -0.016427<br>C -3.188822 1.211871 -0.000594<br>H -4.255289 1.413099 -0.003384<br>C -2.306145 2.278804 -0.013616<br>H -2.703794 3.288567 -0.022764                                                                                                                                                                                                                                                                                                                                                                                                                                                                                                                                                                                                                                                                                                 |
| aTS1-6 | C -3.321350 -1.766552 0.000000<br>C -3.472117 -0.457241 0.000000<br>C -2.360613 0.482151 0.000000<br>C -1.064589 -0.018826 0.000000<br>C -0.485291 -1.359032 0.000000<br>C -1.127196 -2.539984 0.000000<br>H -3.891922 -2.679828 0.000000<br>H -4.491444 -0.058087 0.000000<br>C 0.000000 0.892088 0.000000<br>C 1.217506 0.204356 0.000000<br>C 2.448723 0.859571 0.000000<br>C 3.578612 0.009707 0.000000<br>C 3.398164 -1.371604 0.000000<br>C 2.127385 -1.998788 0.000000<br>C 1.002520 -1.191114 0.000000<br>H 4.582484 0.420490 0.000000<br>H 4.276710 -2.007619 0.000000<br>H 2.065278 -3.081262 0.000000<br>O -1.296472 -3.698494 0.000000<br>C -2.509368 1.898257 0.000000<br>H -3.515927 2.304595 0.000000<br>C -1.433986 2.780231 0.000000<br>H -1.621942 3.848336 0.000000<br>C -0.105115 2.281341 0.000000<br>C 2.364291 2.303540 0.000000<br>H 3.284694 2.878829 0.000000<br>C 1.161835 2.975521 0.000000<br>H 1.167381 4.060746 0.000000                    |
| aTS1-3 | C 2.435179 -0.954110 -0.798304<br>C 2.910047 0.522482 -0.831195<br>C 1.891402 1.345959 -0.303315<br>C 1.476879 2.730584 -0.272622<br>C 0.154743 3.087196 0.006055<br>C -0.884762 2.116853 0.266768<br>C -2.323732 2.190906 0.270593<br>C -3.107040 1.045037 0.245172<br>C -2.559435 -0.296287 0.164064<br>C -3.195254 -1.534533 -0.106678<br>C -2.413343 -2.664158 -0.342100<br>C -0.994032 -2.660368 -0.366274<br>C -0.322477 -1.473596 -0.096560<br>C 1.045864 -0.900567 -0.142337<br>C 2.972956 -1.485353 0.420673<br>C 0.895656 0.467230 0.131304<br>C -0.417797 0.814307 0.356811<br>C -1.169832 -0.356690 0.230631<br>H 2.613444 -1.562534 -1.693319<br>H 3.903032 0.772643 -1.175470<br>H 2.174771 3.517034 -0.537607<br>H -0.103101 4.140463 -0.042595<br>H -2.819680 3.156249 0.247627<br>H -4.185913 1.162968 0.220015<br>H -4.275837 -1.607421 -0.168349<br>H -2.916777 -3.600103 -0.560008<br>H -0.471635 -3.574632 -0.627028<br>O 3.463945 -1.796751 1.417576 |
| aTS1-7 | C 2.561908 -0.797334 -0.864440<br>C 2.912534 0.556930 -0.965319<br>C 1.964684 1.378343 -0.250637<br>C 1.057693 0.506641 0.320006<br>C -0.269126 0.844216 0.472731<br>C -1.057206 -0.299712 0.216243<br>C -2.443037 -0.204275 0.082986<br>C -3.088961 -1.408513 -0.291065<br>C -2.334657 -2.545099 -0.558401<br>C -0.915406 -2.566974 -0.516564<br>C -0.258087 -1.410650 -0.149854<br>C 1.209774 -0.952432 0.000085                                                                                                                                                                                                                                                                                                                                                                                                                                                                                                                                                         |

|          |           |           |           |           |
|----------|-----------|-----------|-----------|-----------|
|          | C         | 2.239191  | -1.601449 | 0.779923  |
|          | H         | 3.000704  | -1.605205 | -1.434199 |
|          | H         | 3.778300  | 0.903284  | -1.514161 |
|          | H         | -4.167521 | -1.443393 | -0.402996 |
|          | H         | -2.850196 | -3.451198 | -0.857021 |
|          | H         | -0.385036 | -3.466994 | -0.805689 |
|          | O         | 2.506044  | -2.580177 | 1.389785  |
|          | C         | -0.743348 | 2.150805  | 0.363646  |
|          | C         | 1.568586  | 2.757514  | -0.250888 |
|          | H         | 2.254849  | 3.523627  | -0.594479 |
|          | C         | 0.268232  | 3.126680  | 0.083607  |
|          | H         | -0.004417 | 4.174968  | 0.014898  |
|          | C         | -2.984856 | 1.132827  | 0.214585  |
|          | H         | -4.059986 | 1.265899  | 0.152956  |
|          | C         | -2.182305 | 2.250768  | 0.315733  |
|          | H         | -2.648731 | 3.230710  | 0.308173  |
| aTS5-3   | C         | 2.980962  | -0.459796 | -0.517257 |
|          | C         | 2.952443  | 1.038406  | -0.309336 |
|          | C         | 1.693388  | 1.540997  | -0.173904 |
|          | C         | 0.729620  | 0.490466  | -0.174209 |
|          | C         | -0.651689 | 0.770869  | -0.051663 |
|          | C         | -1.325273 | -0.438402 | -0.069382 |
|          | C         | -2.704180 | -0.499488 | 0.075283  |
|          | C         | -3.232298 | -1.825449 | 0.058103  |
|          | C         | -2.363167 | -2.896612 | -0.079995 |
|          | C         | -0.941307 | -2.771775 | -0.202495 |
|          | C         | -0.382304 | -1.511058 | -0.198225 |
|          | C         | 0.969309  | -0.847112 | -0.236346 |
|          | C         | 3.940836  | -1.175570 | 0.172694  |
|          | H         | 2.911217  | -0.798299 | -1.554917 |
|          | H         | 3.874421  | 1.603175  | -0.272347 |
|          | H         | -4.297478 | -2.005918 | 0.156002  |
|          | H         | -2.779118 | -3.898375 | -0.088840 |
|          | H         | -0.341122 | -3.671318 | -0.287679 |
|          | O         | 4.359007  | -1.978265 | 0.907668  |
|          | C         | -1.211739 | 2.007806  | 0.105799  |
|          | C         | 1.122389  | 2.884222  | -0.014389 |
|          | H         | 1.790452  | 3.738582  | -0.001081 |
|          | C         | -0.225674 | 3.099918  | 0.115401  |
|          | H         | -0.574108 | 4.121488  | 0.231582  |
| C        | -3.348407 | 0.781180  | 0.228183  |           |
| H        | -4.427363 | 0.816713  | 0.339890  |           |
| C        | -2.642055 | 1.980409  | 0.245545  |           |
| H        | -3.194075 | 2.906014  | 0.373205  |           |
| aTS5-10  | C         | -3.349951 | -0.470540 | 0.015502  |
|          | C         | -3.002023 | 0.887815  | -0.004272 |
|          | C         | -1.649076 | 1.261224  | -0.047515 |
|          | C         | -0.643501 | 0.256194  | -0.039469 |
|          | C         | 0.703023  | 0.696273  | -0.015778 |
|          | C         | 1.527110  | -0.429839 | -0.019095 |
|          | C         | 2.911212  | -0.339354 | 0.013632  |
|          | C         | 3.580182  | -1.597223 | 0.008588  |
|          | C         | 2.833896  | -2.768774 | -0.014915 |
|          | C         | 1.409173  | -2.799731 | -0.024687 |
|          | C         | 0.716129  | -1.600516 | -0.028539 |
|          | C         | -0.706042 | -1.172524 | 0.042836  |
|          | C         | -4.550897 | -1.019225 | 0.028566  |
|          | H         | -2.385680 | -1.204830 | 0.079581  |
|          | H         | -3.767677 | 1.656180  | 0.058186  |
|          | H         | 4.663673  | -1.650645 | 0.025028  |
|          | H         | 3.362860  | -3.715662 | -0.018710 |
|          | H         | 0.895949  | -3.755259 | -0.028348 |
|          | O         | -5.538815 | -1.625520 | 0.013411  |
|          | C         | 1.170311  | 1.995052  | 0.007105  |
|          | C         | -1.194104 | 2.635194  | -0.031237 |
|          | H         | -1.948432 | 3.415766  | -0.039163 |
|          | C         | 0.133274  | 2.999315  | -0.005861 |
|          | H         | 0.395400  | 4.051988  | 0.004122  |
| C        | 3.429876  | 1.006271  | 0.035821  |           |
| H        | 4.504680  | 1.157062  | 0.051117  |           |
| C        | 2.603902  | 2.117854  | 0.031587  |           |
| H        | 3.054788  | 3.104766  | 0.047294  |           |
| aTS10-11 | C         | -2.835990 | -0.092181 | -0.201631 |
|          | C         | -2.694236 | 1.292236  | -0.196541 |
|          | C         | -1.453714 | 1.776663  | 0.287960  |
|          | C         | -0.646027 | 0.713562  | 0.704814  |

|        |   |           |           |           |
|--------|---|-----------|-----------|-----------|
|        | C | 0.723758  | 0.789368  | 0.428289  |
|        | C | 1.218906  | -0.512313 | 0.284350  |
|        | C | 2.519026  | -0.761546 | -0.145736 |
|        | C | 2.830217  | -2.135222 | -0.319942 |
|        | C | 1.849923  | -3.095649 | -0.097080 |
|        | C | 0.514423  | -2.783822 | 0.277919  |
|        | C | 0.172070  | -1.455560 | 0.457657  |
|        | C | -1.068403 | -0.669197 | 0.796084  |
|        | C | -3.767028 | -0.973891 | -0.437182 |
|        | H | -1.711273 | -1.029650 | 1.589581  |
|        | H | -3.439459 | 1.938367  | -0.649831 |
|        | H | 3.817873  | -2.442923 | -0.646846 |
|        | H | 2.105012  | -4.138878 | -0.247558 |
|        | H | -0.210256 | -3.584870 | 0.374468  |
|        | O | -4.487947 | -1.889116 | -0.568976 |
|        | C | 1.406245  | 1.926653  | 0.025682  |
|        | C | -0.787225 | 3.025954  | 0.005333  |
|        | H | -1.382448 | 3.904520  | -0.220309 |
|        | C | 0.588226  | 3.107191  | -0.093002 |
|        | H | 1.042168  | 4.054999  | -0.362525 |
|        | C | 3.308217  | 0.417840  | -0.415475 |
|        | H | 4.342531  | 0.298084  | -0.721266 |
|        | C | 2.777374  | 1.693061  | -0.351003 |
|        | H | 3.404856  | 2.534413  | -0.626893 |
|        | C | 2.515006  | -0.924263 | -0.513875 |
|        | C | 3.084907  | 0.480279  | -0.291631 |
|        | C | 2.038704  | 1.389905  | -0.286626 |
|        | C | 0.909511  | 0.611624  | -0.618631 |
|        | C | -0.409882 | 0.995013  | -0.424708 |
|        | C | -1.163013 | -0.177230 | -0.425933 |
|        | C | -2.482721 | -0.159779 | 0.008620  |
|        | C | -3.083591 | -1.446968 | 0.119787  |
|        | C | -2.313684 | -2.574275 | -0.127531 |
|        | C | -0.924984 | -2.542715 | -0.464369 |
|        | C | -0.301513 | -1.318707 | -0.615872 |
|        | C | 1.077468  | -0.754860 | -0.755667 |
|        | C | 2.699356  | -1.792366 | 1.057858  |
|        | H | 3.119809  | -1.633799 | -1.078652 |
|        | H | 4.130774  | 0.647461  | -0.072417 |
|        | H | -4.116932 | -1.557973 | 0.430406  |
|        | H | -2.778977 | -3.548005 | -0.018253 |
|        | H | -0.385173 | -3.478848 | -0.549616 |
|        | O | 2.141245  | -2.775961 | 1.294457  |
|        | C | -0.770270 | 2.216929  | 0.089240  |
|        | C | 1.684409  | 2.747995  | 0.122121  |
|        | H | 2.460225  | 3.471362  | 0.347813  |
|        | C | 0.365767  | 3.127165  | 0.290092  |
|        | H | 0.169578  | 4.135515  | 0.640537  |
|        | C | -2.964400 | 1.141479  | 0.415104  |
|        | H | -3.993477 | 1.232336  | 0.748254  |
|        | C | -2.153979 | 2.272148  | 0.476826  |
|        | H | -2.578320 | 3.191401  | 0.867443  |
|        | C | 4.568024  | -0.324370 | 0.719445  |
|        | C | 4.218015  | 0.222818  | -0.305269 |
|        | C | 2.022225  | 1.056469  | -0.125806 |
|        | C | 0.959601  | 0.192897  | -0.085241 |
|        | C | 0.682434  | -1.269931 | -0.087845 |
|        | C | 1.573576  | -2.246727 | -0.121777 |
|        | H | 4.736166  | -0.765618 | 1.672478  |
|        | H | 4.236374  | 0.607628  | -1.298322 |
|        | C | -0.310549 | 0.817732  | -0.029579 |
|        | C | -1.329734 | -0.142333 | -0.000380 |
|        | C | -2.684111 | 0.194259  | 0.055224  |
|        | C | -3.576507 | -0.900787 | 0.078657  |
|        | C | -3.074405 | -2.199503 | 0.046735  |
|        | C | -1.693466 | -2.502409 | -0.009047 |
|        | C | -0.796556 | -1.446255 | -0.033535 |
|        | H | -4.648204 | -0.739387 | 0.121402  |
|        | H | -3.775527 | -3.026754 | 0.065341  |
|        | H | -1.373972 | -3.538244 | -0.031345 |
|        | O | 2.332376  | -3.119831 | -0.150151 |
|        | C | 1.857226  | 2.444741  | -0.093448 |
|        | H | 2.730337  | 3.089312  | -0.111799 |
|        | C | 0.584972  | 3.023325  | -0.037147 |
|        | H | 0.487373  | 4.103820  | -0.016759 |
|        | C | -0.558003 | 2.192688  | -0.004692 |
| aTS3-4 |   |           |           |           |
| aTS6-8 |   |           |           |           |

|        |                                 |
|--------|---------------------------------|
|        | C -2.958617 1.613247 0.080773   |
|        | H -3.991234 1.944196 0.123847   |
|        | C -1.957128 2.553768 0.053101   |
|        | H -2.222305 3.605923 0.075331   |
| aTS6-9 | C 4.334547 0.523666 -0.146102   |
|        | C 3.455751 -0.307250 -0.005790  |
|        | C 2.165424 -0.930693 0.009464   |
|        | C 1.008871 -0.145951 0.008092   |
|        | C 0.687086 1.299502 0.012013    |
|        | C 1.524200 2.327439 0.021222    |
|        | H 5.199955 1.138532 -0.205998   |
|        | H 4.538693 -1.733084 0.782948   |
|        | C -0.229990 -0.813159 0.000820  |
|        | C -1.286231 0.106150 0.001182   |
|        | C -2.627582 -0.280044 -0.005463 |
|        | C -3.560673 0.781067 -0.004525  |
|        | C -3.105599 2.097070 0.002377   |
|        | C -1.734897 2.450315 0.008555   |
|        | C -0.800468 1.427780 0.007843   |
|        | H -4.626449 0.580344 -0.009224  |
|        | H -3.836303 2.898352 0.002958   |
|        | H -1.453361 3.497317 0.013549   |
|        | O 2.196790 3.267320 0.029347    |
|        | C 1.991714 -2.345686 0.002083   |
|        | H 2.889168 -2.952209 0.006186   |
|        | C 0.753230 -2.970586 -0.007365  |
|        | H 0.704328 -4.053846 -0.013398  |
|        | C -0.429387 -2.194254 -0.007139 |
|        | C -2.848709 -1.707991 -0.012715 |
|        | H -3.868866 -2.077988 -0.017980 |
|        | C -1.811469 -2.611248 -0.013604 |
|        | H -2.036393 -3.672735 -0.019508 |
| aTS6-7 | C 2.754814 -0.856483 -1.218693  |
|        | C 3.150189 0.367610 -0.867477   |
|        | C 2.130865 1.157212 -0.143191   |
|        | C 1.105473 0.343004 0.273834    |
|        | C -0.176607 0.849374 0.388327   |
|        | C -1.106528 -0.180792 0.155033  |
|        | C -2.469566 0.078854 0.014520   |
|        | C -3.257013 -1.044845 -0.333598 |
|        | C -2.647913 -2.276260 -0.553542 |
|        | C -1.247026 -2.481146 -0.467753 |
|        | C -0.456079 -1.402151 -0.123813 |
|        | C 1.063065 -1.143831 0.036727   |
|        | C 1.604108 -2.007539 0.978968   |
|        | H 3.301319 -1.664119 -1.690015  |
|        | H 4.113821 0.792431 -1.145746   |
|        | H -4.330283 -0.948981 -0.458967 |
|        | H -3.269178 -3.118916 -0.835950 |
|        | H -0.830719 -3.455213 -0.697109 |
|        | O 2.237846 -2.921730 1.334155   |
|        | C -0.498536 2.207186 0.341735   |
|        | C 1.885839 2.556948 -0.100875   |
|        | H 2.678852 3.245603 -0.372728   |
|        | C 0.616070 3.072652 0.171523    |
|        | H 0.470653 4.147540 0.142650    |
|        | C -2.846455 1.471043 0.153026   |
|        | H -3.897168 1.733842 0.086545   |
|        | C -1.917749 2.478245 0.291825   |
|        | H -2.261763 3.507176 0.318611   |
| aTS7-4 | C 2.536107 -0.227235 -0.973481  |
|        | C 2.730087 1.128662 -0.985390   |
|        | C 1.660037 1.804746 -0.213396   |
|        | C 0.950650 0.768168 0.342816    |
|        | C -0.413460 0.825025 0.514870   |
|        | C -0.931983 -0.459893 0.236506  |
|        | C -2.300720 -0.659808 0.074381  |
|        | C -2.665756 -1.956369 -0.365549 |
|        | C -1.677604 -2.886527 -0.672043 |
|        | C -0.289319 -2.600916 -0.608023 |
|        | C 0.102847 -1.348281 -0.173192  |
|        | C 1.409094 -0.574885 -0.057260  |
|        | C 2.299654 -1.448037 1.354262   |
|        | H 3.172776 -0.951169 -1.463808  |
|        | H 3.515981 1.626414 -1.539919   |
|        | H -3.709265 -2.219591 -0.503081 |

|          |                                                                                                                                                                                                                                                                                                                                                                                                                                                                                                                                                                                                                                                                                                                                                                                                                                                                                                                                                                             |
|----------|-----------------------------------------------------------------------------------------------------------------------------------------------------------------------------------------------------------------------------------------------------------------------------------------------------------------------------------------------------------------------------------------------------------------------------------------------------------------------------------------------------------------------------------------------------------------------------------------------------------------------------------------------------------------------------------------------------------------------------------------------------------------------------------------------------------------------------------------------------------------------------------------------------------------------------------------------------------------------------|
|          | H -1.980281 -3.867359 -1.021686<br>H 0.426315 -3.348688 -0.930089<br>O 2.779424 -2.483555 1.191550<br>C -1.148111 2.003039 0.407452<br>C 0.990840 3.062109 -0.239805<br>H 1.489364 3.948594 -0.617208<br>C -0.362679 3.160341 0.111118<br>H -0.845071 4.129066 0.028528<br>C -3.119260 0.530325 0.226210<br>H -4.197124 0.430057 0.149708<br>C -2.580332 1.791883 0.355035<br>H -3.248638 2.647024 0.358088                                                                                                                                                                                                                                                                                                                                                                                                                                                                                                                                                                 |
| aTS11-12 | C 2.301090 -0.691693 -0.120379<br>C 2.067981 -2.008913 -0.290193<br>C 0.671218 -2.273561 0.146821<br>C 0.263155 -1.099603 0.747115<br>C -1.025171 -0.636056 0.561614<br>C -0.973952 0.765402 0.391887<br>C -2.093935 1.482662 -0.032764<br>C -1.857729 2.850974 -0.309349<br>C -0.567921 3.360063 -0.218409<br>C 0.561824 2.565498 0.113159<br>C 0.362565 1.231484 0.401675<br>C 1.273605 0.026401 0.749141<br>C 4.650409 0.087174 -0.491126<br>H 1.743840 0.187599 1.728351<br>H 2.747386 -2.718923 -0.743371<br>H -2.668091 3.496499 -0.631445<br>H -0.404800 4.405755 -0.455251<br>H 1.551621 3.007458 0.090708<br>O 4.786037 1.186598 -0.252882<br>C -2.071261 -1.428070 0.088000<br>C -0.362506 -3.166855 -0.259436<br>H -0.117190 -4.135709 -0.680636<br>C -1.702089 -2.770761 -0.229151<br>H -2.455876 -3.465772 -0.585431<br>C -3.282408 0.688443 -0.271672<br>H -4.194909 1.195671 -0.567934<br>C -3.269062 -0.688889 -0.243208<br>H -4.165159 -1.227568 -0.534301 |
| b        | C 3.278847 -0.991371 0.000006<br>C 3.208592 0.471345 -0.000219<br>C 1.971671 1.128785 -0.000125<br>C 0.860602 0.280124 -0.000071<br>C 0.827882 -1.163777 -0.000027<br>C 2.030908 -1.795709 0.000044<br>C -0.429641 0.783811 -0.000004<br>C -1.330408 -0.289328 0.000004<br>C -2.704838 -0.080550 0.000060<br>C -3.477614 -1.271757 0.000044<br>C -2.834962 -2.504106 -0.000035<br>C -1.419633 -2.660018 -0.000101<br>C -0.633411 -1.524172 -0.000069<br>H -4.561638 -1.232460 0.000086<br>H -3.442542 -3.402245 -0.000038<br>H -0.997030 -3.658471 -0.000128<br>H 2.163838 -2.871334 0.000099<br>O 4.384030 -1.564199 0.000156<br>C -0.775945 2.124006 0.000041<br>C 1.653214 2.544563 -0.000064<br>H 2.470552 3.257702 -0.000093<br>C 0.355764 3.019351 0.000011<br>H 0.191812 4.091815 0.000039<br>C -2.195851 2.355969 0.000116<br>H -2.574274 3.372805 0.000159<br>C -3.104946 1.309213 0.000131<br>H -4.164061 1.545733 0.000178<br>H 4.159716 0.991776 0.000003       |
| b2       | C 2.841648 -1.193996 0.699629<br>C 2.178315 -1.595647 -0.585421<br>C 0.770366 -1.125808 -0.753488<br>C 0.852650 0.288210 -0.740440<br>C 2.057070 0.896170 -0.479653<br>C 3.058733 -0.232543 -0.419521<br>C -0.378859 0.878943 -0.506795<br>C -1.303603 -0.161768 -0.379211                                                                                                                                                                                                                                                                                                                                                                                                                                                                                                                                                                                                                                                                                                  |



|    |                                                                                                                                                                                                                                                                                                                                                                                                                                                                                                                                                                                                                                                                                                                                                                                                                                                                                                                                                                           |
|----|---------------------------------------------------------------------------------------------------------------------------------------------------------------------------------------------------------------------------------------------------------------------------------------------------------------------------------------------------------------------------------------------------------------------------------------------------------------------------------------------------------------------------------------------------------------------------------------------------------------------------------------------------------------------------------------------------------------------------------------------------------------------------------------------------------------------------------------------------------------------------------------------------------------------------------------------------------------------------|
|    | C -0.643239 -1.438438 -0.508082<br>C -1.449083 -2.545822 -0.249001<br>H -1.066606 -3.559124 -0.299129<br>C -2.796833 -2.333950 0.138360<br>C -3.365580 -1.076204 0.332707<br>C -2.580972 0.087812 0.103411<br>H 2.596231 -2.450465 -1.110431<br>H 4.054180 -0.171209 -0.849623<br>O 3.071206 -1.478012 1.829151<br>H -3.407968 -3.208018 0.335585<br>H -4.386405 -0.999464 0.691295<br>C 1.966367 2.258276 -0.081679<br>H 2.859708 2.831625 0.139540<br>C -0.526269 2.174327 -0.046244<br>C -2.845287 1.478433 0.425323<br>H -3.834317 1.744915 0.784719<br>C 0.717126 2.883657 0.095559<br>H 0.711172 3.916638 0.427578<br>C -1.878533 2.467161 0.377353<br>H -2.139743 3.466325 0.710411                                                                                                                                                                                                                                                                                |
| b3 | C 2.639573 -0.613724 -0.414727<br>C 2.978720 0.870879 -0.120051<br>C 1.835746 1.622215 -0.213854<br>C 0.819622 0.706350 -0.603416<br>C -0.553334 0.936690 -0.450852<br>C -1.161253 -0.314683 -0.433600<br>C -2.476825 -0.450487 -0.007785<br>C -2.912519 -1.800261 0.147658<br>C -2.001942 -2.828176 -0.038266<br>C -0.619566 -2.630152 -0.349250<br>C -0.157999 -1.344741 -0.550607<br>C 1.141182 -0.614711 -0.672929<br>C 3.127711 -1.546621 0.718411<br>H 3.228843 -0.969112 -1.274380<br>H 3.978962 1.179183 0.152506<br>H -3.928400 -2.028452 0.451828<br>H -2.339553 -3.848313 0.109127<br>H 0.043533 -3.487383 -0.364967<br>O 2.619927 -2.531411 1.112107<br>C -1.067316 2.104281 0.047051<br>C 1.301963 2.941285 0.150690<br>H 1.977373 3.756191 0.386263<br>C -0.052032 3.154302 0.267496<br>H -0.384540 4.134654 0.594512<br>C -3.122013 0.784756 0.366744<br>H -4.158312 0.755019 0.688092<br>C -2.451926 2.003879 0.418722<br>H -2.984072 2.873002 0.791547   |
| b5 | C 1.184926 -0.680743 -0.000022<br>C 1.010599 0.799045 0.000216<br>C -0.385063 1.029163 -0.000328<br>C -1.051529 -0.190952 -0.000340<br>C -0.086691 -1.257335 -0.000007<br>C 1.816055 1.922466 0.000756<br>C -1.039856 2.256611 -0.000283<br>C -0.179803 3.389325 0.000132<br>C 1.194827 3.205067 0.000565<br>H 2.899526 1.870952 0.001235<br>C -0.622914 -2.614596 0.000162<br>C 0.110724 -3.733916 0.000024<br>H -0.068763 -4.798529 0.000053<br>C 2.425576 -1.413265 -0.000035<br>C 3.640578 -0.890947 -0.000301<br>O 4.717619 -0.459482 -0.000547<br>H 2.396274 -2.499694 0.000160<br>H 1.837056 4.078854 0.000888<br>H -0.588169 4.394455 0.000134<br>C -2.423650 -0.280320 -0.000167<br>C -2.107262 -2.705613 0.000465<br>H -2.524146 -3.706252 0.000613<br>C -2.474428 2.184213 -0.000461<br>H -3.055146 3.100608 -0.000681<br>C -2.945897 -1.637585 0.000272<br>H -4.018560 -1.803688 0.000897<br>C -3.132991 0.966619 -0.000386<br>H -4.218225 0.955725 -0.000491 |

|    |           |           |           |           |           |
|----|-----------|-----------|-----------|-----------|-----------|
| b6 | C         | -4.441370 | -0.560928 | -0.000249 |           |
|    | C         | -3.164423 | -0.890354 | 0.000337  |           |
|    | C         | -2.048049 | 0.050243  | 0.000151  |           |
|    | C         | -0.728571 | -0.393546 | 0.000144  |           |
|    | C         | -0.054583 | -1.734925 | 0.000150  |           |
|    | C         | -0.621576 | -2.924198 | 0.000221  |           |
|    | H         | -2.960343 | -1.956921 | 0.000669  |           |
|    | C         | 0.289555  | 0.573643  | 0.000157  |           |
|    | C         | 1.555008  | -0.039501 | 0.000040  |           |
|    | C         | 2.745991  | 0.686822  | -0.000059 |           |
|    | C         | 3.923952  | -0.098732 | -0.000168 |           |
|    | C         | 3.830719  | -1.486261 | -0.000206 |           |
|    | C         | 2.595481  | -2.182030 | -0.000130 |           |
|    | C         | 1.430844  | -1.438141 | 0.000014  |           |
|    | H         | 4.900625  | 0.373544  | -0.000242 |           |
|    | H         | 4.745838  | -2.068291 | -0.000303 |           |
|    | H         | 2.591601  | -3.266227 | -0.000161 |           |
|    | H         | -0.336019 | -3.964334 | 0.000232  |           |
|    | O         | -5.569533 | -0.289265 | -0.000547 |           |
|    | C         | 0.131705  | 1.957155  | 0.000103  |           |
|    | C         | -2.247228 | 1.467752  | 0.000161  |           |
|    | H         | -3.267508 | 1.839068  | 0.000232  |           |
|    | C         | -1.217789 | 2.393150  | 0.000102  |           |
|    | H         | -1.456113 | 3.451602  | 0.000033  |           |
|    | C         | 1.354678  | 2.722396  | -0.000026 |           |
|    | H         | 1.293715  | 3.805999  | -0.000112 |           |
|    | C         | 2.592780  | 2.123170  | -0.000053 |           |
|    | H         | 3.481725  | 2.745372  | -0.000109 |           |
|    | b7        | C         | 1.652853  | -2.053194 | -0.370870 |
|    |           | C         | 2.779285  | -0.971639 | -0.437720 |
|    |           | C         | 2.012267  | 0.364028  | -0.498491 |
|    |           | C         | 0.724821  | -0.046877 | -0.593926 |
|    |           | C         | -0.383124 | 0.734191  | -0.434641 |
| C  |           | -1.469443 | -0.132109 | -0.232015 |           |
| C  |           | -2.699942 | 0.383352  | 0.158155  |           |
| C  |           | -3.685373 | -0.600986 | 0.424710  |           |
| C  |           | -3.351104 | -1.949604 | 0.334069  |           |
| C  |           | -2.049517 | -2.426159 | 0.017202  |           |
| C  |           | -1.058675 | -1.503246 | -0.267574 |           |
| C  |           | 0.437329  | -1.461152 | -0.468986 |           |
| C  |           | 3.786284  | -1.112396 | 0.713158  |           |
| H  |           | 1.901025  | -3.094314 | -0.211529 |           |
| H  |           | 3.402296  | -1.137376 | -1.329862 |           |
| H  |           | -4.690284 | -0.319385 | 0.721433  |           |
| H  |           | -4.118641 | -2.684398 | 0.550918  |           |
| H  |           | -1.858546 | -3.493171 | 0.031509  |           |
| O  |           | 4.383620  | -0.253384 | 1.254666  |           |
| C  |           | -0.315613 | 2.090292  | -0.166807 |           |
| C  |           | 2.157502  | 1.765635  | -0.292020 |           |
| H  |           | 3.137415  | 2.217449  | -0.190435 |           |
| C  |           | 1.026778  | 2.596878  | -0.147739 |           |
| H  | 1.200609  | 3.650763  | 0.042675  |           |           |
| C  | -2.726947 | 1.830902  | 0.313533  |           |           |
| H  | -3.665849 | 2.297093  | 0.595223  |           |           |
| C  | -1.613411 | 2.640060  | 0.179961  |           |           |
| H  | -1.720810 | 3.702550  | 0.372759  |           |           |
| b8 | C         | 3.860645  | -0.469105 | 0.000324  |           |
|    | C         | 1.690816  | 3.233050  | -0.000678 |           |
|    | C         | 0.496874  | 2.540170  | -0.000130 |           |
|    | C         | -0.775341 | 3.259563  | 0.000291  |           |
|    | C         | -2.005409 | 2.661229  | 0.000359  |           |
|    | C         | -2.111776 | 1.227504  | 0.000169  |           |
|    | C         | -3.282428 | 0.399204  | 0.000306  |           |
|    | C         | -3.206117 | -0.981570 | 0.000224  |           |
|    | C         | -1.941667 | -1.670428 | 0.000039  |           |
|    | C         | -1.656262 | -3.062093 | -0.000061 |           |
|    | C         | -0.337158 | -3.496929 | -0.000245 |           |
|    | C         | 0.774907  | -2.611465 | -0.000318 |           |
|    | C         | 0.524465  | -1.254408 | -0.000201 |           |
|    | C         | 1.356178  | -0.002077 | -0.000341 |           |
|    | C         | 2.703278  | 0.079596  | -0.000460 |           |
|    | C         | 0.398320  | 1.111832  | -0.000314 |           |
|    | C         | -0.895984 | 0.555141  | -0.000114 |           |
|    | C         | -0.819440 | -0.847471 | -0.000055 |           |
|    | H         | 1.699659  | 4.316553  | -0.000738 |           |
|    | H         | -0.718084 | 4.342977  | 0.000505  |           |

|     |                                                                                                                                                                                                                                                                                                                                                                                                                                                                                                                                                                                                                                                                                                                                                                                                                                                                                                                                                                     |
|-----|---------------------------------------------------------------------------------------------------------------------------------------------------------------------------------------------------------------------------------------------------------------------------------------------------------------------------------------------------------------------------------------------------------------------------------------------------------------------------------------------------------------------------------------------------------------------------------------------------------------------------------------------------------------------------------------------------------------------------------------------------------------------------------------------------------------------------------------------------------------------------------------------------------------------------------------------------------------------|
|     | H -2.901298 3.273190 0.000650<br>H -4.259710 0.870688 0.000470<br>H -4.124259 -1.559575 0.000301<br>H -2.461090 -3.789466 -0.000006<br>H -0.142295 -4.563506 -0.000343<br>H 1.783406 -3.009921 -0.000448<br>H 2.637474 2.709757 -0.001235<br>O 4.980347 -0.827644 0.001009                                                                                                                                                                                                                                                                                                                                                                                                                                                                                                                                                                                                                                                                                          |
| b9  | C 4.497538 -0.479429 0.000002<br>C 3.224703 -0.393036 -0.000018<br>C 2.054197 0.355819 -0.000018<br>C 0.762281 -0.231027 -0.000015<br>C 0.225688 -1.621282 -0.000002<br>C 0.929561 -2.763196 0.000012<br>H 2.011977 -2.748857 0.000006<br>C -0.340735 0.633144 -0.000009<br>C -1.540223 -0.103310 -0.000008<br>C -2.797668 0.499446 -0.000002<br>C -3.892633 -0.399200 0.000003<br>C -3.656254 -1.769119 0.000003<br>C -2.355226 -2.334137 0.000001<br>C -1.266908 -1.479876 -0.000004<br>H -4.911921 -0.028354 0.000006<br>H -4.506261 -2.442385 0.000006<br>H -2.244625 -3.412909 0.000005<br>H 0.432724 -3.726967 0.000026<br>O 5.655481 -0.708293 0.000016<br>C -0.323189 2.029419 0.000000<br>C 2.092712 1.810069 0.000000<br>H 3.076971 2.263179 0.000006<br>C 0.978871 2.614860 0.000006<br>H 1.094670 3.693533 0.000015<br>C -1.608820 2.665004 0.000008<br>H -1.659341 3.748772 0.000016<br>C -2.785242 1.940213 0.000005<br>H -3.729956 2.474149 0.000011 |
| b10 | C -3.564949 -0.997611 0.139190<br>C -2.750642 1.420950 0.087958<br>C -1.320245 1.940233 -0.101967<br>C -0.552800 3.105162 0.165015<br>C 0.858531 3.067236 0.159701<br>C 1.594805 1.855861 -0.065260<br>C 2.973866 1.472844 0.163374<br>C 3.359741 0.144901 0.164879<br>C 2.432969 -0.960827 -0.016432<br>C 2.609303 -2.356165 0.183154<br>C 1.499144 -3.199699 0.137934<br>C 0.168312 -2.753954 -0.061122<br>C -0.058081 -1.396032 -0.278642<br>C -1.178760 -0.445761 -0.343664<br>C -2.563794 -0.147223 -0.038391<br>C -0.580941 0.841797 -0.429480<br>C 0.796566 0.776047 -0.400225<br>C 1.131526 -0.579177 -0.314014<br>H -3.162267 1.684530 1.066549<br>H -1.032321 4.042428 0.427184<br>H 1.388839 3.980966 0.407250<br>H 3.720177 2.230469 0.379869<br>H 4.400208 -0.086064 0.371320<br>H 3.587626 -2.770338 0.402329<br>H 1.655188 -4.259964 0.305374<br>H -0.642067 -3.472411 -0.006672<br>H -3.443423 1.791836 -0.673836<br>O -4.449908 -1.734119 0.301073 |
| b11 | C 1.890893 -1.891311 0.097037<br>C 2.773808 -0.583381 -0.003992<br>C 1.919362 0.603067 0.199879<br>C 0.690867 0.061073 0.513063<br>C -0.503754 0.761228 0.458407<br>C -1.512585 -0.194818 0.312640<br>C -2.798792 0.189794 -0.037819<br>C -3.685955 -0.889406 -0.310272<br>C -3.201425 -2.195542 -0.283317<br>C -1.846265 -2.537121 -0.034266<br>C -0.938844 -1.520204 0.257578<br>C 0.510614 -1.323602 0.392020                                                                                                                                                                                                                                                                                                                                                                                                                                                                                                                                                    |

|     |                                 |
|-----|---------------------------------|
|     | C 4.069038 -0.597171 -0.247109  |
|     | H 2.263276 -2.554976 0.885163   |
|     | H 1.921745 -2.454227 -0.842166  |
|     | H -4.722527 -0.707427 -0.573142 |
|     | H -3.890857 -3.002209 -0.508202 |
|     | H -1.541972 -3.575118 -0.112944 |
|     | O 5.210680 -0.609099 -0.466485  |
|     | C -0.584980 2.102443 0.137281   |
|     | C 1.907571 2.009993 -0.029876   |
|     | H 2.821700 2.545758 -0.260794   |
|     | C 0.699957 2.732008 -0.039019   |
|     | H 0.750458 3.792329 -0.264318   |
|     | C -2.980084 1.620522 -0.203239  |
|     | H -3.970714 1.990213 -0.448800  |
|     | C -1.937839 2.529935 -0.143323  |
|     | H -2.146069 3.573405 -0.356950  |
| CO  | C 0.000000 0.000000 -0.643976   |
|     | O 0.000000 0.000000 0.482982    |
| b4  | C 1.685666 -2.530321 -0.170025  |
|     | C 2.852682 -1.731217 -0.284868  |
|     | C 2.535758 -0.325475 0.055551   |
|     | C 1.227168 -0.418893 0.452657   |
|     | C 0.319821 0.599755 0.448465    |
|     | C -0.954835 0.007122 0.329148   |
|     | C -2.062167 0.792112 0.038436   |
|     | C -3.253870 0.060899 -0.203580  |
|     | C -3.218781 -1.332853 -0.211419 |
|     | C -2.036574 -2.094350 -0.031348 |
|     | C -0.846805 -1.426859 0.231737  |
|     | C 0.607910 -1.714710 0.264387   |
|     | H 1.651434 -3.579222 -0.430640  |
|     | H 3.807423 -2.106115 -0.632514  |
|     | H -4.187021 0.571857 -0.416597  |
|     | H -4.140726 -1.867838 -0.411372 |
|     | H -2.078807 -3.172629 -0.135208 |
|     | C 0.659720 1.908126 0.131484    |
|     | C 2.966138 1.013198 -0.184549   |
|     | H 3.984887 1.228776 -0.489762   |
|     | C 2.059374 2.090851 -0.119436   |
|     | H 2.436315 3.080878 -0.354655   |
|     | C -0.505809 2.745755 -0.077624  |
|     | H -0.384258 3.807124 -0.269301  |
|     | C -1.781381 2.215436 -0.097504  |
|     | H -2.613344 2.885717 -0.289029  |
| b12 | C -3.013773 -1.765495 0.177024  |
|     | C -2.552658 -0.306625 -0.036657 |
|     | C -2.969888 1.047238 0.105851   |
|     | C -2.038818 2.108566 0.067116   |
|     | C -0.630219 1.894216 -0.085051  |
|     | C 0.547984 2.732868 0.041523    |
|     | C 1.821332 2.193519 0.054728    |
|     | C 2.098215 0.766126 -0.025323   |
|     | C 3.305435 0.039059 0.122800    |
|     | C 3.271675 -1.353972 0.129626   |
|     | C 2.080960 -2.122187 0.024515   |
|     | C 0.878365 -1.455339 -0.135731  |
|     | C -0.594513 -1.760498 -0.142391 |
|     | C -1.667746 -2.527467 0.110704  |
|     | C -1.221446 -0.441423 -0.264165 |
|     | C -0.297026 0.563520 -0.275656  |
|     | C 0.970672 -0.029138 -0.199031  |
|     | H -3.491109 -1.921262 1.149976  |
|     | H -4.010569 1.297503 0.283854   |
|     | H -2.417872 3.115419 0.208450   |
|     | H 0.441114 3.806881 0.155585    |
|     | H 2.661455 2.871100 0.170621    |
|     | H 4.253744 0.550089 0.252376    |
|     | H 4.207184 -1.888953 0.251634   |
|     | H 2.136681 -3.202334 0.093545   |
|     | H -3.711941 -2.126243 -0.585335 |
| b13 | C -2.911661 -1.626458 0.343628  |
|     | C -2.590397 -0.346181 0.006870  |
|     | C -3.013261 1.048572 0.152333   |
|     | C -2.107084 2.080824 0.085688   |
|     | C -0.660926 1.878948 -0.119067  |
|     | C 0.474127 2.737194 0.089040    |

|        |                                 |
|--------|---------------------------------|
|        | C 1.768771 2.228164 0.093142    |
|        | C 2.060060 0.822510 -0.058754   |
|        | C 3.268425 0.101605 0.171608    |
|        | C 3.231356 -1.284085 0.194427   |
|        | C 2.040179 -2.058898 0.033262   |
|        | C 0.846159 -1.410904 -0.219066  |
|        | C -0.619289 -1.706505 -0.287003 |
|        | C -1.750681 -2.621614 0.181819  |
|        | C -1.222061 -0.488236 -0.399635 |
|        | C -0.316361 0.585253 -0.404977  |
|        | C 0.952492 0.024225 -0.318186   |
|        | H -1.533090 -3.100769 1.143141  |
|        | H -4.050896 1.276498 0.367724   |
|        | H -2.472617 3.089053 0.253021   |
|        | H 0.331006 3.794238 0.288308    |
|        | H 2.589392 2.912783 0.282787    |
|        | H 4.200739 0.619848 0.368531    |
|        | H 4.153814 -1.820395 0.389847   |
|        | H 2.099300 -3.135467 0.153269   |
|        | H -2.016740 -3.422260 -0.517414 |
|        | C -3.390797 -0.908444 -0.251467 |
|        | C -2.987140 0.197607 0.624463   |
|        | C -1.874336 1.101879 0.213420   |
|        | C -1.575605 2.485781 0.340689   |
|        | C -0.273353 2.974079 0.125083   |
|        | C 0.827440 2.108912 -0.188296   |
|        | C 2.263937 2.297126 -0.139573   |
|        | C 3.130672 1.222445 -0.150455   |
|        | C 2.678691 -0.158999 -0.161951  |
|        | C 3.399029 -1.362677 0.074092   |
|        | C 2.705289 -2.561684 0.223801   |
|        | C 1.291049 -2.665585 0.196027   |
|        | C 0.542768 -1.517452 -0.048806  |
|        | C -0.858077 -1.076777 0.005421  |
|        | C -2.197024 -1.445622 0.460889  |
|        | C -0.831086 0.324572 -0.223432  |
|        | C 0.459709 0.789972 -0.390241   |
|        | C 1.309123 -0.323208 -0.297814  |
|        | H -3.663379 0.445893 1.438153   |
|        | H -2.339013 3.188283 0.656367   |
|        | H -0.097720 4.033201 0.282619   |
|        | H 2.675202 3.297431 -0.050729   |
|        | H 4.196451 1.416926 -0.085811   |
|        | H 4.479324 -1.354140 0.172445   |
|        | H 3.275074 -3.464125 0.416128   |
|        | H 0.825602 -3.623126 0.400918   |
|        | H -2.391299 -2.274531 1.135999  |
|        | O -4.335247 -1.319672 -0.854650 |
| bTS1-2 | C 3.398065 -1.449546 -0.007902  |
|        | C 3.182935 1.126132 0.074746    |
|        | C 1.879722 1.436326 0.029981    |
|        | C 0.879145 0.399733 -0.040459   |
|        | C 0.938646 -0.993258 0.011417   |
|        | C 2.107000 -1.803742 0.111391   |
|        | C -0.489728 0.797361 -0.075810  |
|        | C -1.291974 -0.339335 -0.062049 |
|        | C -2.680191 -0.283098 -0.040572 |
|        | C -3.321146 -1.552942 0.004901  |
|        | C -2.552104 -2.707255 0.041566  |
|        | C -1.126001 -2.705037 0.043920  |
|        | C -0.470230 -1.490817 -0.004682 |
|        | H -4.403347 -1.627997 0.018102  |
|        | H -3.057485 -3.666012 0.078672  |
|        | H -0.599925 -3.653058 0.088516  |
|        | H 2.008578 -2.862640 0.342224   |
|        | O 4.550948 -1.482542 -0.165594  |
|        | C -0.995268 2.074877 -0.034295  |
|        | C 1.344148 2.817506 0.080552    |
|        | H 2.069253 3.621032 0.138691    |
|        | C 0.016243 3.118794 0.038100    |
|        | H -0.287942 4.160596 0.063829   |
|        | C -2.428320 2.169441 -0.029296  |
|        | H -2.894967 3.149083 -0.008799  |
|        | C -3.236224 1.044252 -0.038381  |
|        | H -4.313848 1.169438 -0.029745  |
|        | H 4.143794 1.613551 0.014497    |
| bTS1-5 |                                 |

|        |          |           |           |           |           |
|--------|----------|-----------|-----------|-----------|-----------|
| bTS1-6 | C        | -3.743969 | -0.755201 | 0.030657  |           |
|        | C        | -3.321778 | 0.516246  | -0.092354 |           |
|        | C        | -1.976193 | 1.035148  | -0.044831 |           |
|        | C        | -0.866794 | 0.208453  | 0.003570  |           |
|        | C        | -0.734820 | -1.261903 | -0.029411 |           |
|        | C        | -1.796208 | -2.039740 | -0.078937 |           |
|        | C        | 0.412809  | 0.758363  | 0.037953  |           |
|        | C        | 1.373400  | -0.266622 | 0.025578  |           |
|        | C        | 2.740604  | -0.001430 | 0.028281  |           |
|        | C        | 3.565531  | -1.153477 | 0.004570  |           |
|        | C        | 2.987996  | -2.418428 | -0.026683 |           |
|        | C        | 1.585393  | -2.637918 | -0.042358 |           |
|        | C        | 0.756974  | -1.533094 | -0.016886 |           |
|        | H        | 4.646331  | -1.059021 | 0.007020  |           |
|        | H        | 3.639543  | -3.285077 | -0.046703 |           |
|        | H        | 1.202920  | -3.651594 | -0.079223 |           |
|        | H        | -2.114015 | -3.068678 | -0.065379 |           |
|        | O        | -4.512900 | -1.631662 | 0.174162  |           |
|        | C        | 0.728262  | 2.111041  | 0.029775  |           |
|        | C        | -1.692279 | 2.441510  | -0.054324 |           |
|        | H        | -2.531189 | 3.128852  | -0.090562 |           |
|        | C        | -0.408398 | 2.967417  | -0.014334 |           |
|        | H        | -0.282707 | 4.045100  | -0.025101 |           |
|        | C        | 2.142885  | 2.400107  | 0.041452  |           |
|        | H        | 2.470542  | 3.434782  | 0.043850  |           |
|        | C        | 3.093001  | 1.402059  | 0.045598  |           |
|        | H        | 4.142684  | 1.676651  | 0.056588  |           |
|        | H        | -4.149409 | 1.197102  | -0.277680 |           |
|        | bTS2-3   | C         | 2.669164  | -1.323328 | 0.793335  |
|        |          | C         | 3.016781  | 0.288863  | -0.334004 |
|        |          | C         | 1.978599  | 1.236279  | -0.394526 |
|        |          | C         | 1.689920  | 2.597490  | 0.020301  |
| C      |          | 0.386334  | 3.030752  | 0.206141  |           |
| C      |          | -0.775767 | 2.159294  | 0.038249  |           |
| C      |          | -2.143225 | 2.267396  | 0.478470  |           |
| C      |          | -2.987934 | 1.164949  | 0.473097  |           |
| C      |          | -2.556762 | -0.158429 | 0.081567  |           |
| C      |          | -3.188894 | -1.422337 | 0.256906  |           |
| C      |          | -2.463898 | -2.581732 | 0.013907  |           |
| C      |          | -1.090721 | -2.600493 | -0.370237 |           |
| C      |          | -0.436714 | -1.397257 | -0.575908 |           |
| C      |          | 0.943368  | -0.877800 | -0.793967 |           |
| C      |          | 2.429695  | -1.149171 | -0.631949 |           |
| C      |          | 0.835400  | 0.494915  | -0.722144 |           |
| C      |          | -0.471127 | 0.923153  | -0.478874 |           |
| C      |          | -1.256849 | -0.224482 | -0.405608 |           |
| H      |          | 4.080720  | 0.444072  | -0.219961 |           |
| H      |          | 2.498684  | 3.284898  | 0.241530  |           |
| H      |          | 0.234581  | 4.045580  | 0.559783  |           |
| H      |          | -2.519960 | 3.208559  | 0.865405  |           |
| H      |          | -4.000148 | 1.292317  | 0.843748  |           |
| H      |          | -4.210936 | -1.491595 | 0.613469  |           |
| H      |          | -2.953720 | -3.536812 | 0.169563  |           |
| H      |          | -0.581746 | -3.555012 | -0.447395 |           |
| H      | 2.954306 | -1.803711 | -1.339454 |           |           |
| O      | 3.129250 | -2.057084 | 1.598097  |           |           |
| bTS2-7 | C        | 3.034733  | -1.212357 | 0.800831  |           |
|        | C        | 2.975179  | -0.597677 | -0.532218 |           |
|        | C        | 2.099808  | 0.658024  | -0.563604 |           |
|        | C        | 2.132118  | 2.046533  | -0.256106 |           |
|        | C        | 0.938786  | 2.772860  | -0.050881 |           |
|        | C        | -0.356093 | 2.157767  | -0.093873 |           |
|        | C        | -1.685894 | 2.578314  | 0.299698  |           |
|        | C        | -2.729263 | 1.673559  | 0.391728  |           |
|        | C        | -2.589595 | 0.247095  | 0.142695  |           |
|        | C        | -3.486315 | -0.829019 | 0.364597  |           |
|        | C        | -3.038972 | -2.138981 | 0.190035  |           |
|        | C        | -1.712949 | -2.487176 | -0.173933 |           |
|        | C        | -0.798103 | -1.469004 | -0.419118 |           |
|        | C        | 0.658404  | -1.294479 | -0.660572 |           |
|        | C        | 1.961141  | -1.820150 | -0.654415 |           |
|        | C        | 0.846555  | 0.131781  | -0.670271 |           |
|        | C        | -0.319570 | 0.819587  | -0.449704 |           |
|        | C        | -1.327479 | -0.137906 | -0.294555 |           |
|        | H        | 3.890179  | -0.666063 | -1.121405 |           |
|        | H        | 3.073094  | 2.572919  | -0.141981 |           |

|        |                                 |
|--------|---------------------------------|
|        | H 1.027652 3.823776 0.203579    |
|        | H -1.874135 3.613727 0.564434   |
|        | H -3.696922 2.043363 0.716560   |
|        | H -4.504777 -0.650945 0.692937  |
|        | H -3.738347 -2.946883 0.376325  |
|        | H -1.436530 -3.534316 -0.224050 |
|        | H 2.316108 -2.808007 -0.909625  |
|        | O 3.166092 -1.005024 1.952654   |
| bTS5-3 | C 1.127364 -0.595993 -0.507364  |
|        | C -0.120443 -1.405983 -0.395851 |
|        | C -1.176271 -0.445212 -0.245829 |
|        | C -0.646292 0.835104 -0.251557  |
|        | C 0.747443 0.710534 -0.414146   |
|        | C -0.521879 -2.725372 -0.311063 |
|        | C -2.512294 -0.668864 0.060482  |
|        | C -2.878543 -2.045536 0.122886  |
|        | C -1.902442 -3.011921 -0.070030 |
|        | H 0.176856 -3.550831 -0.395186  |
|        | C 1.644168 1.810611 -0.238990   |
|        | C 2.926548 1.391339 -0.312156   |
|        | H 3.878422 1.899280 -0.207137   |
|        | C 2.617098 -0.707848 -0.556592  |
|        | C 3.229700 -1.558711 0.345205   |
|        | O 3.887067 -1.885264 1.250130   |
|        | H 3.100143 -0.749979 -1.535554  |
|        | H -2.192386 -4.055382 -0.009482 |
|        | H -3.898227 -2.345222 0.339473  |
|        | C -1.299436 1.986287 0.098785   |
|        | C 0.945594 3.076996 0.066789    |
|        | H 1.536911 3.977873 0.187745    |
|        | C -3.269515 0.524250 0.344131   |
|        | H -4.325420 0.431608 0.577630   |
|        | C -0.415623 3.157212 0.213222   |
|        | H -0.852315 4.122393 0.450211   |
|        | C -2.695214 1.792135 0.376757   |
|        | H -3.320291 2.638208 0.643188   |
| bTS6-7 | C 4.100838 -0.503682 0.335043   |
|        | C 3.029314 -0.513741 -0.534090  |
|        | C 1.979458 0.564627 -0.378001   |
|        | C 1.994006 1.983350 -0.267149   |
|        | C 0.811565 2.725965 -0.105844   |
|        | C -0.468696 2.095814 -0.039537  |
|        | C -1.818153 2.579186 0.176158   |
|        | C -2.892016 1.714388 0.264724   |
|        | C -2.771087 0.269492 0.163421   |
|        | C -3.740390 -0.758353 0.276646  |
|        | C -3.343100 -2.089289 0.176863  |
|        | C -1.998711 -2.503758 -0.026891 |
|        | C -1.021464 -1.532407 -0.147850 |
|        | C 0.483795 -1.443316 -0.322124  |
|        | C 1.621360 -2.131446 -0.419904  |
|        | C 0.745313 -0.005425 -0.325561  |
|        | C -0.411375 0.717403 -0.168731  |
|        | C -1.476693 -0.187412 -0.059559 |
|        | H 3.356193 -0.725490 -1.553612  |
|        | H 2.937561 2.517379 -0.300179   |
|        | H 0.893368 3.804181 -0.018405   |
|        | H -1.999911 3.643947 0.280290   |
|        | H -3.877991 2.136655 0.431765   |
|        | H -4.785925 -0.523822 0.446797  |
|        | H -4.100895 -2.859711 0.269805  |
|        | H -1.770562 -3.562624 -0.073859 |
|        | H 1.874914 -3.184222 -0.438527  |
|        | O 4.816182 -0.891834 1.171280   |
| bTS5-8 | C 3.771226 -0.383663 -0.026613  |
|        | C 1.803107 3.057250 -0.025971   |
|        | C 0.514233 2.535341 0.013268    |
|        | C -0.752677 3.268081 -0.029287  |
|        | C -1.991439 2.673887 -0.033365  |
|        | C -2.118711 1.235006 0.006343   |
|        | C -3.285430 0.394067 -0.018140  |
|        | C -3.191493 -0.986971 -0.013181 |
|        | C -1.922803 -1.672766 0.010545  |
|        | C -1.620244 -3.061626 -0.018141 |
|        | C -0.293937 -3.475227 -0.020533 |
|        | C 0.811029 -2.578315 0.000036   |

|         |                                                                                                                                                                                                                                                                                                                                                                                                                                                                                                                                                                                                                                                                                                                                                                                                                                                                                                                                                                            |
|---------|----------------------------------------------------------------------------------------------------------------------------------------------------------------------------------------------------------------------------------------------------------------------------------------------------------------------------------------------------------------------------------------------------------------------------------------------------------------------------------------------------------------------------------------------------------------------------------------------------------------------------------------------------------------------------------------------------------------------------------------------------------------------------------------------------------------------------------------------------------------------------------------------------------------------------------------------------------------------------|
|         | C 0.554695 -1.219829 0.033340<br>C 1.326504 0.051657 0.045573<br>C 2.692685 0.373904 0.000108<br>C 0.371951 1.116414 0.056483<br>C -0.918019 0.553291 0.055715<br>C -0.811286 -0.840500 0.046984<br>H 1.885899 4.144778 0.094063<br>H -0.689911 4.351090 -0.061062<br>H -2.882413 3.292720 -0.063460<br>H -4.269120 0.850840 -0.048816<br>H -4.105156 -1.571865 -0.038449<br>H -2.412831 -3.801791 -0.043556<br>H -0.083671 -4.538557 -0.045483<br>H 1.818184 -2.980602 -0.015825<br>H 2.791790 1.562553 -0.049939<br>O 4.788861 -0.943645 -0.028306                                                                                                                                                                                                                                                                                                                                                                                                                       |
| bTS6-9  | C -4.376856 -0.526758 -0.000137<br>C -3.077879 -0.511834 -0.000092<br>C -1.995878 0.442523 -0.000053<br>C -0.735199 -0.114699 -0.000018<br>C -0.340998 -1.537805 -0.000017<br>C -1.309245 -2.443988 -0.000051<br>H -2.515842 -1.683768 -0.000082<br>C 0.400877 0.673505 0.000025<br>C 1.537494 -0.151306 0.000053<br>C 2.822834 0.380633 0.000087<br>C 3.857954 -0.588012 0.000099<br>C 3.537659 -1.942056 0.000074<br>C 2.205473 -2.435154 0.000037<br>C 1.172221 -1.517534 0.000028<br>H 4.899932 -0.285705 0.000125<br>H 4.346645 -2.664221 0.000081<br>H 2.033020 -3.505403 0.000017<br>H -1.404408 -3.519800 -0.000056<br>O -5.540227 -0.635696 -0.000177<br>C 0.425027 2.060662 0.000034<br>C -2.027766 1.875512 -0.000043<br>H -2.989219 2.376989 -0.000069<br>C -0.871584 2.653988 -0.000002<br>H -0.977614 3.733893 0.000001<br>C 1.756805 2.623714 0.000075<br>H 1.878771 3.702088 0.000086<br>C 2.884397 1.829297 0.000100<br>H 3.858500 2.307388 0.000129      |
| bTS8-10 | C 3.586048 -1.154483 -0.205926<br>C 2.723529 1.843630 0.107341<br>C 1.296362 2.023786 0.138893<br>C 0.457414 3.131050 -0.230779<br>C -0.931362 3.048483 -0.236051<br>C -1.617725 1.813600 0.034160<br>C -2.992015 1.419760 -0.178664<br>C -3.375765 0.093535 -0.153107<br>C -2.430139 -0.987348 0.033816<br>C -2.594774 -2.386940 -0.145602<br>C -1.482626 -3.220880 -0.111895<br>C -0.152716 -2.749342 0.058857<br>C 0.044317 -1.395678 0.267256<br>C 1.191227 -0.439280 0.303831<br>C 2.535901 -0.419358 -0.007132<br>C 0.607737 0.858099 0.447127<br>C -0.781554 0.770633 0.388472<br>C -1.128870 -0.587285 0.312864<br>H 3.335030 2.372458 -0.619175<br>H 0.918635 4.079305 -0.485103<br>H -1.500379 3.931873 -0.506886<br>H -3.737437 2.175587 -0.403595<br>H -4.416126 -0.150860 -0.341889<br>H -3.574836 -2.809256 -0.340821<br>H -1.629059 -4.284050 -0.266936<br>H 0.673395 -3.448160 -0.009731<br>H 3.230483 1.592958 1.029463<br>O 4.621295 -1.678969 -0.374512 |
| bTS9-11 | C 1.696198 -2.093817 0.420775<br>C 2.917589 -0.314510 -0.093890<br>C 1.920229 0.638373 0.212081<br>C 0.710782 0.051335 0.579890                                                                                                                                                                                                                                                                                                                                                                                                                                                                                                                                                                                                                                                                                                                                                                                                                                            |



|        |   |           |           |           |
|--------|---|-----------|-----------|-----------|
|        | C | -0.494761 | 0.747618  | 0.470350  |
|        | C | -1.510356 | -0.198010 | 0.278039  |
|        | C | -2.795998 | 0.184474  | -0.086139 |
|        | C | -3.674857 | -0.894448 | -0.380037 |
|        | C | -3.195698 | -2.199600 | -0.352194 |
|        | C | -1.843218 | -2.535816 | -0.075019 |
|        | C | -0.954743 | -1.513875 | 0.226400  |
|        | C | 0.498471  | -1.350826 | 0.476675  |
|        | C | 4.166326  | -0.479593 | -0.380731 |
|        | H | 2.371697  | -2.038287 | 1.266286  |
|        | H | 1.778250  | -3.010426 | -0.158299 |
|        | H | -4.707042 | -0.708656 | -0.657409 |
|        | H | -3.879358 | -3.005720 | -0.594481 |
|        | H | -1.530175 | -3.571791 | -0.142858 |
|        | O | 5.269968  | -0.773097 | -0.652482 |
|        | C | -0.606990 | 2.089165  | 0.159320  |
|        | C | 1.862877  | 2.071436  | 0.021871  |
|        | H | 2.777708  | 2.612508  | -0.190006 |
|        | C | 0.661606  | 2.763091  | 0.012788  |
|        | H | 0.682935  | 3.828388  | -0.193737 |
|        | C | -2.992893 | 1.609393  | -0.231838 |
|        | H | -3.981800 | 1.977358  | -0.485177 |
|        | C | -1.951329 | 2.515336  | -0.139232 |
|        | H | -2.151368 | 3.563037  | -0.339114 |
| bTS3-4 | C | 2.515006  | -0.924263 | -0.513875 |
|        | C | 3.084907  | 0.480279  | -0.291631 |
|        | C | 2.038704  | 1.389905  | -0.286626 |
|        | C | 0.909511  | 0.611624  | -0.618631 |
|        | C | -0.409882 | 0.995013  | -0.424708 |
|        | C | -1.163013 | -0.177230 | -0.425933 |
|        | C | -2.482721 | -0.159779 | 0.008620  |
|        | C | -3.083591 | -1.446968 | 0.119787  |
|        | C | -2.313684 | -2.574275 | -0.127531 |
|        | C | -0.924984 | -2.542715 | -0.464369 |
|        | C | -0.301513 | -1.318707 | -0.615872 |
|        | C | 1.077468  | -0.754860 | -0.755667 |
|        | C | 2.699356  | -1.792366 | 1.057858  |
|        | H | 3.119809  | -1.633799 | -1.078652 |
|        | H | 4.130774  | 0.647461  | -0.072417 |
|        | H | -4.116932 | -1.557973 | 0.430406  |
|        | H | -2.778977 | -3.548005 | -0.018253 |
|        | H | -0.385173 | -3.478848 | -0.549616 |
|        | O | 2.141245  | -2.775961 | 1.294457  |
|        | C | -0.770270 | 2.216929  | 0.089240  |
|        | C | 1.684409  | 2.747995  | 0.122121  |
|        | H | 2.460225  | 3.471362  | 0.347813  |
|        | C | 0.365767  | 3.127165  | 0.290092  |
|        | H | 0.169578  | 4.135515  | 0.640537  |
|        | C | -2.964400 | 1.141479  | 0.415104  |
|        | H | -3.993477 | 1.232336  | 0.748254  |
|        | C | -2.153979 | 2.272148  | 0.476826  |
|        | H | -2.578320 | 3.191401  | 0.867443  |
| bTS7-4 | C | 4.067624  | -0.787761 | 0.496716  |
|        | C | 2.786295  | -0.528472 | -0.883059 |
|        | C | 1.998581  | 0.671171  | -0.433112 |
|        | C | 1.943850  | 2.094109  | -0.511127 |
|        | C | 0.750769  | 2.788605  | -0.226955 |
|        | C | -0.471219 | 2.120082  | 0.121084  |
|        | C | -1.860373 | 2.532350  | 0.186666  |
|        | C | -2.884859 | 1.606378  | 0.259669  |
|        | C | -2.674744 | 0.165727  | 0.235785  |
|        | C | -3.595957 | -0.903307 | 0.095385  |
|        | C | -3.120487 | -2.200398 | -0.080935 |
|        | C | -1.742586 | -2.535147 | -0.171025 |
|        | C | -0.803569 | -1.528038 | -0.020929 |
|        | C | 0.669567  | -1.313903 | -0.221044 |
|        | C | 1.851094  | -1.705775 | -0.800255 |
|        | C | 0.849638  | 0.100197  | 0.025863  |
|        | C | -0.326555 | 0.749516  | 0.265043  |
|        | C | -1.341020 | -0.224041 | 0.243628  |
|        | H | 3.458744  | -0.468069 | -1.730982 |
|        | H | 2.800614  | 2.672965  | -0.839252 |
|        | H | 0.757068  | 3.867216  | -0.344538 |
|        | H | -2.118040 | 3.585605  | 0.141280  |
|        | H | -3.905924 | 1.974089  | 0.281460  |
|        | H | -4.665696 | -0.722159 | 0.095393  |

|          |                                 |
|----------|---------------------------------|
|          | H -3.843226 -3.000823 -0.195703 |
|          | H -1.459851 -3.560083 -0.382778 |
|          | H 2.126010 -2.679702 -1.183048  |
|          | O 3.784251 -1.034601 1.583722   |
| bTS10-12 | C 4.266649 1.506097 0.219592    |
|          | C 2.566580 -1.610140 -0.044987  |
|          | C 1.096591 -2.071487 -0.147824  |
|          | C 0.239800 -3.182856 0.095176   |
|          | C -1.162282 -3.027039 0.151826  |
|          | C -1.804644 -1.754520 0.002288  |
|          | C -3.153549 -1.263744 0.219225  |
|          | C -3.439667 0.089159 0.215304   |
|          | C -2.437192 1.128630 0.029189   |
|          | C -2.520148 2.538108 0.152306   |
|          | C -1.361516 3.305897 0.055117   |
|          | C -0.061390 2.764538 -0.134227  |
|          | C 0.066177 1.393528 -0.275250   |
|          | C 1.155833 0.358582 -0.331010   |
|          | C 2.415352 -0.070909 -0.146758  |
|          | C 0.428584 -0.911208 -0.370859  |
|          | C -0.922745 -0.728047 -0.291161 |
|          | C -1.157045 0.653080 -0.232811  |
|          | H 3.031181 -1.884818 0.907635   |
|          | H 0.644017 -4.172634 0.280138   |
|          | H -1.757712 -3.907980 0.368216  |
|          | H -3.960690 -1.961608 0.417695  |
|          | H -4.464180 0.394918 0.402959   |
|          | H -3.469480 3.027438 0.343540   |
|          | H -1.449064 4.381748 0.160466   |
|          | H 0.797056 3.425749 -0.140301   |
|          | H 3.210365 -1.999443 -0.840552  |
|          | O 5.265772 0.998827 0.388673    |
| bTS11-13 | C -1.887439 -1.757704 -0.223543 |
|          | C -2.640238 -0.420372 -0.095440 |
|          | C -1.854590 0.671201 -0.311983  |
|          | C -0.588185 0.069162 -0.606881  |
|          | C 0.630715 0.750481 -0.460790   |
|          | C 1.606704 -0.226655 -0.301866  |
|          | C 2.888654 0.117735 0.109095    |
|          | C 3.737113 -0.992416 0.393777   |
|          | C 3.216353 -2.274921 0.317306   |
|          | C 1.853501 -2.570753 0.000094   |
|          | C 0.995892 -1.533127 -0.310732  |
|          | C -0.465449 -1.286740 -0.524322 |
|          | C -5.037773 -0.066328 0.450776  |
|          | H -2.337689 -2.387659 -0.999056 |
|          | H -1.955674 -2.317340 0.716315  |
|          | H 4.765197 -0.845291 0.706726   |
|          | H 3.866921 -3.109714 0.555088   |
|          | H 1.519033 -3.601476 0.051050   |
|          | O -5.616713 -1.024873 0.621629  |
|          | C 0.731045 2.071460 -0.116028   |
|          | C -1.778750 2.119512 -0.107332  |
|          | H -2.689684 2.689453 0.033201   |
|          | C -0.567469 2.765116 -0.023561  |
|          | H -0.573464 3.830957 0.181677   |
|          | C 3.092178 1.529208 0.332745    |
|          | H 4.074866 1.871641 0.641172    |
|          | C 2.065137 2.463964 0.250467    |
|          | H 2.279793 3.495475 0.510102    |
| c        | C -2.864572 -1.878045 0.000005  |
|          | C -3.247453 -0.445532 0.000052  |
|          | C -2.123453 0.513984 -0.000015  |
|          | C -0.871871 -0.060187 -0.000099 |
|          | C -0.500086 -1.452302 -0.000092 |
|          | C -1.565296 -2.368476 -0.000049 |
|          | H -3.706578 -2.560840 0.000040  |
|          | C 0.274242 0.728824 -0.000115   |
|          | C 1.391406 -0.111744 -0.000095  |
|          | C 2.680477 0.398868 -0.000017   |
|          | C 3.700507 -0.592061 0.000063   |
|          | C 3.351304 -1.939352 0.000090   |
|          | C 2.010053 -2.409893 0.000049   |
|          | C 0.983356 -1.477127 -0.000053  |
|          | H 4.748565 -0.312023 0.000120   |
|          | H 4.146340 -2.676628 0.000153   |

|    |                                                                                                                                                                                                                                                                                                                                                                                                                                                                                                                                                                                                                                                                                                                                                                                                                                                                                                                                                                            |
|----|----------------------------------------------------------------------------------------------------------------------------------------------------------------------------------------------------------------------------------------------------------------------------------------------------------------------------------------------------------------------------------------------------------------------------------------------------------------------------------------------------------------------------------------------------------------------------------------------------------------------------------------------------------------------------------------------------------------------------------------------------------------------------------------------------------------------------------------------------------------------------------------------------------------------------------------------------------------------------|
|    | H 1.824179 -3.478109 0.000084<br>C -2.158100 1.942760 0.000039<br>H -3.125377 2.431695 0.000099<br>C -1.000158 2.715835 0.000029<br>H -1.093984 3.796683 0.000083<br>C 0.301859 2.109262 -0.000038<br>C 2.758392 1.846151 0.000010<br>H 3.737668 2.313751 0.000062<br>C 1.640306 2.658300 0.000005<br>H 1.778289 3.734474 0.000051<br>H -1.396266 -3.440317 -0.000029<br>O -4.434791 -0.110535 0.000090                                                                                                                                                                                                                                                                                                                                                                                                                                                                                                                                                                    |
| c3 | C -1.965140 -1.586153 0.465685<br>C -2.865607 -0.310963 0.559384<br>C -1.909047 0.850130 0.217524<br>C -0.758753 0.198881 -0.068361<br>C 0.473594 0.763359 -0.212925<br>C 1.409035 -0.280702 -0.181948<br>C 2.766839 0.012337 -0.148378<br>C 3.602735 -1.128069 -0.036739<br>C 3.027637 -2.392094 0.069396<br>C 1.625848 -2.630760 0.102282<br>C 0.768492 -1.550945 -0.016866<br>C -0.705512 -1.237544 0.100759<br>C -4.140864 -0.354271 -0.299730<br>H -2.369150 -2.561319 0.703023<br>H -3.250070 -0.208754 1.584259<br>H 4.683023 -1.030243 -0.013268<br>H 3.686472 -3.248759 0.159805<br>H 1.264818 -3.643779 0.238591<br>O -4.654895 -1.288740 -0.799924<br>C 0.699924 2.123266 -0.108288<br>C -1.765018 2.266477 0.278026<br>H -2.614176 2.908984 0.483683<br>C -0.503457 2.876455 0.106709<br>H -0.454837 3.957362 0.186778<br>C 3.075266 1.435847 -0.155029<br>H 4.119619 1.731802 -0.147357<br>C 2.117843 2.434422 -0.123445<br>H 2.450564 3.466591 -0.084471     |
| c5 | C 3.478802 0.178794 -0.000023<br>C 4.755232 -0.172164 -0.000014<br>C 0.884541 2.242902 -0.000007<br>C 0.494497 0.931930 -0.000005<br>C 1.080274 -0.434334 -0.000010<br>C 2.392460 -0.768300 -0.000018<br>H 3.282954 1.247086 -0.000004<br>C -0.917165 0.775867 0.000004<br>C -1.242770 -0.589591 0.000004<br>C -2.560872 -1.045702 0.000011<br>C -2.705612 -2.453145 0.000009<br>C -1.572019 -3.260893 0.000000<br>C -0.250793 -2.750883 -0.000007<br>C -0.074038 -1.375971 -0.000005<br>H -3.690693 -2.907390 0.000015<br>H -1.703406 -4.337560 -0.000001<br>H 0.583762 -3.443780 -0.000014<br>C 0.005801 3.327460 0.000000<br>H 0.388942 4.342254 -0.000001<br>C -1.375761 3.112068 0.000009<br>H -2.049766 3.962441 0.000015<br>C -1.877037 1.787616 0.000011<br>C -3.569760 -0.010909 0.000020<br>H -4.615740 -0.300157 0.000026<br>C -3.247410 1.325155 0.000020<br>H -4.045883 2.060069 0.000026<br>H 2.655521 -1.821667 -0.000021<br>O 5.875512 -0.465087 -0.000004 |
| CO | C 0.000000 0.000000 -0.643977<br>O 0.000000 0.000000 0.482983                                                                                                                                                                                                                                                                                                                                                                                                                                                                                                                                                                                                                                                                                                                                                                                                                                                                                                              |
| c4 | C 1.685666 -2.530321 -0.170025<br>C 2.852682 -1.731217 -0.284868<br>C 2.535758 -0.325475 0.055551<br>C 1.227168 -0.418893 0.452657<br>C 0.319821 0.599755 0.448465<br>C -0.954835 0.007122 0.329148                                                                                                                                                                                                                                                                                                                                                                                                                                                                                                                                                                                                                                                                                                                                                                        |

|        |                                 |
|--------|---------------------------------|
|        | C -2.062167 0.792112 0.038436   |
|        | C -3.253870 0.060899 -0.203580  |
|        | C -3.218781 -1.332853 -0.211419 |
|        | C -2.036574 -2.094350 -0.031348 |
|        | C -0.846805 -1.426859 0.231737  |
|        | C 0.607910 -1.714710 0.264387   |
|        | H 1.651434 -3.579222 -0.430640  |
|        | H 3.807423 -2.106115 -0.632514  |
|        | H -4.187021 0.571857 -0.416597  |
|        | H -4.140726 -1.867838 -0.411372 |
|        | H -2.078807 -3.172629 -0.135208 |
|        | C 0.659720 1.908126 0.131484    |
|        | C 2.966138 1.013198 -0.184549   |
|        | H 3.984887 1.228776 -0.489762   |
|        | C 2.059374 2.090851 -0.119436   |
|        | H 2.436315 3.080878 -0.354655   |
|        | C -0.505809 2.745755 -0.077624  |
|        | H -0.384258 3.807124 -0.269301  |
|        | C -1.781381 2.215436 -0.097504  |
|        | H -2.613344 2.885717 -0.289029  |
|        | C -3.039278 -1.881125 -0.000284 |
|        | C -3.677803 -0.688940 -0.000193 |
|        | C -1.974568 0.884049 -0.000161  |
|        | C -0.885677 0.076098 -0.000099  |
|        | C -0.619610 -1.355059 -0.000100 |
|        | C -1.650668 -2.238482 -0.000201 |
|        | H -3.773177 -2.683931 -0.000456 |
|        | C 0.346642 0.766348 -0.000009   |
|        | C 1.382652 -0.176383 0.000058   |
|        | C 2.721206 0.209372 0.000181    |
|        | C 3.645855 -0.863027 0.000255   |
|        | C 3.174866 -2.173212 0.000206   |
|        | C 1.798662 -2.516011 0.000087   |
|        | C 0.862308 -1.493866 0.000009   |
|        | H 4.714228 -0.675378 0.000355   |
|        | H 3.898846 -2.980910 0.000265   |
|        | H 1.514045 -3.562456 0.000063   |
|        | C -1.920487 2.279330 -0.000102  |
|        | H -2.827706 2.872160 -0.000136  |
|        | C -0.670553 2.913493 -0.000009  |
|        | H -0.633431 3.997743 0.000021   |
|        | C 0.525855 2.144004 0.000045    |
|        | C 2.944419 1.639584 0.000230    |
|        | H 3.965965 2.006101 0.000323    |
|        | C 1.914292 2.553781 0.000168    |
|        | H 2.151902 3.612490 0.000214    |
|        | H -1.451296 -3.304932 -0.000240 |
|        | O -4.603508 0.029923 -0.000111  |
| cts1-5 | C 1.919126 -1.740759 -0.393885  |
|        | C 3.038480 -0.710564 -0.544435  |
|        | C 1.869428 1.020932 -0.283338   |
|        | C 0.760402 0.252155 -0.200989   |
|        | C -0.506582 0.782273 -0.062389  |
|        | C -1.424772 -0.275518 -0.001359 |
|        | C -2.784324 -0.028382 0.147988  |
|        | C -3.585913 -1.197552 0.196303  |
|        | C -2.985023 -2.449422 0.097678  |
|        | C -1.585220 -2.646813 -0.052651 |
|        | C -0.766485 -1.532817 -0.104416 |
|        | C 0.694684 -1.203560 -0.242639  |
|        | C 4.163827 -0.890692 0.234076   |
|        | H 2.159328 -2.795398 -0.436098  |
|        | H 3.323314 -0.483170 -1.574337  |
|        | H -4.663085 -1.130312 0.308258  |
|        | H -3.618651 -3.328641 0.137542  |
|        | H -1.196692 -3.656694 -0.121068 |
|        | O 4.981687 -0.616688 1.020154   |
|        | C -0.792734 2.134209 0.010549   |
|        | C 1.656617 2.424976 -0.230596   |
|        | H 2.490449 3.116457 -0.294830   |
|        | C 0.365550 2.966664 -0.079842   |
|        | H 0.265526 4.046720 -0.031164   |
|        | C -3.138260 1.378588 0.226635   |
|        | H -4.185161 1.640702 0.342027   |
|        | C -2.209991 2.399564 0.162914   |
|        | H -2.561378 3.424151 0.230818   |
| cts5-3 |                                 |

|        |          |           |           |           |           |
|--------|----------|-----------|-----------|-----------|-----------|
| cTS1-3 | C        | -2.700179 | -1.172940 | 0.681154  |           |
|        | C        | -3.451771 | -0.667880 | -0.448041 |           |
|        | C        | -2.095314 | 0.262798  | 0.116677  |           |
|        | C        | -0.809100 | -0.133793 | -0.222115 |           |
|        | C        | -0.427730 | -1.502030 | -0.024306 |           |
|        | C        | -1.530674 | -2.134350 | 0.461545  |           |
|        | H        | -3.222580 | -1.252798 | 1.641835  |           |
|        | C        | 0.274241  | 0.696134  | -0.309198 |           |
|        | C        | 1.424049  | -0.117955 | -0.279580 |           |
|        | C        | 2.684600  | 0.452061  | -0.142132 |           |
|        | C        | 3.741560  | -0.486128 | -0.017545 |           |
|        | C        | 3.452963  | -1.846289 | 0.028552  |           |
|        | C        | 2.133320  | -2.374542 | -0.002965 |           |
|        | C        | 1.075272  | -1.496839 | -0.150293 |           |
|        | H        | 4.771246  | -0.155418 | 0.069172  |           |
|        | H        | 4.275869  | -2.544656 | 0.133498  |           |
|        | H        | 1.987004  | -3.442234 | 0.115099  |           |
|        | C        | -2.199567 | 1.689147  | 0.382142  |           |
|        | H        | -3.160347 | 2.117855  | 0.642724  |           |
|        | C        | -1.097576 | 2.531995  | 0.272322  |           |
|        | H        | -1.249471 | 3.584959  | 0.487502  |           |
|        | C        | 0.228859  | 2.057731  | -0.045535 |           |
|        | C        | 2.692082  | 1.901008  | -0.036267 |           |
|        | H        | 3.647898  | 2.407307  | 0.050562  |           |
|        | C        | 1.535945  | 2.661277  | 0.035707  |           |
|        | H        | 1.629370  | 3.730880  | 0.194055  |           |
|        | H        | -1.634143 | -3.167500 | 0.768181  |           |
|        | O        | -4.578841 | -0.399354 | -0.737919 |           |
|        | cTS3-4   | C         | 4.067624  | -0.787761 | 0.496716  |
|        |          | C         | 2.786295  | -0.528472 | -0.883059 |
|        |          | C         | 1.998581  | 0.671171  | -0.433112 |
|        |          | C         | 1.943850  | 2.094109  | -0.511127 |
|        |          | C         | 0.750769  | 2.788605  | -0.226955 |
| C      |          | -0.471219 | 2.120082  | 0.121084  |           |
| C      |          | -1.860373 | 2.532350  | 0.186666  |           |
| C      |          | -2.884859 | 1.606378  | 0.259669  |           |
| C      |          | -2.674744 | 0.165727  | 0.235785  |           |
| C      |          | -3.595957 | -0.903307 | 0.095385  |           |
| C      |          | -3.120487 | -2.200398 | -0.080935 |           |
| C      |          | -1.742586 | -2.535147 | -0.171025 |           |
| C      |          | -0.803569 | -1.528038 | -0.020929 |           |
| C      |          | 0.669567  | -1.313903 | -0.221044 |           |
| C      |          | 1.851094  | -1.705775 | -0.800255 |           |
| C      |          | 0.849638  | 0.100197  | 0.025863  |           |
| C      |          | -0.326555 | 0.749516  | 0.265043  |           |
| C      |          | -1.341020 | -0.224041 | 0.243628  |           |
| H      |          | 3.458744  | -0.468069 | -1.730982 |           |
| H      |          | 2.800614  | 2.672965  | -0.839252 |           |
| H      |          | 0.757068  | 3.867216  | -0.344538 |           |
| H      |          | -2.118040 | 3.585605  | 0.141280  |           |
| H      |          | -3.905924 | 1.974089  | 0.281460  |           |
| H      |          | -4.665696 | -0.722159 | 0.095393  |           |
| H      |          | -3.843226 | -3.000823 | -0.195703 |           |
| H      |          | -1.459851 | -3.560083 | -0.382778 |           |
| H      |          | 2.126010  | -2.679702 | -1.183048 |           |
| O      | 3.784251 | -1.034601 | 1.583722  |           |           |
| d      | C        | 2.441707  | 2.604398  | -0.000016 |           |
|        | C        | 3.042648  | 1.344116  | -0.000018 |           |
|        | C        | 2.225316  | 0.199202  | -0.000056 |           |
|        | C        | 0.866447  | 0.434684  | -0.000081 |           |
|        | C        | 0.209486  | 1.689546  | -0.000073 |           |
|        | C        | 1.037517  | 2.801900  | -0.000042 |           |
|        | H        | 3.078929  | 3.481738  | 0.000006  |           |
|        | H        | 4.121491  | 1.245271  | 0.000001  |           |
|        | C        | -0.084090 | -0.608304 | -0.000059 |           |
|        | C        | -1.352538 | -0.044445 | -0.000052 |           |
|        | C        | -2.501505 | -0.832630 | 0.000017  |           |
|        | C        | -3.714935 | -0.100812 | 0.000038  |           |
|        | C        | -3.672920 | 1.289918  | 0.000002  |           |
|        | C        | -2.466830 | 2.051136  | -0.000045 |           |
|        | C        | -1.262597 | 1.377227  | -0.000071 |           |
|        | H        | -4.673373 | -0.608485 | 0.000087  |           |
|        | H        | -4.611653 | 1.832850  | 0.000022  |           |
|        | H        | -2.528056 | 3.133689  | -0.000051 |           |
|        | C        | 2.634248  | -1.243359 | -0.000070 |           |
|        | C        | 1.570847  | -2.278814 | 0.000044  |           |

|    |                                                                                                                                                                                                                                                                                                                                                                                                                                                                                                                                                                                                                                                                                                                                                                                                                                                                                                                                                                    |
|----|--------------------------------------------------------------------------------------------------------------------------------------------------------------------------------------------------------------------------------------------------------------------------------------------------------------------------------------------------------------------------------------------------------------------------------------------------------------------------------------------------------------------------------------------------------------------------------------------------------------------------------------------------------------------------------------------------------------------------------------------------------------------------------------------------------------------------------------------------------------------------------------------------------------------------------------------------------------------|
|    | H 1.938890 -3.298860 0.000116<br>C 0.192311 -1.969818 0.000019<br>C -2.261619 -2.262080 0.000083<br>H -3.114678 -2.932632 0.000139<br>C -0.994162 -2.806175 0.000090<br>H -0.884698 -3.885130 0.000150<br>H 0.645980 3.813235 -0.000031<br>O 3.821399 -1.581977 0.000162                                                                                                                                                                                                                                                                                                                                                                                                                                                                                                                                                                                                                                                                                           |
| d3 | C -1.822716 2.869765 0.465913<br>C -2.555335 1.666479 0.592844<br>C -1.931283 0.483603 0.183622<br>C -0.686783 0.670001 -0.370534<br>C 0.167930 1.775909 -0.358833<br>C -0.472287 2.951726 0.054253<br>H -2.306138 3.786732 0.785106<br>H -3.540257 1.690709 1.045242<br>C 0.029861 -0.536880 -0.440072<br>C 1.380279 -0.256552 -0.457912<br>C 2.274445 -1.247385 -0.050301<br>C 3.609040 -0.778294 0.126259<br>C 3.867341 0.580185 0.011703<br>C 2.863387 1.574819 -0.212408<br>C 1.564389 1.168681 -0.439038<br>H 4.410724 -1.454470 0.403479<br>H 4.883161 0.923942 0.174395<br>H 3.140506 2.620697 -0.136981<br>C -3.173926 -1.814254 -0.268793<br>C -2.045770 -1.067314 0.452789<br>H -2.243865 -1.244495 1.517093<br>C -0.608720 -1.603949 0.101308<br>C 1.659201 -2.497010 0.332871<br>H 2.299635 -3.319196 0.635372<br>C 0.273918 -2.670831 0.453511<br>H -0.094183 -3.604895 0.863868<br>H 0.041065 3.903890 0.132648<br>O -4.118561 -1.364389 -0.810416  |
| d5 | C 2.590536 3.139639 -0.000032<br>C 1.261976 3.594585 -0.000159<br>C 0.267747 2.642310 -0.000165<br>C 0.473697 1.286957 -0.000056<br>C 1.842683 0.845088 0.000073<br>C 2.879159 1.772063 0.000083<br>H 3.398741 3.862986 -0.000024<br>H 1.042482 4.656296 -0.000247<br>C -0.394002 0.102925 -0.000037<br>C 0.469655 -1.017416 0.000103<br>C 0.039430 -2.349865 0.000164<br>C 1.052908 -3.342005 0.000306<br>C 2.387127 -2.971896 0.000377<br>C 2.796244 -1.614182 0.000313<br>C 1.831201 -0.626916 0.000175<br>H 0.781866 -4.392507 0.000359<br>H 3.148919 -3.743389 0.000485<br>H 3.854524 -1.376756 0.000373<br>C -4.009639 0.925758 -0.000347<br>C -2.693695 1.025271 -0.000272<br>H -2.304713 2.038741 -0.000304<br>C -1.766897 -0.100120 -0.000125<br>C -1.373530 -2.540839 0.000075<br>H -1.783392 -3.545289 0.000115<br>C -2.224401 -1.460857 -0.000063<br>H -3.294497 -1.644029 -0.000129<br>H 3.911623 1.440356 0.000180<br>O -5.167092 0.855072 -0.000411 |
| CO | C 0.000000 0.000000 -0.643976<br>O 0.000000 0.000000 0.482982                                                                                                                                                                                                                                                                                                                                                                                                                                                                                                                                                                                                                                                                                                                                                                                                                                                                                                      |
| d4 | C -3.263688 -1.236654 -0.404380<br>C -3.339133 0.171941 -0.388680<br>C -2.221987 0.886244 0.087531<br>C -1.214937 0.060748 0.595936<br>C -0.981392 -1.299397 0.402241<br>C -2.106060 -1.986170 -0.082911<br>H -4.122375 -1.781436 -0.781919<br>H -4.209820 0.658308 -0.815116<br>C -0.012429 0.788240 0.677474<br>C 1.044535 -0.076204 0.519890                                                                                                                                                                                                                                                                                                                                                                                                                                                                                                                                                                                                                    |

|        |                                 |
|--------|---------------------------------|
|        | C 2.262374 0.427037 0.046530    |
|        | C 3.200137 -0.577385 -0.316148  |
|        | C 2.804750 -1.910131 -0.304927  |
|        | C 1.473225 -2.349088 -0.019686  |
|        | C 0.539540 -1.419832 0.387530   |
|        | H 4.195054 -0.318278 -0.662626  |
|        | H 3.525115 -2.661325 -0.610361  |
|        | H 1.218243 -3.388210 -0.198169  |
|        | C -1.573487 2.201357 -0.120198  |
|        | H -2.049080 3.063404 -0.570622  |
|        | C -0.144816 2.072385 0.185240   |
|        | C 2.269192 1.852573 -0.221778   |
|        | H 3.195364 2.308690 -0.556582   |
|        | C 1.122053 2.644493 -0.203266   |
|        | H 1.198634 3.668214 -0.554413   |
|        | H -2.098395 -3.050318 -0.292596 |
| dTS1-5 | C -2.248442 2.880752 -0.051492  |
|        | C -2.977424 1.676575 -0.058229  |
|        | C -2.229289 0.518855 -0.066848  |
|        | C -0.872058 0.503447 -0.016712  |
|        | C -0.124546 1.725644 0.004684   |
|        | C -0.842862 2.915284 -0.013612  |
|        | H -2.798680 3.815184 -0.075771  |
|        | H -4.060432 1.680166 -0.070799  |
|        | C 0.021350 -0.608037 0.008479   |
|        | C 1.320792 -0.095824 0.036504   |
|        | C 2.453160 -0.912762 0.018869   |
|        | C 3.694657 -0.225553 0.024126   |
|        | C 3.714763 1.162079 0.032981    |
|        | C 2.536121 1.958265 0.030519    |
|        | C 1.308266 1.326152 0.035980    |
|        | H 4.629091 -0.776792 0.015750   |
|        | H 4.673237 1.669090 0.037032    |
|        | H 2.627994 3.038932 0.023367    |
|        | C -2.778526 -1.687415 0.039586  |
|        | C -1.632201 -2.407174 -0.075243 |
|        | H -1.847239 -3.455169 -0.270661 |
|        | C -0.263371 -1.955373 -0.037604 |
|        | C 2.181378 -2.320461 -0.026015  |
|        | H 3.009885 -3.021065 -0.042070  |
|        | C 0.890299 -2.813847 -0.058750  |
|        | H 0.741275 -3.887891 -0.095905  |
|        | H -0.338497 3.875166 0.005437   |
|        | O -3.943629 -1.597659 0.188786  |
| dTS5-3 | C 1.798057 3.146995 0.115688    |
|        | C 2.642088 2.036513 -0.116423   |
|        | C 2.034465 0.810280 -0.393885   |
|        | C 0.672333 0.825756 -0.440715   |
|        | C -0.229201 1.869352 -0.153104  |
|        | C 0.386691 3.091513 0.121259    |
|        | H 2.269148 4.099458 0.337362    |
|        | H 3.716563 2.166675 -0.048582   |
|        | C -0.009645 -0.402624 -0.525099 |
|        | C -1.353324 -0.193594 -0.292036 |
|        | C -2.199074 -1.277065 -0.064885 |
|        | C -3.524238 -0.900071 0.303766  |
|        | C -3.822366 0.444032 0.469819   |
|        | C -2.873765 1.507404 0.328854   |
|        | C -1.586802 1.198622 -0.058285  |
|        | H -4.290190 -1.646096 0.486597  |
|        | H -4.831351 0.711899 0.764583   |
|        | H -3.186294 2.519629 0.561110   |
|        | C 2.966631 -1.960450 0.381477   |
|        | C 2.165413 -1.283656 -0.551138  |
|        | H 2.617019 -1.351895 -1.542538  |
|        | C 0.662416 -1.578984 -0.499160  |
|        | C -1.554842 -2.563832 -0.122586 |
|        | H -2.150853 -3.456938 0.033299  |
|        | C -0.177037 -2.719677 -0.310100 |
|        | H 0.242131 -3.719438 -0.283628  |
|        | H -0.174380 3.985925 0.369289   |
|        | O 3.725176 -1.951538 1.270229   |
| dTS1-3 | C -2.077900 2.622092 0.525524   |
|        | C -2.736906 1.382434 0.555244   |
|        | C -2.033517 0.256512 0.073164   |
|        | C -0.755045 0.526011 -0.393114  |

|          |                                 |
|----------|---------------------------------|
|          | C -0.008456 1.707613 -0.326854  |
|          | C -0.732183 2.816715 0.126658   |
|          | H -2.625796 3.485938 0.886588   |
|          | H -3.752315 1.313623 0.925647   |
|          | C 0.080700 -0.597957 -0.455815  |
|          | C 1.399749 -0.182705 -0.463431  |
|          | C 2.398553 -1.074701 -0.069691  |
|          | C 3.675477 -0.470366 0.121023   |
|          | C 3.789481 0.908857 0.039603    |
|          | C 2.682293 1.791059 -0.163994   |
|          | C 1.438245 1.250828 -0.411954   |
|          | H 4.542891 -1.066235 0.384066   |
|          | H 4.762424 1.355988 0.211902    |
|          | H 2.840446 2.859141 -0.061348   |
|          | C -2.903044 -1.235620 -0.520318 |
|          | C -1.881220 -1.513881 0.453268  |
|          | H -2.217002 -1.902841 1.420925  |
|          | C -0.424608 -1.746107 0.072644  |
|          | C 1.929259 -2.387692 0.296820   |
|          | H 2.655970 -3.136480 0.594533   |
|          | C 0.573301 -2.710180 0.413532   |
|          | H 0.305629 -3.681608 0.814226   |
|          | H -0.284454 3.796261 0.250029   |
|          | O -4.089111 -1.385157 -0.582554 |
| dTSts3-4 | C 1.864886 2.874377 -0.548562   |
|          | C 2.563141 1.673659 -0.808252   |
|          | C 1.969309 0.473271 -0.394503   |
|          | C 0.792979 0.643901 0.319041    |
|          | C -0.046048 1.755219 0.423743   |
|          | C 0.563811 2.945212 0.000992    |
|          | H 2.320892 3.801425 -0.878768   |
|          | H 3.486608 1.711338 -1.375537   |
|          | C 0.063651 -0.559537 0.346466   |
|          | C -1.278972 -0.267098 0.453258  |
|          | C -2.209527 -1.200750 -0.012772 |
|          | C -3.540733 -0.701377 -0.089792 |
|          | C -3.773529 0.645229 0.154038   |
|          | C -2.742246 1.601920 0.413040   |
|          | C -1.443103 1.159735 0.551056   |
|          | H -4.362495 -1.339650 -0.396806 |
|          | H -4.789142 1.015207 0.064254   |
|          | H -3.000750 2.655268 0.427139   |
|          | C 3.287329 -1.804200 0.499334   |
|          | C 2.015030 -1.008026 -0.750733  |
|          | H 2.482373 -1.311605 -1.679192  |
|          | C 0.654129 -1.559321 -0.377825  |
|          | C -1.636254 -2.409443 -0.561497 |
|          | H -2.307231 -3.184875 -0.916823 |
|          | C -0.266194 -2.579652 -0.784436 |
|          | H 0.061161 -3.460930 -1.325667  |
|          | H 0.051073 3.900934 0.007319    |
|          | O 3.128945 -1.735729 1.634812   |
| e        | C -2.378971 -2.856904 0.000028  |
|          | C -3.058626 -1.646603 0.000023  |
|          | C -2.318301 -0.427495 -0.000010 |
|          | C -0.929834 -0.595006 -0.000045 |
|          | C -0.201217 -1.804941 -0.000030 |
|          | C -0.959599 -2.967116 0.000006  |
|          | H -2.957186 -3.774129 0.000055  |
|          | H -4.142797 -1.635216 0.000048  |
|          | C -0.047964 0.506143 -0.000056  |
|          | C 1.255654 0.014609 -0.000048   |
|          | C 2.353242 0.871273 -0.000010   |
|          | C 3.611880 0.206372 0.000026    |
|          | C 3.651509 -1.179991 0.000032   |
|          | C 2.490157 -2.010942 0.000010   |
|          | C 1.250468 -1.407174 -0.000032  |
|          | H 4.538491 0.770185 0.000054    |
|          | H 4.619799 -1.668268 0.000063   |
|          | H 2.614388 -3.088199 0.000030   |
|          | C -2.757432 0.924310 0.000007   |
|          | H -3.812702 1.174817 0.000031   |
|          | C -1.854036 2.099121 0.000009   |
|          | C -0.383924 1.831616 -0.000021  |
|          | C 2.031484 2.275314 0.000009    |
|          | H 2.839533 2.999396 0.000034    |



|    |                                 |
|----|---------------------------------|
|    | C 0.721592 2.738583 0.000006    |
|    | H 0.528952 3.804982 0.000031    |
|    | H -0.507459 -3.952586 0.000022  |
|    | O -2.322189 3.242750 0.000027   |
| e3 | C -1.822716 2.869765 0.465913   |
|    | C -2.555335 1.666479 0.592844   |
|    | C -1.931283 0.483603 0.183622   |
|    | C -0.686783 0.670001 -0.370534  |
|    | C 0.167930 1.775909 -0.358833   |
|    | C -0.472287 2.951726 0.054253   |
|    | H -2.306138 3.786732 0.785106   |
|    | H -3.540257 1.690709 1.045242   |
|    | C 0.029861 -0.536880 -0.440072  |
|    | C 1.380279 -0.256552 -0.457912  |
|    | C 2.274445 -1.247385 -0.050301  |
|    | C 3.609040 -0.778294 0.126259   |
|    | C 3.867341 0.580185 0.011703    |
|    | C 2.863387 1.574819 -0.212408   |
|    | C 1.564389 1.168681 -0.439038   |
|    | H 4.410724 -1.454470 0.403479   |
|    | H 4.883161 0.923942 0.174395    |
|    | H 3.140506 2.620697 -0.136981   |
|    | C -3.173926 -1.814254 -0.268793 |
|    | C -2.045770 -1.067314 0.452789  |
|    | H -2.243865 -1.244495 1.517093  |
|    | C -0.608720 -1.603949 0.101308  |
|    | C 1.659201 -2.497010 0.332871   |
|    | H 2.299635 -3.319196 0.635372   |
|    | C 0.273918 -2.670831 0.453511   |
|    | H -0.094183 -3.604895 0.863868  |
|    | H 0.041065 3.903890 0.132648    |
|    | O -4.118561 -1.364389 -0.810416 |
| e5 | C -1.844183 2.826653 0.000000   |
|    | C -0.481988 3.099239 0.000000   |
|    | C 0.477608 2.066336 0.000000    |
|    | C 0.000000 0.750952 0.000000    |
|    | C -1.398488 0.475975 0.000000   |
|    | C -2.321279 1.511396 0.000000   |
|    | H -2.547052 3.652125 0.000000   |
|    | H -0.152368 4.133305 0.000000   |
|    | C 0.716041 -0.533040 0.000000   |
|    | C -0.283828 -1.553732 0.000000  |
|    | C -0.017107 -2.929813 0.000000  |
|    | C -1.156117 -3.782180 0.000000  |
|    | C -2.428612 -3.242526 0.000000  |
|    | C -2.662193 -1.842042 0.000000  |
|    | C -1.580135 -0.987065 0.000000  |
|    | H -1.023928 -4.858795 0.000000  |
|    | H -3.283382 -3.909661 0.000000  |
|    | H -3.681649 -1.471713 0.000000  |
|    | C 1.918251 2.324242 0.000000    |
|    | H 2.614612 1.491862 0.000000    |
|    | C 2.473788 3.519481 0.000000    |
|    | C 1.992790 -1.001501 0.000000   |
|    | C 1.352605 -3.321187 0.000000   |
|    | H 1.618977 -4.373072 0.000000   |
|    | C 2.349184 -2.356261 0.000000   |
|    | H 3.392485 -2.652167 0.000000   |
|    | H -3.386923 1.313536 0.000000   |
|    | O 2.976401 4.565626 0.000000    |
| CO | C 0.000000 0.000000 -0.643976   |
|    | O 0.000000 0.000000 0.482982    |
| e4 | C -3.263688 -1.236654 -0.404380 |
|    | C -3.339133 0.171941 -0.388680  |
|    | C -2.221987 0.886244 0.087531   |
|    | C -1.214937 0.060748 0.595936   |
|    | C -0.981392 -1.299397 0.402241  |
|    | C -2.106060 -1.986170 -0.082911 |
|    | H -4.122375 -1.781436 -0.781919 |
|    | H -4.209820 0.658308 -0.815116  |
|    | C -0.012429 0.788240 0.677474   |
|    | C 1.044535 -0.076204 0.519890   |
|    | C 2.262374 0.427037 0.046530    |
|    | C 3.200137 -0.577385 -0.316148  |
|    | C 2.804750 -1.910131 -0.304927  |
|    | C 1.473225 -2.349088 -0.019686  |

|        |                                                                                                                                                                                                                                                                                                                                                                                                                                                                                                                                                                                                                                                                                                                                                                                                                                                                                                                                                                           |
|--------|---------------------------------------------------------------------------------------------------------------------------------------------------------------------------------------------------------------------------------------------------------------------------------------------------------------------------------------------------------------------------------------------------------------------------------------------------------------------------------------------------------------------------------------------------------------------------------------------------------------------------------------------------------------------------------------------------------------------------------------------------------------------------------------------------------------------------------------------------------------------------------------------------------------------------------------------------------------------------|
|        | C 0.539540 -1.419832 0.387530<br>H 4.195054 -0.318278 -0.662626<br>H 3.525115 -2.661325 -0.610361<br>H 1.218243 -3.388210 -0.198169<br>C -1.573487 2.201357 -0.120198<br>H -2.049080 3.063404 -0.570622<br>C -0.144816 2.072385 0.185240<br>C 2.269192 1.852573 -0.221778<br>H 3.195364 2.308690 -0.556582<br>C 1.122053 2.644493 -0.203266<br>H 1.198634 3.668214 -0.554413<br>H -2.098395 -3.050318 -0.292596                                                                                                                                                                                                                                                                                                                                                                                                                                                                                                                                                           |
| eTS1-5 | C -2.170841 -2.985139 -0.014230<br>C -2.924755 -1.813212 -0.045973<br>C -2.289410 -0.551707 -0.032570<br>C -0.901799 -0.589572 -0.001082<br>C -0.109289 -1.762059 0.026093<br>C -0.763333 -2.986940 0.022184<br>H -2.692385 -3.935900 -0.020524<br>H -4.007328 -1.874916 -0.071502<br>C -0.051696 0.559338 -0.031493<br>C 1.286236 0.100714 -0.014566<br>C 2.383627 0.962552 -0.023178<br>C 3.650791 0.313200 0.006262<br>C 3.714241 -1.069264 0.043049<br>C 2.561633 -1.905997 0.054413<br>C 1.314141 -1.317902 0.027646<br>H 4.565731 0.895668 0.001568<br>H 4.688713 -1.544463 0.065329<br>H 2.689957 -2.982576 0.083297<br>C -2.980966 0.720843 -0.059220<br>H -4.054088 0.726529 -0.237796<br>C -2.512756 1.987566 0.047347<br>C -0.266968 1.888825 -0.082312<br>C 2.088900 2.364199 -0.053807<br>H 2.900340 3.084429 -0.071277<br>C 0.776200 2.828661 -0.072157<br>H 0.574688 3.892977 -0.100169<br>H -0.222867 -3.926296 0.037522<br>O -2.658314 3.149989 0.191891 |
| eTS5-3 | C 1.993927 2.917810 0.074557<br>C 2.737369 1.737481 -0.134137<br>C 2.035033 0.550728 -0.376689<br>C 0.671356 0.689579 -0.397996<br>C -0.136243 1.804085 -0.132216<br>C 0.583028 2.979481 0.099188<br>H 2.544382 3.833456 0.260248<br>H 3.819810 1.769702 -0.085871<br>C -0.083294 -0.495016 -0.460915<br>C -1.410388 -0.168220 -0.235415<br>C -2.352788 -1.175718 -0.044855<br>C -3.650144 -0.687118 0.286558<br>C -3.843172 0.678885 0.438428<br>C -2.809817 1.659760 0.311152<br>C -1.540405 1.240726 -0.030705<br>H -4.481481 -1.365741 0.445906<br>H -4.835196 1.029936 0.701498<br>H -3.047803 2.698856 0.511519<br>C 3.344054 -1.433714 0.375394<br>C 2.396885 -0.936613 -0.534892<br>H 2.667469 -1.235879 -1.549006<br>C 0.472215 -1.722798 -0.470713<br>C -1.824566 -2.513454 -0.123434<br>H -2.499994 -3.353228 0.009511<br>C -0.463215 -2.790219 -0.316924<br>H -0.148023 -3.828123 -0.319051<br>H 0.101622 3.924216 0.326867<br>O 3.645025 -2.185900 1.217507  |
| eTS1-3 | C -1.912015 2.938355 -0.478743<br>C -2.632340 1.746244 -0.731284<br>C -2.058550 0.544395 -0.319439<br>C -0.847863 0.662994 0.343901<br>C 0.003696 1.775951 0.432760<br>C -0.601431 2.977413 0.040430<br>H -2.363838 3.875517 -0.784858<br>H -3.568798 1.795676 -1.275099                                                                                                                                                                                                                                                                                                                                                                                                                                                                                                                                                                                                                                                                                                  |

|        |                                                                                                                                                                                                                                                                                                                                                                                                                                                                                                                                                                                                                                                                                                                                                                                                                                                                                                                                                                          |
|--------|--------------------------------------------------------------------------------------------------------------------------------------------------------------------------------------------------------------------------------------------------------------------------------------------------------------------------------------------------------------------------------------------------------------------------------------------------------------------------------------------------------------------------------------------------------------------------------------------------------------------------------------------------------------------------------------------------------------------------------------------------------------------------------------------------------------------------------------------------------------------------------------------------------------------------------------------------------------------------|
|        | C -0.131283 -0.544072 0.413213<br>C 1.220650 -0.240486 0.460600<br>C 2.155692 -1.150102 -0.045349<br>C 3.469634 -0.646490 -0.169145<br>C 3.712582 0.704040 0.087914<br>C 2.686395 1.640786 0.379945<br>C 1.387462 1.185710 0.540089<br>H 4.277452 -1.276240 -0.526815<br>H 4.723806 1.077752 -0.029043<br>H 2.931410 2.697277 0.401675<br>C -2.175409 -0.972323 -0.649652<br>H -2.566958 -1.286117 -1.614661<br>C -2.373537 -1.914166 0.441934<br>C -0.733081 -1.614272 -0.258355<br>C 1.583668 -2.363841 -0.618505<br>H 2.264249 -3.109272 -1.018225<br>C 0.231086 -2.568572 -0.793157<br>H -0.104620 -3.454729 -1.319772<br>H -0.072203 3.924221 0.050943<br>O -2.929081 -2.151684 1.456613                                                                                                                                                                                                                                                                            |
| eTS3-4 | C 1.864886 2.874377 -0.548562<br>C 2.563141 1.673659 -0.808252<br>C 1.969309 0.473271 -0.394503<br>C 0.792979 0.643901 0.319041<br>C -0.046048 1.755219 0.423743<br>C 0.563811 2.945212 0.000992<br>H 2.320892 3.801425 -0.878768<br>H 3.486608 1.711338 -1.375537<br>C 0.063651 -0.559537 0.346466<br>C -1.278972 -0.267098 0.453258<br>C -2.209527 -1.200750 -0.012772<br>C -3.540733 -0.701377 -0.089792<br>C -3.773529 0.645229 0.154038<br>C -2.742246 1.601920 0.413040<br>C -1.443103 1.159735 0.551056<br>H -4.362495 -1.339650 -0.396806<br>H -4.789142 1.015207 0.064254<br>H -3.000750 2.655268 0.427139<br>C 3.287329 -1.804200 0.499334<br>C 2.015030 -1.008026 -0.750733<br>H 2.482373 -1.311605 -1.679192<br>C 0.654129 -1.559321 -0.377825<br>C -1.636254 -2.409443 -0.561497<br>H -2.307231 -3.184875 -0.916823<br>C -0.266194 -2.579652 -0.784436<br>H 0.061161 -3.460930 -1.325667<br>H 0.051073 3.900934 0.007319<br>O 3.128945 -1.735729 1.634812   |
| f      | C 3.456923 0.357260 -0.322189<br>C 3.018414 1.674294 -0.308097<br>C 1.675121 2.027582 0.077961<br>C 0.939987 0.980642 0.613419<br>C 1.390059 -0.362849 0.601160<br>C 2.595953 -0.744591 0.047435<br>H 4.450416 0.150025 -0.706718<br>H 3.684953 2.443528 -0.684339<br>C -0.465657 0.968212 0.647621<br>C -0.896821 -0.396908 0.664429<br>C -2.111545 -0.826588 0.195441<br>C -2.181162 -2.211018 -0.165027<br>C -1.046063 -3.015280 -0.195853<br>C 0.258857 -2.494913 0.121133<br>C 0.255971 -1.210694 0.639704<br>H -3.127556 -2.613910 -0.506923<br>H -1.142227 -4.032947 -0.560101<br>C 0.896563 3.205816 -0.238831<br>H 1.402042 4.096258 -0.598291<br>C -0.485696 3.202597 -0.201397<br>H -1.018097 4.088490 -0.530559<br>C -1.241606 2.013198 0.150782<br>C -3.090005 0.263430 -0.124315<br>C -2.582885 1.662238 -0.138746<br>H -3.301615 2.388015 -0.503624<br>C 2.677103 -2.148398 -0.295272<br>C 1.569300 -2.978290 -0.259436<br>H 3.611105 -2.550282 -0.674623 |

|                                |                                 |
|--------------------------------|---------------------------------|
|                                | H 1.677235 -3.998624 -0.612928  |
|                                | O -4.254140 0.029376 -0.460179  |
| f3                             | C 3.355845 -1.002037 0.120612   |
|                                | C 2.649616 -2.184593 0.205764   |
|                                | C 1.241504 -2.243498 -0.118935  |
|                                | C 0.753575 -1.128781 -0.801434  |
|                                | C 1.465319 0.117200 -0.836297   |
|                                | C 2.724775 0.239508 -0.271748   |
|                                | H 4.379442 -0.981476 0.481101   |
|                                | H 3.136589 -3.052938 0.637810   |
|                                | C -0.613108 -0.815084 -0.747642 |
|                                | C -0.758124 0.613727 -0.735944  |
|                                | C -1.765186 1.014402 0.098577   |
|                                | C -1.592081 2.301592 0.678745   |
|                                | C -0.369084 2.973451 0.547744   |
|                                | C 0.774546 2.372213 -0.077948   |
|                                | C 0.518028 1.194709 -0.781774   |
|                                | H -2.351134 2.738104 1.319151   |
|                                | H -0.245953 3.910985 1.080655   |
|                                | C 0.242767 -3.073104 0.493550   |
|                                | H 0.552149 -3.976942 1.008701   |
|                                | C -1.089871 -2.662435 0.634669  |
|                                | H -1.745863 -3.251930 1.266235  |
|                                | C -1.516978 -1.426000 0.076937  |
|                                | C -3.932334 -0.510427 0.000732  |
|                                | C -2.508222 -0.295522 0.538098  |
|                                | H -2.605509 -0.330777 1.628345  |
|                                | C 3.094984 1.574340 0.145714    |
|                                | C 2.165962 2.589628 0.250480    |
| H 4.102022 1.752074 0.509528   |                                 |
| H 2.469311 3.529316 0.700881   |                                 |
| O -4.592832 0.220981 -0.643977 |                                 |
| f5                             | C -1.969085 2.880983 0.000134   |
|                                | C -0.633756 3.252067 0.000081   |
|                                | C 0.444108 2.293082 -0.000001   |
|                                | C 0.047047 0.962729 -0.000034   |
|                                | C -1.304219 0.612862 0.000017   |
|                                | C -2.365469 1.494576 0.000109   |
|                                | H -2.726568 3.657799 0.000200   |
|                                | H -0.390997 4.309943 0.000107   |
|                                | C 0.858359 -0.201304 -0.000082  |
|                                | C -0.091901 -1.355828 -0.000057 |
|                                | C -0.143800 -2.719276 -0.000050 |
|                                | C -1.328969 -3.470898 0.000012  |
|                                | C -2.575415 -2.841826 0.000079  |
|                                | C -2.637450 -1.421931 0.000079  |
|                                | C -1.405465 -0.778087 0.000003  |
|                                | H -1.280001 -4.554507 0.000012  |
|                                | H -3.478107 -3.443998 0.000132  |
|                                | C 1.857089 2.469520 -0.000041   |
|                                | H 2.295247 3.462085 -0.000027   |
|                                | C 2.690084 1.365380 -0.000101   |
|                                | H 3.761889 1.538982 -0.000135   |
|                                | C 2.234078 0.000150 -0.000118   |
|                                | C 4.478592 -1.023368 -0.000138  |
|                                | C 3.162467 -1.124803 -0.000171  |
|                                | H 2.775967 -2.138369 -0.000223  |
|                                | C -3.656300 0.847657 0.000177   |
|                                | C -3.778095 -0.530496 0.000162  |
| H -4.558976 1.449852 0.000247  |                                 |
| H -4.773893 -0.961962 0.000220 |                                 |
| O 5.635505 -0.948372 -0.000110 |                                 |
| CO                             | C 0.000000 0.000000 -0.643976   |
|                                | O 0.000000 0.000000 0.482982    |
| f4                             | C -1.294097 2.727136 -0.295812  |
|                                | C -2.397172 1.894527 -0.331457  |
|                                | C -2.319111 0.523191 0.107890   |
|                                | C -1.168392 0.207031 0.835439   |
|                                | C 0.000000 1.046660 0.818337    |
|                                | C 0.000000 2.261847 0.151274    |
|                                | H -1.373933 3.713636 -0.741494  |
|                                | H -3.300816 2.250830 -0.815912  |
|                                | C -0.718478 -1.115232 0.901735  |
|                                | C 0.718478 -1.115232 0.901735   |
|                                | C 1.192293 -2.139778 0.086507   |
|                                | C 2.482034 -1.884322 -0.490897  |

|                                 |                                 |                               |
|---------------------------------|---------------------------------|-------------------------------|
|                                 | C 3.035043 -0.604674 -0.433708  |                               |
|                                 | C 2.319111 0.523191 0.107890    |                               |
|                                 | C 1.168392 0.207031 0.835439    |                               |
|                                 | H 2.987800 -2.635813 -1.088181  |                               |
|                                 | H 3.964811 -0.428256 -0.965341  |                               |
|                                 | C -3.035043 -0.604674 -0.433708 |                               |
|                                 | H -3.964811 -0.428256 -0.965341 |                               |
|                                 | C -2.482033 -1.884323 -0.490897 |                               |
|                                 | H -2.987799 -2.635813 -1.088181 |                               |
|                                 | C -1.192293 -2.139778 0.086507  |                               |
|                                 | C 0.000000 -2.875307 -0.349091  |                               |
|                                 | H 0.000000 -3.694526 -1.057627  |                               |
|                                 | C 1.294097 2.727136 -0.295812   |                               |
|                                 | C 2.397172 1.894527 -0.331457   |                               |
|                                 | H 1.373933 3.713636 -0.741495   |                               |
|                                 | H 3.300815 2.250831 -0.815912   |                               |
| fts1-5                          | C -3.394756 -0.971572 -0.173954 |                               |
|                                 | C -2.715897 -2.182227 -0.169697 |                               |
|                                 | C -1.301467 -2.273449 0.096202  |                               |
|                                 | C -0.712771 -1.084778 0.506856  |                               |
|                                 | C -1.411502 0.140088 0.499839   |                               |
|                                 | C -2.721300 0.279141 0.083935   |                               |
|                                 | H -4.445266 -0.968019 -0.445970 |                               |
|                                 | H -3.260746 -3.078955 -0.447385 |                               |
|                                 | C 0.670121 -0.821558 0.496282   |                               |
|                                 | C 0.832602 0.614715 0.483735    |                               |
|                                 | C 1.850094 1.413000 0.083792    |                               |
|                                 | C 1.649713 2.774753 -0.213360   |                               |
|                                 | C 0.349865 3.292689 -0.257125   |                               |
|                                 | C -0.779795 2.468894 0.047033   |                               |
|                                 | C -0.472712 1.187161 0.479270   |                               |
|                                 | H 2.486581 3.417178 -0.463285   |                               |
|                                 | H 0.210344 4.321373 -0.573660   |                               |
|                                 | C -0.360043 -3.312131 -0.211948 |                               |
|                                 | H -0.713165 -4.295547 -0.505049 |                               |
|                                 | C 1.003755 -3.063549 -0.236544  |                               |
|                                 | H 1.669362 -3.864200 -0.541899  |                               |
|                                 | C 1.572745 -1.769303 0.052802   |                               |
|                                 | C 3.517625 -0.148986 -0.105690  |                               |
|                                 | C 2.926989 -1.379993 -0.229304  |                               |
|                                 | H 3.589630 -2.075357 -0.739857  |                               |
|                                 | C -3.107775 1.643914 -0.200720  |                               |
|                                 | C -2.189506 2.679481 -0.213726  |                               |
|                                 | H -4.134101 1.860237 -0.479444  |                               |
|                                 | H -2.530602 3.668984 -0.500415  |                               |
|                                 | O 4.486506 0.512069 -0.026137   |                               |
|                                 | fts5-3                          | C 3.157857 -1.554780 0.108305 |
|                                 |                                 | C 2.246613 -2.590280 0.179341 |
| C 0.843535 -2.384271 -0.106433  |                                 |                               |
| C 0.547633 -1.164774 -0.709736  |                                 |                               |
| C 1.479565 -0.086570 -0.748503  |                                 |                               |
| C 2.761991 -0.208120 -0.242278  |                                 |                               |
| H 4.177437 -1.738488 0.432288   |                                 |                               |
| H 2.578249 -3.550646 0.560845   |                                 |                               |
| C -0.739997 -0.600988 -0.643277 |                                 |                               |
| C -0.618998 0.835508 -0.650175  |                                 |                               |
| C -1.526407 1.581955 0.031015   |                                 |                               |
| C -1.065835 2.824511 0.543258   |                                 |                               |
| C 0.290214 3.172365 0.461979    |                                 |                               |
| C 1.271142 2.280386 -0.081059   |                                 |                               |
| C 0.757049 1.142545 -0.698303   |                                 |                               |
| H -1.735485 3.499435 1.066526   |                                 |                               |
| H 0.611979 4.098588 0.929099    |                                 |                               |
| C -0.283615 -3.079833 0.441343  |                                 |                               |
| H -0.140993 -4.055841 0.893889  |                                 |                               |
| C -1.534768 -2.470044 0.569170  |                                 |                               |
| H -2.311244 -2.988329 1.121208  |                                 |                               |
| C -1.755680 -1.146876 0.087642  |                                 |                               |
| C -4.009766 -0.104540 0.046276  |                                 |                               |
| C -2.713048 -0.038871 0.557644  |                                 |                               |
| H -2.729392 0.091682 1.640855   |                                 |                               |
| C 3.395707 1.037327 0.129619    |                                 |                               |
| C 2.686012 2.219475 0.213749    |                                 |                               |
| H 4.429896 1.027514 0.458857    |                                 |                               |
| H 3.184775 3.097457 0.611902    |                                 |                               |
| O -4.900055 0.316734 -0.581616  |                                 |                               |

|        |           |           |           |           |           |
|--------|-----------|-----------|-----------|-----------|-----------|
| fts1-3 | C         | 3.393048  | -0.753090 | -0.024989 |           |
|        | C         | 2.792601  | -1.986932 | 0.111423  |           |
|        | C         | 1.372925  | -2.159041 | -0.106393 |           |
|        | C         | 0.748318  | -1.092427 | -0.753583 |           |
|        | C         | 1.352048  | 0.202156  | -0.844001 |           |
|        | C         | 2.635091  | 0.431174  | -0.366922 |           |
|        | H         | 4.436274  | -0.647582 | 0.255620  |           |
|        | H         | 3.377666  | -2.812795 | 0.503196  |           |
|        | C         | -0.637518 | -0.894830 | -0.630628 |           |
|        | C         | -0.910879 | 0.509287  | -0.658846 |           |
|        | C         | -1.946928 | 0.874591  | 0.218157  |           |
|        | C         | -1.777756 | 2.168549  | 0.854334  |           |
|        | C         | -0.619645 | 2.897957  | 0.673307  |           |
|        | C         | 0.532151  | 2.381457  | -0.041438 |           |
|        | C         | 0.317945  | 1.191686  | -0.738931 |           |
|        | H         | -2.550767 | 2.560025  | 1.505906  |           |
|        | H         | -0.524361 | 3.842075  | 1.200949  |           |
|        | C         | 0.497900  | -3.069633 | 0.571397  |           |
|        | H         | 0.919152  | -3.939465 | 1.065171  |           |
|        | C         | -0.854543 | -2.775536 | 0.793274  |           |
|        | H         | -1.415123 | -3.413207 | 1.468482  |           |
|        | C         | -1.438562 | -1.607555 | 0.236110  |           |
|        | C         | -3.470643 | -0.027680 | -0.208196 |           |
|        | C         | -2.500320 | -0.581464 | 0.716369  |           |
|        | H         | -2.803543 | -0.580818 | 1.760932  |           |
|        | C         | 2.920836  | 1.784362  | 0.035289  |           |
|        | C         | 1.906593  | 2.711030  | 0.213675  |           |
|        | H         | 3.927783  | 2.046348  | 0.343468  |           |
|        | H         | 2.148622  | 3.664521  | 0.672541  |           |
|        | O         | -4.173961 | -0.242935 | -1.134090 |           |
|        | fts3-4    | C         | 3.216411  | -1.293100 | -0.025009 |
|        |           | C         | 2.400778  | -2.394476 | 0.140286  |
|        |           | C         | 0.975484  | -2.313626 | -0.082048 |
| C      |           | 0.552297  | -1.167889 | -0.759535 |           |
| C      |           | 1.383331  | -0.000053 | -0.871376 |           |
| C      |           | 2.685824  | -0.000107 | -0.398164 |           |
| H      |           | 4.260103  | -1.370982 | 0.262637  |           |
| H      |           | 2.826287  | -3.299566 | 0.561912  |           |
| C      |           | -0.767532 | -0.717573 | -0.621980 |           |
| C      |           | -0.767467 | 0.717662  | -0.621990 |           |
| C      |           | -1.657252 | 1.203084  | 0.313564  |           |
| C      |           | -1.316031 | 2.472026  | 0.867926  |           |
| C      |           | -0.051214 | 3.022238  | 0.631354  |           |
| C      |           | 0.975692  | 2.313571  | -0.082091 |           |
| C      |           | 0.552402  | 1.167860  | -0.759555 |           |
| H      |           | -1.970471 | 2.973410  | 1.573131  |           |
| H      |           | 0.207012  | 3.941426  | 1.147600  |           |
| C      |           | -0.051484 | -3.022187 | 0.631411  |           |
| H      |           | 0.206660  | -3.941387 | 1.147676  |           |
| C      |           | -1.316253 | -2.471857 | 0.867971  |           |
| H      |           | -1.970736 | -2.973169 | 1.573187  |           |
| C      |           | -1.657361 | -1.202897 | 0.313582  |           |
| C      |           | -4.117006 | 0.000291  | -0.177375 |           |
| C      |           | -2.436518 | 0.000129  | 0.801034  |           |
| H      |           | -2.824722 | 0.000143  | 1.812089  |           |
| C      |           | 3.216527  | 1.292846  | -0.025034 |           |
| C      |           | 2.400993  | 2.394299  | 0.140240  |           |
| H      |           | 4.260226  | 1.370640  | 0.262609  |           |
| H      |           | 2.826583  | 3.299359  | 0.561847  |           |
| O      |           | -4.143834 | -0.000165 | -1.325243 |           |
| g      |           | C         | 0.523613  | 2.160029  | 0.664543  |
|        |           | C         | -0.891541 | 2.015479  | 0.674010  |
|        |           | C         | -1.469048 | 0.746642  | 0.973497  |
|        | C         | -0.635954 | -0.259026 | 1.449501  |           |
|        | C         | 0.754251  | -0.111067 | 1.447282  |           |
|        | C         | 1.352574  | 1.047251  | 0.959695  |           |
|        | C         | -0.931418 | -1.641379 | 1.231748  |           |
|        | C         | 0.284488  | -2.348969 | 1.102539  |           |
|        | C         | 0.402247  | -3.496117 | 0.298540  |           |
|        | C         | 1.725581  | -3.770717 | -0.193895 |           |
|        | C         | 2.759038  | -2.816670 | -0.107380 |           |
|        | C         | 2.507530  | -1.547448 | 0.531964  |           |
|        | C         | 1.327351  | -1.401212 | 1.221533  |           |
|        | C         | -2.738917 | 0.367022  | 0.441153  |           |
|        | C         | -3.040018 | -1.023690 | 0.235243  |           |
| C      | -2.063332 | -2.030376 | 0.552653  |           |           |

|  |   |           |           |           |
|--|---|-----------|-----------|-----------|
|  | C | -0.838874 | -4.039871 | -0.184626 |
|  | C | -2.047928 | -3.323657 | -0.088234 |
|  | C | 2.674940  | 0.934717  | 0.418473  |
|  | C | 3.253200  | -0.358916 | 0.209951  |
|  | C | -4.170994 | -1.396712 | -0.517513 |
|  | C | -3.558109 | 1.372520  | -0.130845 |
|  | C | -4.765459 | 0.960876  | -0.755676 |
|  | C | -5.062085 | -0.376465 | -0.938902 |
|  | H | -5.960543 | -0.653765 | -1.480161 |
|  | C | -3.052175 | 2.714935  | -0.198052 |
|  | C | -1.747613 | 3.026966  | 0.128903  |
|  | C | -1.150880 | 4.356408  | -0.213428 |
|  | C | 1.137189  | 3.341814  | 0.093012  |
|  | C | 0.307221  | 4.424779  | -0.238199 |
|  | H | 0.725652  | 5.351124  | -0.616093 |
|  | C | 2.520165  | 3.296627  | -0.212814 |
|  | C | 3.276694  | 2.094022  | -0.147011 |
|  | C | 4.555522  | 1.936841  | -0.756922 |
|  | H | 5.062492  | 2.814076  | -1.144758 |
|  | C | 4.443293  | -0.493751 | -0.537680 |
|  | C | 5.114920  | 0.689896  | -0.944660 |
|  | H | 6.057254  | 0.602765  | -1.475223 |
|  | C | 4.033057  | -2.914627 | -0.782483 |
|  | C | 4.837378  | -1.820780 | -0.948326 |
|  | C | -3.276707 | -3.684548 | -0.760396 |
|  | C | -4.286543 | -2.780687 | -0.926742 |
|  | H | 2.982461  | 4.178303  | -0.645040 |
|  | H | 5.774441  | -1.928865 | -1.484703 |
|  | H | -5.182544 | -3.077930 | -1.461785 |
|  | H | -3.666649 | 3.495680  | -0.633883 |
|  | H | -3.375583 | -4.681464 | -1.177073 |
|  | H | -0.828925 | -4.955914 | -0.767817 |
|  | H | 4.334640  | -3.868659 | -1.202071 |
|  | H | 1.903515  | -4.670307 | -0.775535 |
|  | H | -5.431797 | 1.716342  | -1.158293 |
|  | O | -1.846296 | 5.322224  | -0.535040 |
|  | C | 3.184770  | -0.453584 | 0.217355  |
|  | C | 2.630798  | 0.864688  | 0.371994  |
|  | C | 1.376053  | 1.016442  | 1.030745  |
|  | C | 0.723621  | -0.102821 | 1.564086  |
|  | C | 1.256216  | -1.413616 | 1.351040  |
|  | C | 2.425838  | -1.607011 | 0.640601  |
|  | C | -0.679782 | -0.205192 | 1.560857  |
|  | C | -1.015294 | -1.579456 | 1.346076  |
|  | C | -2.141625 | -1.940181 | 0.630609  |
|  | C | -2.157024 | -3.257210 | 0.034240  |
|  | C | -0.978121 | -4.024007 | 0.000295  |
|  | C | 0.268992  | -3.506014 | 0.487310  |
|  | C | 0.181684  | -2.331578 | 1.254270  |
|  | C | 0.565331  | 2.110652  | 0.690498  |
|  | C | -0.841720 | 2.008972  | 0.688826  |
|  | C | -1.486059 | 0.808435  | 1.026402  |
|  | C | -3.057234 | -0.908564 | 0.203148  |
|  | C | -2.701754 | 0.476114  | 0.360602  |
|  | C | 2.635246  | -2.907963 | 0.045985  |
|  | C | 1.580481  | -3.838089 | 0.007226  |
|  | C | -1.413470 | 2.979512  | -0.174000 |
|  | C | 0.998082  | 3.153329  | -0.168848 |
|  | C | -0.281851 | 5.310205  | 0.154321  |
|  | C | -0.274884 | 3.942647  | -0.581270 |
|  | H | -0.273601 | 4.167236  | -1.649248 |
|  | C | 2.287060  | 3.121573  | -0.640545 |
|  | C | 3.121269  | 1.954669  | -0.404678 |
|  | C | 4.334004  | 1.742003  | -1.111033 |
|  | C | 4.309745  | -0.649128 | -0.608256 |
|  | C | 4.918100  | 0.491356  | -1.190041 |
|  | H | 5.812324  | 0.360364  | -1.790499 |
|  | C | 4.686055  | -2.005439 | -0.942220 |
|  | C | 3.884238  | -3.072646 | -0.663838 |
|  | C | -3.365343 | -3.601273 | -0.681767 |
|  | C | -4.137226 | -1.264992 | -0.628944 |
|  | C | -4.311895 | -2.661426 | -0.963947 |
|  | C | -3.339155 | 1.483262  | -0.421271 |
|  | C | -4.503256 | 1.096834  | -1.135728 |
|  | H | -5.050917 | 1.849661  | -1.693339 |
|  | C | -4.900229 | -0.224999 | -1.216400 |

g3

|    |   |           |           |           |
|----|---|-----------|-----------|-----------|
|    | C | -2.680557 | 2.757955  | -0.654569 |
|    | H | 5.595070  | -2.155694 | -1.515436 |
|    | H | -5.187093 | -2.941180 | -1.541300 |
|    | H | -5.761882 | -0.484605 | -1.822647 |
|    | H | -3.155425 | 3.449279  | -1.343453 |
|    | H | 2.659538  | 3.878026  | -1.323506 |
|    | H | 4.771247  | 2.566941  | -1.664097 |
|    | O | -0.927931 | 5.640496  | 1.080001  |
|    | H | -3.487708 | -4.615549 | -1.047080 |
|    | H | -0.988849 | -4.959109 | -0.551860 |
|    | H | 1.730085  | -4.761810 | -0.543849 |
|    | H | 4.154036  | -4.058270 | -1.028494 |
|    | C | 3.334334  | 0.517755  | 0.169863  |
|    | C | 2.427566  | 1.613021  | 0.401055  |
|    | C | 1.119844  | 1.360149  | 0.939995  |
|    | C | 0.862664  | 0.073975  | 1.394038  |
|    | C | 1.766930  | -1.010636 | 1.165211  |
|    | C | 2.942291  | -0.829201 | 0.478643  |
|    | C | -0.431327 | -0.443765 | 1.400461  |
|    | C | -0.335246 | -1.854120 | 1.181631  |
|    | C | -1.317967 | -2.545250 | 0.516290  |
|    | C | -0.955527 | -3.788426 | -0.120910 |
|    | C | 0.403459  | -4.144770 | -0.225607 |
|    | C | 1.449683  | -3.279256 | 0.249647  |
|    | C | 1.025193  | -2.205475 | 1.051332  |
|    | C | -0.001392 | 2.243658  | 0.718323  |
|    | C | -1.348835 | 1.709519  | 0.732450  |
|    | C | -1.517840 | 0.304066  | 0.958594  |
|    | C | -2.539025 | -1.848953 | 0.226983  |
|    | C | -2.638059 | -0.432823 | 0.453630  |
|    | C | 3.531195  | -1.982352 | -0.159696 |
|    | C | 2.796705  | -3.181211 | -0.245523 |
|    | C | -2.543485 | 2.425587  | 0.330552  |
|    | C | 0.430872  | 3.517057  | 0.279446  |
|    | C | -3.290544 | 4.609730  | -0.533563 |
|    | C | -2.504589 | 3.890738  | 0.243388  |
|    | H | -1.785007 | 4.458058  | 0.822905  |
|    | C | 1.677581  | 3.889487  | -0.086393 |
|    | C | 2.727310  | 2.891826  | -0.122951 |
|    | C | 3.984133  | 3.087623  | -0.746721 |
|    | C | 4.517083  | 0.713227  | -0.570225 |
|    | C | 4.850812  | 2.032571  | -0.962857 |
|    | H | 5.778476  | 2.205003  | -1.498717 |
|    | C | 5.259537  | -0.458283 | -0.988318 |
|    | C | 4.786293  | -1.728825 | -0.831424 |
|    | C | -2.048385 | -4.476361 | -0.771625 |
|    | C | -3.542808 | -2.528757 | -0.489860 |
|    | C | -3.273221 | -3.887950 | -0.909301 |
|    | C | -3.744709 | 0.288778  | -0.042598 |
|    | C | -4.805445 | -0.444366 | -0.637662 |
|    | H | -5.684562 | 0.089284  | -0.983707 |
|    | C | -4.705571 | -1.804976 | -0.856477 |
|    | C | -3.688992 | 1.717665  | 0.008151  |
|    | H | 6.192939  | -0.301480 | -1.519247 |
|    | H | -4.063588 | -4.423969 | -1.424941 |
|    | H | -5.507816 | -2.322622 | -1.372187 |
|    | H | -4.578600 | 2.268318  | -0.282490 |
|    | H | 1.895702  | 4.899857  | -0.419172 |
|    | H | 4.240419  | 4.075134  | -1.115865 |
|    | O | -3.973476 | 5.254707  | -1.214829 |
|    | H | -1.875926 | -5.461877 | -1.191407 |
|    | H | 0.661288  | -5.025400 | -0.806504 |
|    | H | 3.213281  | -3.998641 | -0.826634 |
|    | H | 5.338100  | -2.563373 | -1.251237 |
|    | C | 0.000000  | 0.000000  | -0.643976 |
| CO | O | 0.000000  | 0.000000  | 0.482982  |
|    | C | 3.125555  | -0.362098 | 0.234446  |
|    | C | 2.671670  | 0.976721  | 0.470576  |
|    | C | 1.431340  | 1.182783  | 1.150379  |
|    | C | 0.704971  | 0.083363  | 1.625157  |
|    | C | 1.139939  | -1.247133 | 1.328847  |
|    | C | 2.289669  | -1.483065 | 0.599698  |
|    | C | -0.704953 | 0.083368  | 1.625147  |
|    | C | -1.139963 | -1.247167 | 1.328870  |
|    | C | -2.289621 | -1.483037 | 0.599554  |
| g4 | C | -2.402003 | -2.758188 | -0.071706 |



|        |   |           |           |           |
|--------|---|-----------|-----------|-----------|
|        | C | -1.283184 | -3.606263 | -0.157211 |
|        | C | -0.000015 | -3.208198 | 0.348768  |
|        | C | -0.000024 | -2.076369 | 1.182054  |
|        | C | 0.699599  | 2.343850  | 0.879660  |
|        | C | -0.699527 | 2.343757  | 0.879458  |
|        | C | -1.431284 | 1.182736  | 1.150293  |
|        | C | -3.125507 | -0.362121 | 0.234288  |
|        | C | -2.671612 | 0.976709  | 0.470463  |
|        | C | 2.402002  | -2.758135 | -0.071651 |
|        | C | 1.283170  | -3.606214 | -0.157262 |
|        | C | -1.169952 | 3.404584  | 0.025539  |
|        | C | 1.170002  | 3.404789  | 0.025707  |
|        | C | 0.000061  | 4.132159  | -0.411958 |
|        | H | -0.000005 | 4.963538  | -1.103324 |
|        | C | 2.486279  | 3.299839  | -0.434217 |
|        | C | 3.232744  | 2.076185  | -0.253366 |
|        | C | 4.428975  | 1.815929  | -0.976016 |
|        | C | 4.232749  | -0.591532 | -0.611538 |
|        | C | 4.921312  | 0.533611  | -1.130347 |
|        | H | 5.801897  | 0.373155  | -1.743686 |
|        | C | 4.508081  | -1.948359 | -1.025063 |
|        | C | 3.632177  | -2.970495 | -0.801101 |
|        | C | -3.632133 | -2.970445 | -0.801264 |
|        | C | -4.232748 | -0.591573 | -0.611618 |
|        | C | -4.508008 | -1.948344 | -1.025165 |
|        | C | -3.232774 | 2.076216  | -0.253307 |
|        | C | -4.429191 | 1.815947  | -0.975662 |
|        | H | -4.922672 | 2.637433  | -1.484991 |
|        | C | -4.921533 | 0.533630  | -1.129991 |
|        | C | -2.486250 | 3.299772  | -0.434272 |
|        | H | 5.400787  | -2.130143 | -1.614652 |
|        | H | -5.400464 | -2.130190 | -1.615124 |
|        | H | -5.802248 | 0.373291  | -1.743191 |
|        | H | -2.908534 | 4.050063  | -1.095542 |
|        | H | 2.908723  | 4.050066  | -1.095452 |
|        | H | 4.922251  | 2.637422  | -1.485519 |
|        | H | -3.827915 | -3.949677 | -1.225482 |
|        | H | -1.363971 | -4.504269 | -0.762477 |
|        | H | 1.364053  | -4.504097 | -0.762679 |
|        | H | 3.828032  | -3.949869 | -1.225008 |
|        | C | 3.107867  | -0.909925 | 0.178933  |
|        | C | 2.753505  | 0.477401  | 0.332492  |
|        | C | 1.465943  | 0.825720  | 0.859238  |
|        | C | 0.680215  | -0.196383 | 1.371175  |
|        | C | 1.036443  | -1.572601 | 1.215877  |
|        | C | 2.179079  | -1.943297 | 0.547966  |
|        | C | -0.712231 | -0.109375 | 1.362521  |
|        | C | -1.226732 | -1.436154 | 1.215419  |
|        | C | -2.407654 | -1.678063 | 0.555559  |
|        | C | -2.607067 | -2.991419 | -0.009499 |
|        | C | -1.529769 | -3.897744 | -0.058889 |
|        | C | -0.215908 | -3.534801 | 0.400852  |
|        | C | -0.144988 | -2.340732 | 1.139194  |
|        | C | 0.821765  | 2.076353  | 0.550705  |
|        | C | -0.612935 | 2.173657  | 0.534809  |
|        | C | -1.373046 | 1.001467  | 0.843221  |
|        | C | -3.211695 | -0.545448 | 0.191189  |
|        | C | -2.694459 | 0.787399  | 0.337681  |
|        | C | 2.219937  | -3.268544 | -0.023175 |
|        | C | 1.045024  | -4.044554 | -0.067091 |
|        | C | -1.342136 | 3.303613  | 0.001070  |
|        | C | 1.732624  | 3.017124  | 0.039402  |
|        | C | 0.491393  | 5.087076  | -0.036696 |
|        | C | -0.729017 | 4.597230  | -0.256761 |
|        | H | -1.357464 | 5.355801  | -0.720337 |
|        | C | 3.023307  | 2.830337  | -0.309030 |
|        | C | 3.555889  | 1.481272  | -0.261882 |
|        | C | 4.773725  | 1.091273  | -0.871792 |
|        | C | 4.256446  | -1.273749 | -0.551275 |
|        | C | 5.112472  | -0.242314 | -1.010026 |
|        | H | 6.022073  | -0.508502 | -1.538400 |
|        | C | 4.429522  | -2.670211 | -0.895024 |
|        | C | 3.461296  | -3.608431 | -0.682392 |
|        | C | -3.884291 | -3.185161 | -0.659166 |
|        | C | -4.400851 | -0.773167 | -0.528377 |
|        | C | -4.737448 | -2.139232 | -0.867879 |
| gTS1-5 |   |           |           |           |

|        |                                                                                                                                                                                                                                                                                                                                                                                                                                                                                                                                                                                                                                                                                                                                                                                                                                                                                                                                                                                                                                                                                                                                                                                                                                                                                                                                                                                                                                                                                                                                                                                                                                                                                                                                                                                                                     |
|--------|---------------------------------------------------------------------------------------------------------------------------------------------------------------------------------------------------------------------------------------------------------------------------------------------------------------------------------------------------------------------------------------------------------------------------------------------------------------------------------------------------------------------------------------------------------------------------------------------------------------------------------------------------------------------------------------------------------------------------------------------------------------------------------------------------------------------------------------------------------------------------------------------------------------------------------------------------------------------------------------------------------------------------------------------------------------------------------------------------------------------------------------------------------------------------------------------------------------------------------------------------------------------------------------------------------------------------------------------------------------------------------------------------------------------------------------------------------------------------------------------------------------------------------------------------------------------------------------------------------------------------------------------------------------------------------------------------------------------------------------------------------------------------------------------------------------------|
|        | C -3.363825 1.881046 -0.255174<br>C -4.630890 1.636491 -0.850484<br>H -5.185105 2.470483 -1.268503<br>C -5.130533 0.355293 -0.981608<br>C -2.680947 3.135244 -0.327854<br>H 5.338291 -2.953506 -1.416097<br>H -5.676352 -2.315929 -1.382747<br>H -6.071643 0.200732 -1.499318<br>H -3.217571 3.977587 -0.752741<br>H 3.639321 3.641448 -0.683600<br>H 5.419659 1.853696 -1.294119<br>O 1.395987 5.814579 0.097108<br>H -1.670282 -4.835078 -0.589053<br>H 1.073766 -4.990749 -0.599422<br>H 3.603730 -4.619626 -1.049038<br>H -4.146503 -4.173129 -1.022848                                                                                                                                                                                                                                                                                                                                                                                                                                                                                                                                                                                                                                                                                                                                                                                                                                                                                                                                                                                                                                                                                                                                                                                                                                                         |
| gTS5-3 | C 3.258666 -0.192715 0.205867<br>C 2.595045 1.074557 0.366580<br>C 1.298253 1.115750 0.963951<br>C 0.756235 -0.060911 1.482955<br>C 1.408700 -1.319717 1.292133<br>C 2.596817 -1.411208 0.598576<br>C -0.625979 -0.291732 1.483188<br>C -0.833328 -1.695019 1.294935<br>C -1.927654 -2.172742 0.605775<br>C -1.825024 -3.487818 0.016815<br>C -0.576330 -4.136209 -0.031578<br>C 0.620662 -3.499396 0.443284<br>C 0.426066 -2.333486 1.203874<br>C 0.398972 2.162403 0.629954<br>C -1.002016 1.916002 0.610784<br>C -1.516178 0.641213 0.947242<br>C -2.950602 -1.238235 0.210333<br>C -2.729652 0.175720 0.358060<br>C 2.927654 -2.688406 0.008810<br>C 1.959515 -3.709089 -0.035255<br>C -1.806382 2.835597 -0.118248<br>C 0.883522 3.299552 -0.043692<br>C -1.418060 5.261490 0.030719<br>C -1.043442 4.080484 -0.550092<br>H -0.869002 4.190378 -1.619038<br>C 2.179407 3.374824 -0.465278<br>C 3.059135 2.223458 -0.327993<br>C 4.306805 2.120498 -0.994674<br>C 4.424336 -0.284090 -0.580046<br>C 4.971621 0.912830 -1.105383<br>H 5.892999 0.862976 -1.676560<br>C 4.913472 -1.602135 -0.925280<br>C 4.198130 -2.737438 -0.680466<br>C -3.012856 -3.949162 -0.666701<br>C -4.026663 -1.704865 -0.569675<br>C -4.062085 -3.111150 -0.909279<br>C -3.541998 1.108568 -0.338271<br>C -4.695768 0.606050 -0.994982<br>H -5.364659 1.302498 -1.490017<br>C -4.935184 -0.751470 -1.095453<br>C -3.070160 2.463650 -0.514178<br>H 5.845486 -1.668988 -1.477265<br>H -4.923409 -3.480593 -1.456305<br>H -5.793853 -1.099807 -1.660004<br>H -3.685214 3.148751 -1.088357<br>H 2.561698 4.241740 -0.997444<br>H 4.712234 2.997848 -1.488294<br>O -1.385533 6.235076 0.669562<br>H -3.044269 -4.969442 -1.034665<br>H -0.503250 -5.071363 -0.578914<br>H 2.194812 -4.617199 -0.582514<br>H 4.558778 -3.691329 -1.050971 |
| gTS1-3 | C 2.829790 -1.367018 0.191380<br>C 2.707443 0.047329 0.380247<br>C 1.556637 0.566257 1.055578<br>C 0.596651 -0.317676 1.563539<br>C 0.708364 -1.723595 1.325898<br>C 1.761541 -2.247471 0.602510<br>C -0.774448 0.004662 1.575366<br>C -1.508247 -1.201340 1.344216                                                                                                                                                                                                                                                                                                                                                                                                                                                                                                                                                                                                                                                                                                                                                                                                                                                                                                                                                                                                                                                                                                                                                                                                                                                                                                                                                                                                                                                                                                                                                 |

|        |   |           |           |           |
|--------|---|-----------|-----------|-----------|
|        | C | -2.695584 | -1.197308 | 0.636126  |
|        | C | -3.109675 | -2.439267 | 0.024265  |
|        | C | -2.215641 | -3.524459 | -0.032349 |
|        | C | -0.867092 | -3.410185 | 0.445126  |
|        | C | -0.592957 | -2.275126 | 1.227601  |
|        | C | 1.113344  | 1.863607  | 0.757619  |
|        | C | -0.252659 | 2.171775  | 0.729541  |
|        | C | -1.233996 | 1.216996  | 1.054127  |
|        | C | -3.257561 | 0.067643  | 0.228502  |
|        | C | -2.497600 | 1.277086  | 0.396265  |
|        | C | 1.568330  | -3.542530 | -0.011148 |
|        | C | 0.282628  | -4.112539 | -0.051292 |
|        | C | -0.520798 | 3.285734  | -0.111752 |
|        | C | 1.902467  | 2.794201  | -0.010341 |
|        | C | 1.709920  | 4.500027  | 0.403409  |
|        | C | 0.801545  | 3.899969  | -0.551454 |
|        | H | 0.851628  | 4.280601  | -1.575077 |
|        | C | 3.114826  | 2.319815  | -0.555838 |
|        | C | 3.515997  | 0.955519  | -0.376167 |
|        | C | 4.613809  | 0.391519  | -1.087686 |
|        | C | 3.847351  | -1.885105 | -0.642794 |
|        | C | 4.780552  | -0.974176 | -1.199600 |
|        | H | 5.596736  | -1.361526 | -1.800723 |
|        | C | 3.793594  | -3.281445 | -1.000149 |
|        | C | 2.706724  | -4.063898 | -0.731969 |
|        | C | -4.370954 | -2.392633 | -0.681437 |
|        | C | -4.401585 | 0.066511  | -0.595069 |
|        | C | -4.992438 | -1.207146 | -0.942455 |
|        | C | -2.808081 | 2.440478  | -0.364777 |
|        | C | -4.038942 | 2.435602  | -1.070921 |
|        | H | -4.337387 | 3.326850  | -1.613206 |
|        | C | -4.817610 | 1.296378  | -1.162363 |
|        | C | -1.796710 | 3.460314  | -0.587733 |
|        | H | 4.613067  | -3.689896 | -1.582618 |
|        | H | -5.915396 | -1.202062 | -1.513131 |
|        | H | -5.721679 | 1.318441  | -1.762055 |
|        | H | -2.039066 | 4.270352  | -1.267646 |
|        | H | 3.732334  | 2.965035  | -1.170762 |
|        | H | 5.291414  | 1.055188  | -1.614502 |
|        | O | 2.433695  | 5.434558  | 0.529869  |
|        | H | -4.796146 | -3.317437 | -1.057211 |
|        | H | -2.510528 | -4.404732 | -0.595801 |
|        | H | 0.145512  | -5.029848 | -0.616141 |
|        | H | 2.666334  | -5.078456 | -1.114217 |
|        | C | 3.124501  | -0.665077 | 0.194852  |
|        | C | 2.668343  | 0.691751  | 0.318402  |
|        | C | 1.434322  | 0.952011  | 0.985763  |
|        | C | 0.704174  | -0.105034 | 1.545697  |
|        | C | 1.138928  | -1.455722 | 1.360657  |
|        | C | 2.288713  | -1.750729 | 0.652498  |
|        | C | -0.704176 | -0.105034 | 1.545696  |
|        | C | -1.138929 | -1.455722 | 1.360656  |
|        | C | -2.288713 | -1.750729 | 0.652496  |
|        | C | -2.401366 | -3.077762 | 0.089991  |
|        | C | -1.282546 | -3.930075 | 0.076745  |
|        | C | 0.000000  | -3.491877 | 0.549449  |
|        | C | -0.000001 | -2.295076 | 1.286250  |
|        | C | 0.703410  | 2.092077  | 0.624383  |
|        | C | -0.703411 | 2.092077  | 0.624382  |
|        | C | -1.434323 | 0.952011  | 0.985761  |
|        | C | -3.124501 | -0.665077 | 0.194849  |
|        | C | -2.668343 | 0.691751  | 0.318398  |
|        | C | 2.401366  | -3.077762 | 0.089994  |
|        | C | 1.282546  | -3.930075 | 0.076747  |
|        | C | -1.188301 | 3.077505  | -0.286616 |
|        | C | 1.188301  | 3.077505  | -0.286615 |
|        | C | 0.000000  | 5.422379  | 0.417786  |
|        | C | 0.000000  | 3.897948  | -0.699087 |
|        | H | 0.000001  | 4.365067  | -1.675865 |
|        | C | 2.474729  | 2.935004  | -0.765742 |
|        | C | 3.224530  | 1.722375  | -0.497863 |
|        | C | 4.412957  | 1.404008  | -1.206798 |
|        | C | 4.226963  | -0.962795 | -0.632478 |
|        | C | 4.908829  | 0.114484  | -1.251523 |
|        | H | 5.786156  | -0.096651 | -1.854066 |
|        | C | 4.504903  | -2.350253 | -0.930436 |
| gTS3-4 |   |           |           |           |

|   |           |           |           |
|---|-----------|-----------|-----------|
| C | 3.631340  | -3.350231 | -0.619733 |
| C | -3.631340 | -3.350231 | -0.619737 |
| C | -4.226963 | -0.962795 | -0.632483 |
| C | -4.504902 | -2.350253 | -0.930441 |
| C | -3.224529 | 1.722376  | -0.497867 |
| C | -4.412955 | 1.404008  | -1.206803 |
| H | -4.900075 | 2.179488  | -1.789026 |
| C | -4.908828 | 0.114484  | -1.251529 |
| C | -2.474728 | 2.935004  | -0.765745 |
| H | 5.397292  | -2.579388 | -1.503744 |
| H | -5.397290 | -2.579388 | -1.503751 |
| H | -5.786154 | -0.096651 | -1.854073 |
| H | -2.892550 | 3.636862  | -1.480435 |
| H | 2.892552  | 3.636862  | -1.480432 |
| H | 4.900077  | 2.179488  | -1.789020 |
| O | -0.000001 | 5.316400  | 1.566266  |
| H | -3.827993 | -4.361915 | -0.958921 |
| H | -1.363182 | -4.875879 | -0.450815 |
| H | 1.363182  | -4.875879 | -0.450813 |
| H | 3.827994  | -4.361915 | -0.958916 |

**Table S3.** Rate coefficients (units: s<sup>-1</sup>) of product formation from oxyradical a.

| T(K) | Reaction | P(atm)     |          |            |          |            |          | $k_{\infty}$ |
|------|----------|------------|----------|------------|----------|------------|----------|--------------|
|      |          | 0.1        |          | 1          |          | 10         |          |              |
|      |          | Eigenvalue | 1/e time | Eigenvalue | 1/e time | Eigenvalue | 1/e time |              |
| 1500 | Ra1      | 1.80E+03   | 1.80E+03 | 4.40E+03   | 4.40E+03 | 7.00E+03   | 7.00E+03 | 8.80E+03     |
|      | Ra2      | 6.10E+02   | 6.10E+02 | 1.40E+03   | 1.40E+03 | 2.10E+03   | 2.10E+03 | 2.60E+03     |
|      | Ra3      | 4.70E+02   | 4.80E+02 | 7.60E+02   | 7.60E+02 | 9.40E+02   | 9.40E+02 | 1.00E+03     |
|      | Ra4      | 2.40E+03   | 2.40E+03 | 3.90E+03   | 3.90E+03 | 4.80E+03   | 4.80E+03 | 4.90E+03     |
|      | Total    | 5.30E+03   | 5.30E+03 | 1.00E+04   | 1.00E+04 | 1.50E+04   | 1.50E+04 | 1.70E+04     |
| 1600 | Ra1      | 6.10E+03   | 6.20E+03 | 2.00E+04   | 2.00E+04 | 4.20E+04   | 4.20E+04 | 6.80E+04     |
|      | Ra2      | 2.00E+03   | 2.10E+03 | 6.20E+03   | 6.20E+03 | 1.20E+04   | 1.20E+04 | 1.90E+04     |
|      | Ra3      | 1.30E+03   | 1.40E+03 | 2.70E+03   | 2.70E+03 | 4.10E+03   | 4.10E+03 | 5.10E+03     |
|      | Ra4      | 6.80E+03   | 6.90E+03 | 1.40E+04   | 1.40E+04 | 2.10E+04   | 2.10E+04 | 2.90E+04     |
|      | Total    | 1.60E+04   | 1.70E+04 | 4.30E+04   | 4.30E+04 | 7.90E+04   | 7.90E+04 | 1.20E+05     |
| 1700 | Ra1      | 1.50E+04   | 1.60E+04 | 6.20E+04   | 6.30E+04 | 1.70E+05   | 1.70E+05 | 4.20E+05     |
|      | Ra2      | 4.80E+03   | 5.20E+03 | 1.90E+04   | 1.90E+04 | 4.90E+04   | 4.90E+04 | 1.10E+05     |
|      | Ra3      | 2.80E+03   | 3.00E+03 | 7.10E+03   | 7.30E+03 | 1.30E+04   | 1.30E+04 | 2.10E+04     |
|      | Ra4      | 1.40E+04   | 1.60E+04 | 3.60E+04   | 3.70E+04 | 6.60E+04   | 6.70E+04 | 1.10E+05     |
|      | Total    | 3.70E+04   | 4.00E+04 | 1.20E+05   | 1.30E+05 | 3.00E+05   | 3.00E+05 | 6.60E+05     |
| 1800 | Ra1      | 2.90E+04   | 3.60E+04 | 1.40E+05   | 1.50E+05 | 5.10E+05   | 5.20E+05 | 2.10E+06     |
|      | Ra2      | 9.20E+03   | 1.20E+04 | 4.30E+04   | 4.60E+04 | 1.40E+05   | 1.40E+05 | 5.40E+05     |
|      | Ra3      | 4.70E+03   | 5.90E+03 | 1.40E+04   | 1.50E+04 | 3.30E+04   | 3.40E+04 | 7.50E+04     |
|      | Ra4      | 2.40E+04   | 3.00E+04 | 7.20E+04   | 7.80E+04 | 1.60E+05   | 1.70E+05 | 3.90E+05     |
|      | Total    | 6.60E+04   | 8.40E+04 | 2.70E+05   | 2.90E+05 | 8.50E+05   | 8.60E+05 | 3.10E+06     |
| 1900 | Ra1      | 4.90E+04   | 8.20E+04 | 2.70E+05   | 3.30E+05 | 1.20E+06   | 1.20E+06 | 8.60E+06     |
|      | Ra2      | 1.50E+04   | 2.50E+04 | 7.90E+04   | 9.60E+04 | 3.20E+05   | 3.40E+05 | 2.20E+06     |
|      | Ra3      | 6.70E+03   | 1.10E+04 | 2.40E+04   | 2.90E+04 | 6.60E+04   | 6.90E+04 | 2.30E+05     |
|      | Ra4      | 3.40E+04   | 5.70E+04 | 1.20E+05   | 1.40E+05 | 3.20E+05   | 3.40E+05 | 1.20E+06     |
|      | Total    | 1.00E+05   | 1.80E+05 | 4.90E+05   | 6.00E+05 | 1.90E+06   | 2.00E+06 | 1.20E+07     |
| 2000 | Ra1      | 7.50E+04   | 2.10E+05 | 4.40E+05   | 6.70E+05 | 2.20E+06   | 2.50E+06 | 3.10E+07     |
|      | Ra2      | 2.30E+04   | 6.30E+04 | 1.30E+05   | 1.90E+05 | 5.90E+05   | 6.70E+05 | 7.50E+06     |

|      |       |          |          |          |          |          |          |          |
|------|-------|----------|----------|----------|----------|----------|----------|----------|
|      | Ra3   | 8.50E+03 | 2.40E+04 | 3.40E+04 | 5.20E+04 | 1.10E+05 | 1.30E+05 | 6.60E+05 |
|      | Ra4   | 4.30E+04 | 1.20E+05 | 1.70E+05 | 2.60E+05 | 5.40E+05 | 6.10E+05 | 3.20E+06 |
|      | Total | 1.50E+05 | 4.20E+05 | 7.80E+05 | 1.20E+06 | 3.40E+06 | 3.90E+06 | 4.20E+07 |
| 2100 | Ra1   | 1.10E+05 | 6.70E+05 | 6.60E+05 | 1.50E+06 | 3.50E+06 | 4.70E+06 | 9.70E+07 |
|      | Ra2   | 3.10E+04 | 1.90E+05 | 1.90E+05 | 4.20E+05 | 9.40E+05 | 1.30E+06 | 2.30E+07 |
|      | Ra3   | 9.70E+03 | 6.10E+04 | 4.40E+04 | 9.80E+04 | 1.60E+05 | 2.20E+05 | 1.70E+06 |
|      | Ra4   | 4.90E+04 | 3.00E+05 | 2.20E+05 | 4.80E+05 | 7.70E+05 | 1.00E+06 | 7.70E+06 |
|      | Total | 2.00E+05 | 1.20E+06 | 1.10E+06 | 2.50E+06 | 5.40E+06 | 7.30E+06 | 1.30E+08 |
| 2200 | Ra1   | 1.40E+05 | 2.60E+06 | 9.20E+05 | 3.80E+06 | 5.20E+06 | 9.30E+06 | 2.70E+08 |
|      | Ra2   | 4.10E+04 | 7.20E+05 | 2.50E+05 | 1.10E+06 | 1.40E+06 | 2.50E+06 | 6.30E+07 |
|      | Ra3   | 1.00E+04 | 1.80E+05 | 5.10E+04 | 2.10E+05 | 2.10E+05 | 3.80E+05 | 3.90E+06 |
|      | Ra4   | 5.10E+04 | 9.10E+05 | 2.50E+05 | 1.00E+06 | 1.00E+06 | 1.80E+06 | 1.70E+07 |
|      | Total | 2.50E+05 | 4.40E+06 | 1.50E+06 | 6.10E+06 | 7.80E+06 | 1.40E+07 | 3.50E+08 |
| 2300 | Ra1   | 1.90E+05 | 1.00E+07 | 1.20E+06 | 1.20E+07 | 7.20E+06 | 2.00E+07 | 6.70E+08 |
|      | Ra2   | 5.00E+04 | 2.70E+06 | 3.20E+05 | 3.10E+06 | 1.90E+06 | 5.20E+06 | 1.50E+08 |
|      | Ra3   | 1.00E+04 | 5.60E+05 | 5.60E+04 | 5.40E+05 | 2.50E+05 | 7.10E+05 | 8.40E+06 |
|      | Ra4   | 5.10E+04 | 2.80E+06 | 2.70E+05 | 2.60E+06 | 1.20E+06 | 3.30E+06 | 3.60E+07 |
|      | Total | 3.00E+05 | 1.60E+07 | 1.90E+06 | 1.80E+07 | 1.10E+07 | 2.90E+07 | 8.60E+08 |
| 2400 | Ra1   | 2.30E+05 | 3.60E+07 | 1.50E+06 | 3.80E+07 | 9.30E+06 | 4.90E+07 | 1.50E+09 |
|      | Ra2   | 6.00E+04 | 9.50E+06 | 4.00E+05 | 1.00E+07 | 2.40E+06 | 1.20E+07 | 3.40E+08 |
|      | Ra3   | 1.00E+04 | 1.60E+06 | 5.80E+04 | 1.50E+06 | 2.90E+05 | 1.50E+06 | 1.70E+07 |
|      | Ra4   | 4.80E+04 | 7.60E+06 | 2.70E+05 | 6.90E+06 | 1.30E+06 | 6.90E+06 | 7.00E+07 |
|      | Total | 3.50E+05 | 5.50E+07 | 2.30E+06 | 5.70E+07 | 1.30E+07 | 7.00E+07 | 1.90E+09 |
| 2500 | Ra1   | 2.70E+05 | 1.20E+08 | 1.90E+06 | 1.20E+08 | 1.20E+07 | 1.30E+08 | 3.10E+09 |
|      | Ra2   | 7.00E+04 | 3.00E+07 | 4.70E+05 | 3.00E+07 | 2.90E+06 | 3.30E+07 | 6.90E+08 |
|      | Ra3   | 9.40E+03 | 4.00E+06 | 5.70E+04 | 3.70E+06 | 3.10E+05 | 3.50E+06 | 3.10E+07 |
|      | Ra4   | 4.40E+04 | 1.90E+07 | 2.70E+05 | 1.70E+07 | 1.40E+06 | 1.60E+07 | 1.30E+08 |
|      | Total | 4.00E+05 | 1.70E+08 | 2.60E+06 | 1.70E+08 | 1.60E+07 | 1.80E+08 | 3.90E+09 |

**Table S4.** Rate coefficients (units: s<sup>-1</sup>) of product formation from oxyradical b.

| T(K) | Reaction | P(atm)     |          |            |          |            |          | $k_{\infty}$ |
|------|----------|------------|----------|------------|----------|------------|----------|--------------|
|      |          | 0.1        |          | 1          |          | 10         |          |              |
|      |          | Eigenvalue | 1/e time | Eigenvalue | 1/e time | Eigenvalue | 1/e time |              |
| 1500 | Rb1      | 1.8E+03    | 1.8E+03  | 2.4E+03    | 2.4E+03  | 2.6E+03    | 2.6E+03  | 2.7E+03      |
|      | Rb2      | 1.5E+03    | 1.5E+03  | 2.0E+03    | 2.0E+03  | 2.2E+03    | 2.2E+03  | 2.3E+03      |
|      | Total    | 3.3E+03    | 3.3E+03  | 4.5E+03    | 4.5E+03  | 4.8E+03    | 4.8E+03  | 4.9E+03      |
| 1600 | Rb1      | 5.7E+03    | 5.8E+03  | 9.9E+03    | 9.9E+03  | 1.2E+04    | 1.2E+04  | 1.2E+04      |
|      | Rb2      | 4.7E+03    | 4.8E+03  | 7.9E+03    | 7.9E+03  | 9.2E+03    | 9.2E+03  | 9.8E+03      |
|      | Total    | 1.0E+04    | 1.1E+04  | 1.8E+04    | 1.8E+04  | 2.1E+04    | 2.1E+04  | 2.2E+04      |
| 1700 | Rb1      | 1.4E+04    | 1.4E+04  | 3.1E+04    | 3.1E+04  | 4.3E+04    | 4.3E+04  | 4.7E+04      |
|      | Rb2      | 1.1E+04    | 1.2E+04  | 2.3E+04    | 2.3E+04  | 3.2E+04    | 3.2E+04  | 3.5E+04      |
|      | Total    | 2.5E+04    | 2.6E+04  | 5.4E+04    | 5.4E+04  | 7.4E+04    | 7.4E+04  | 8.2E+04      |
| 1800 | Rb1      | 2.6E+04    | 3.0E+04  | 7.4E+04    | 7.6E+04  | 1.3E+05    | 1.3E+05  | 1.5E+05      |
|      | Rb2      | 2.1E+04    | 2.4E+04  | 5.5E+04    | 5.6E+04  | 8.9E+04    | 8.9E+04  | 1.1E+05      |
|      | Total    | 4.7E+04    | 5.4E+04  | 1.3E+05    | 1.3E+05  | 2.2E+05    | 2.2E+05  | 2.6E+05      |

|      |       |         |         |         |         |         |         |         |
|------|-------|---------|---------|---------|---------|---------|---------|---------|
| 1900 | Rb1   | 4.4E+04 | 5.9E+04 | 1.5E+05 | 1.6E+05 | 3.1E+05 | 3.2E+05 | 4.4E+05 |
|      | Rb2   | 3.4E+04 | 4.5E+04 | 1.1E+05 | 1.1E+05 | 2.1E+05 | 2.1E+05 | 2.9E+05 |
|      | Total | 7.7E+04 | 1.0E+05 | 2.5E+05 | 2.7E+05 | 5.2E+05 | 5.3E+05 | 7.3E+05 |
| 2000 | Rb1   | 6.5E+04 | 1.2E+05 | 2.5E+05 | 2.9E+05 | 6.6E+05 | 6.7E+05 | 1.1E+06 |
|      | Rb2   | 4.8E+04 | 8.8E+04 | 1.8E+05 | 2.0E+05 | 4.2E+05 | 4.3E+05 | 7.0E+05 |
|      | Total | 1.1E+05 | 2.1E+05 | 4.3E+05 | 5.0E+05 | 1.1E+06 | 1.1E+06 | 1.9E+06 |
| 2100 | Rb1   | 8.9E+04 | 2.6E+05 | 3.9E+05 | 5.3E+05 | 1.2E+06 | 1.3E+06 | 2.7E+06 |
|      | Rb2   | 6.4E+04 | 1.8E+05 | 2.6E+05 | 3.6E+05 | 7.3E+05 | 7.8E+05 | 1.6E+06 |
|      | Total | 1.5E+05 | 4.4E+05 | 6.5E+05 | 8.9E+05 | 1.9E+06 | 2.0E+06 | 4.3E+06 |
| 2200 | Rb1   | 1.2E+05 | 6.0E+05 | 5.5E+05 | 9.8E+05 | 1.9E+06 | 2.2E+06 | 5.9E+06 |
|      | Rb2   | 8.0E+04 | 4.1E+05 | 3.6E+05 | 6.3E+05 | 1.2E+06 | 1.3E+06 | 3.2E+06 |
|      | Total | 2.0E+05 | 1.0E+06 | 9.1E+05 | 1.6E+06 | 3.1E+06 | 3.5E+06 | 9.1E+06 |
| 2300 | Rb1   | 1.5E+05 | 1.5E+06 | 7.3E+05 | 1.9E+06 | 2.9E+06 | 3.6E+06 | 1.2E+07 |
|      | Rb2   | 9.5E+04 | 9.4E+05 | 4.6E+05 | 1.2E+06 | 1.7E+06 | 2.1E+06 | 6.1E+06 |
|      | Total | 2.4E+05 | 2.4E+06 | 1.2E+06 | 3.1E+06 | 4.5E+06 | 5.7E+06 | 1.8E+07 |
| 2400 | Rb1   | 1.8E+05 | 3.3E+06 | 9.3E+05 | 3.8E+06 | 4.0E+06 | 6.1E+06 | 2.3E+07 |
|      | Rb2   | 1.1E+05 | 2.1E+06 | 5.6E+05 | 2.3E+06 | 2.2E+06 | 3.4E+06 | 1.1E+07 |
|      | Total | 2.9E+05 | 5.4E+06 | 1.5E+06 | 6.1E+06 | 6.2E+06 | 9.4E+06 | 3.4E+07 |
| 2500 | Rb1   | 2.1E+05 | 7.2E+06 | 1.2E+06 | 7.7E+06 | 5.2E+06 | 1.0E+07 | 4.1E+07 |
|      | Rb2   | 1.2E+05 | 4.2E+06 | 6.5E+05 | 4.3E+06 | 2.8E+06 | 5.5E+06 | 1.8E+07 |
|      | Total | 3.3E+05 | 1.1E+07 | 1.8E+06 | 1.2E+07 | 8.0E+06 | 1.6E+07 | 5.9E+07 |

**Table S5.** Rate coefficients (units: s<sup>-1</sup>) of product formation from oxyradical c.

| T(K) | P(atm)         |             |                |             |                |             | $k_{\infty}$ |
|------|----------------|-------------|----------------|-------------|----------------|-------------|--------------|
|      | 0.1            |             | 1              |             | 10             |             |              |
|      | Eigenvalu<br>e | 1/e<br>time | Eigenvalu<br>e | 1/e<br>time | Eigenvalu<br>e | 1/e<br>time |              |
| 1500 | 7.4E+02        | 7.4E+02     | 9.0E+02        | 9.0E+02     | 9.4E+02        | 9.4E+02     | 9.6E+02      |
| 1600 | 3.1E+03        | 3.1E+03     | 4.6E+03        | 4.6E+03     | 5.2E+03        | 5.2E+03     | 5.4E+03      |
| 1700 | 9.3E+03        | 9.4E+03     | 1.8E+04        | 1.8E+04     | 2.3E+04        | 2.3E+04     | 2.5E+04      |
| 1800 | 2.1E+04        | 2.2E+04     | 5.2E+04        | 5.3E+04     | 8.2E+04        | 8.2E+04     | 9.6E+04      |
| 1900 | 4.0E+04        | 4.5E+04     | 1.2E+05        | 1.2E+05     | 2.4E+05        | 2.4E+05     | 3.2E+05      |
| 2000 | 6.4E+04        | 8.7E+04     | 2.3E+05        | 2.5E+05     | 5.6E+05        | 5.6E+05     | 9.6E+05      |
| 2100 | 9.4E+04        | 1.7E+05     | 3.9E+05        | 4.6E+05     | 1.1E+06        | 1.2E+06     | 2.6E+06      |
| 2200 | 1.3E+05        | 3.6E+05     | 5.8E+05        | 8.2E+05     | 2.0E+06        | 2.1E+06     | 6.3E+06      |
| 2300 | 1.6E+05        | 8.6E+05     | 8.0E+05        | 1.5E+06     | 3.1E+06        | 3.6E+06     | 1.4E+07      |
| 2400 | 2.0E+05        | 2.2E+06     | 1.0E+06        | 2.9E+06     | 4.4E+06        | 6.0E+06     | 3.0E+07      |
| 2500 | 2.4E+05        | 5.3E+06     | 1.3E+06        | 6.1E+06     | 5.9E+06        | 1.0E+07     | 5.9E+07      |

**Table S6.** Rate coefficients (units: s<sup>-1</sup>) of product formation from oxyradical d.

| T(K) | P(atm)         |             |                |             |                |             | $k_{\infty}$ |
|------|----------------|-------------|----------------|-------------|----------------|-------------|--------------|
|      | 0.1            |             | 1              |             | 10             |             |              |
|      | Eigenvalu<br>e | 1/e<br>time | Eigenvalu<br>e | 1/e<br>time | Eigenvalu<br>e | 1/e<br>time |              |
| 1500 | 5.4E+02        | 5.4E+02     | 6.3E+02        | 6.3E+02     | 6.5E+02        | 6.5E+02     | 6.6E+02      |
| 1600 | 2.3E+03        | 2.3E+03     | 3.3E+03        | 3.3E+03     | 3.6E+03        | 3.6E+03     | 3.7E+03      |
| 1700 | 7.3E+03        | 7.4E+03     | 1.3E+04        | 1.3E+04     | 1.6E+04        | 1.6E+04     | 1.7E+04      |
| 1800 | 1.7E+04        | 1.8E+04     | 4.0E+04        | 4.0E+04     | 5.8E+04        | 5.8E+04     | 6.5E+04      |
| 1900 | 3.4E+04        | 3.7E+04     | 9.5E+04        | 9.7E+04     | 1.7E+05        | 1.7E+05     | 2.2E+05      |
| 2000 | 5.6E+04        | 7.1E+04     | 1.9E+05        | 2.0E+05     | 4.2E+05        | 4.2E+05     | 6.4E+05      |
| 2100 | 8.2E+04        | 1.4E+05     | 3.2E+05        | 3.7E+05     | 8.7E+05        | 8.9E+05     | 1.7E+06      |
| 2200 | 1.1E+05        | 2.8E+05     | 4.9E+05        | 6.5E+05     | 1.6E+06        | 1.7E+06     | 4.2E+06      |
| 2300 | 1.5E+05        | 6.2E+05     | 7.0E+05        | 1.2E+06     | 2.5E+06        | 2.9E+06     | 9.4E+06      |
| 2400 | 1.8E+05        | 1.5E+06     | 9.2E+05        | 2.2E+06     | 3.7E+06        | 4.7E+06     | 2.0E+07      |
| 2500 | 2.2E+05        | 3.7E+06     | 1.2E+06        | 4.4E+06     | 5.1E+06        | 7.8E+06     | 3.9E+07      |

**Table S7.** Rate coefficients (units: s<sup>-1</sup>) of product formation from oxyradical e.

| T(K) | P(atm)         |             |                |             |                |             | $k_{\infty}$ |
|------|----------------|-------------|----------------|-------------|----------------|-------------|--------------|
|      | 0.1            |             | 1              |             | 10             |             |              |
|      | Eigenvalu<br>e | 1/e<br>time | Eigenvalu<br>e | 1/e<br>time | Eigenvalu<br>e | 1/e<br>time |              |
| 1500 | 9.3E+02        | 9.3E+02     | 1.2E+03        | 1.2E+03     | 1.2E+03        | 1.2E+03     | 1.2E+03      |
| 1600 | 3.7E+03        | 3.8E+03     | 5.7E+03        | 5.7E+03     | 6.4E+03        | 6.4E+03     | 6.6E+03      |
| 1700 | 1.1E+04        | 1.1E+04     | 2.1E+04        | 2.1E+04     | 2.7E+04        | 2.7E+04     | 2.9E+04      |
| 1800 | 2.4E+04        | 2.5E+04     | 6.0E+04        | 6.0E+04     | 9.4E+04        | 9.4E+04     | 1.1E+05      |
| 1900 | 4.4E+04        | 5.1E+04     | 1.4E+05        | 1.4E+05     | 2.6E+05        | 2.6E+05     | 3.6E+05      |
| 2000 | 7.0E+04        | 9.7E+04     | 2.5E+05        | 2.8E+05     | 6.1E+05        | 6.2E+05     | 1.0E+06      |
| 2100 | 1.0E+05        | 1.9E+05     | 4.2E+05        | 5.0E+05     | 1.2E+06        | 1.3E+06     | 2.7E+06      |
| 2200 | 1.4E+05        | 4.2E+05     | 6.2E+05        | 8.9E+05     | 2.1E+06        | 2.3E+06     | 6.4E+06      |
| 2300 | 1.7E+05        | 1.0E+06     | 8.5E+05        | 1.7E+06     | 3.2E+06        | 3.8E+06     | 1.4E+07      |
| 2400 | 2.1E+05        | 2.5E+06     | 1.1E+06        | 3.2E+06     | 4.6E+06        | 6.4E+06     | 2.9E+07      |
| 2500 | 2.5E+05        | 6.0E+06     | 1.4E+06        | 6.7E+06     | 6.2E+06        | 1.1E+07     | 5.7E+07      |

**Table S8.** Rate coefficients (units: s<sup>-1</sup>) of product formation from oxyradical f.

| T(K) | P(atm)         |             |                |             |                |             | $k_{\infty}$ |
|------|----------------|-------------|----------------|-------------|----------------|-------------|--------------|
|      | 0.1            |             | 1              |             | 10             |             |              |
|      | Eigenvalu<br>e | 1/e<br>time | Eigenvalu<br>e | 1/e<br>time | Eigenvalu<br>e | 1/e<br>time |              |
| 1500 | 9.7E+02        | 9.7E+02     | 1.1E+03        | 1.2E+03     | 1.2E+03        | 1.2E+03     | 1.2E+03      |
| 1600 | 3.9E+03        | 3.9E+03     | 5.5E+03        | 5.6E+03     | 5.9E+03        | 6.1E+03     | 6.3E+03      |
| 1700 | 1.2E+04        | 1.2E+04     | 2.1E+04        | 2.1E+04     | 2.4E+04        | 2.6E+04     | 2.7E+04      |
| 1800 | 2.6E+04        | 2.7E+04     | 6.0E+04        | 6.0E+04     | 8.2E+04        | 8.8E+04     | 1.0E+05      |
| 1900 | 4.7E+04        | 5.4E+04     | 1.4E+05        | 1.4E+05     | 2.3E+05        | 2.5E+05     | 3.2E+05      |
| 2000 | 7.6E+04        | 1.1E+05     | 2.6E+05        | 2.8E+05     | 5.4E+05        | 5.9E+05     | 9.1E+05      |
| 2100 | 1.1E+05        | 2.1E+05     | 4.3E+05        | 5.1E+05     | 1.1E+06        | 1.2E+06     | 2.4E+06      |
| 2200 | 1.5E+05        | 4.7E+05     | 6.4E+05        | 9.3E+05     | 1.9E+06        | 2.2E+06     | 5.6E+06      |
| 2300 | 1.9E+05        | 1.1E+06     | 8.8E+05        | 1.7E+06     | 3.0E+06        | 3.8E+06     | 1.2E+07      |
| 2400 | 2.3E+05        | 2.8E+06     | 1.1E+06        | 3.4E+06     | 4.3E+06        | 6.3E+06     | 2.4E+07      |
| 2500 | 2.7E+05        | 6.4E+06     | 1.4E+06        | 7.0E+06     | 5.8E+06        | 1.1E+07     | 4.6E+07      |

**Table S9.** Rate coefficients (units: s<sup>-1</sup>) of product formation from oxyradical g.

| T(K) | P(atm)         |             |                |             |                |             | $k_{\infty}$ |
|------|----------------|-------------|----------------|-------------|----------------|-------------|--------------|
|      | 0.1            |             | 1              |             | 10             |             |              |
|      | Eigenvalu<br>e | 1/e<br>time | Eigenvalu<br>e | 1/e<br>time | Eigenvalu<br>e | 1/e<br>time |              |
| 1500 | 1.4E+04        | 1.4E+04     | 2.0E+04        | 2.0E+04     | 2.1E+04        | 2.1E+04     | 2.2E+04      |
| 1600 | 3.9E+04        | 4.2E+04     | 7.5E+04        | 7.5E+04     | 9.2E+04        | 9.2E+04     | 9.8E+04      |
| 1700 | 8.2E+04        | 1.1E+05     | 2.1E+05        | 2.1E+05     | 3.2E+05        | 3.2E+05     | 3.7E+05      |
| 1800 | 1.4E+05        | 2.7E+05     | 4.5E+05        | 5.1E+05     | 8.8E+05        | 8.9E+05     | 1.2E+06      |
| 1900 | 2.1E+05        | 7.6E+05     | 7.9E+05        | 1.1E+06     | 2.0E+06        | 2.1E+06     | 3.3E+06      |
| 2000 | 2.9E+05        | 2.2E+06     | 1.2E+06        | 2.6E+06     | 3.7E+06        | 4.2E+06     | 8.5E+06      |
| 2100 | 3.7E+05        | 5.7E+06     | 1.7E+06        | 6.1E+06     | 6.1E+06        | 8.4E+06     | 2.0E+07      |
| 2200 | 4.5E+05        | 1.4E+07     | 2.3E+06        | 1.4E+07     | 9.0E+06        | 1.7E+07     | 4.3E+07      |
| 2300 | 5.4E+05        | 3.1E+07     | 2.9E+06        | 3.1E+07     | 1.2E+07        | 3.4E+07     | 8.6E+07      |
| 2400 | 6.2E+05        | 6.5E+07     | 3.5E+06        | 6.5E+07     | 1.6E+07        | 6.7E+07     | 1.6E+08      |
| 2500 | 7.0E+05        | 1.3E+08     | 4.0E+06        | 1.3E+08     | 2.0E+07        | 1.3E+08     | 2.9E+08      |





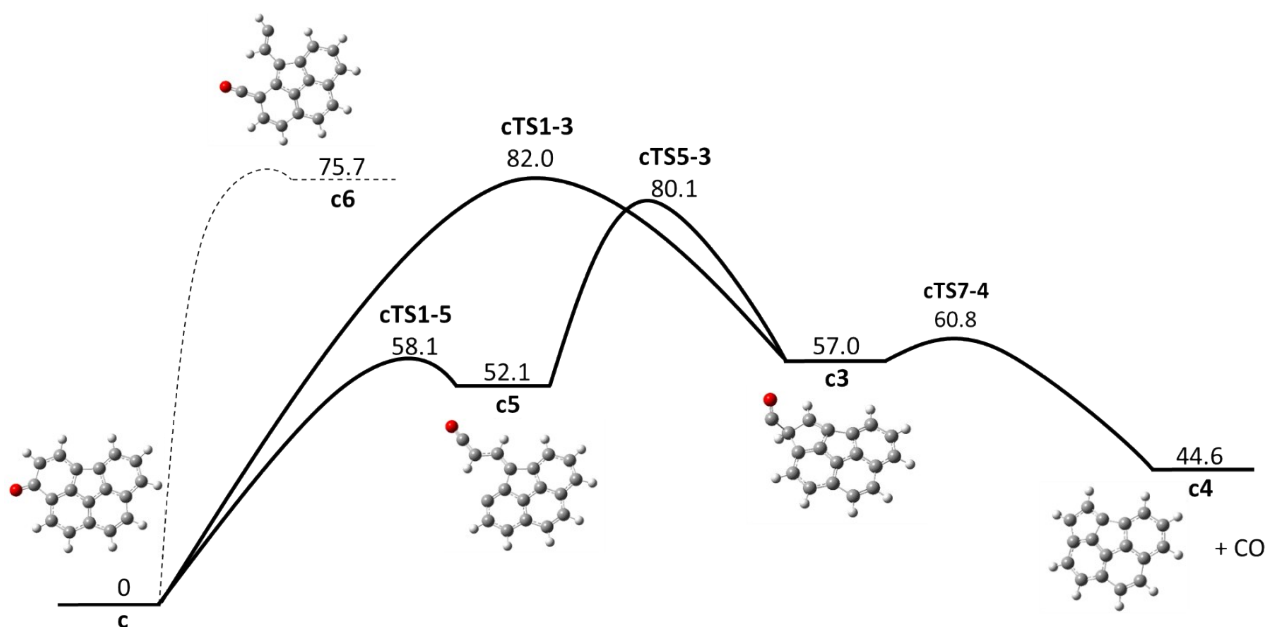

Figure S1 Potential energy surface of oxyradical c calculated at B3LYP/6-311G(d,p) level at 0 K (units: kcal/mol).

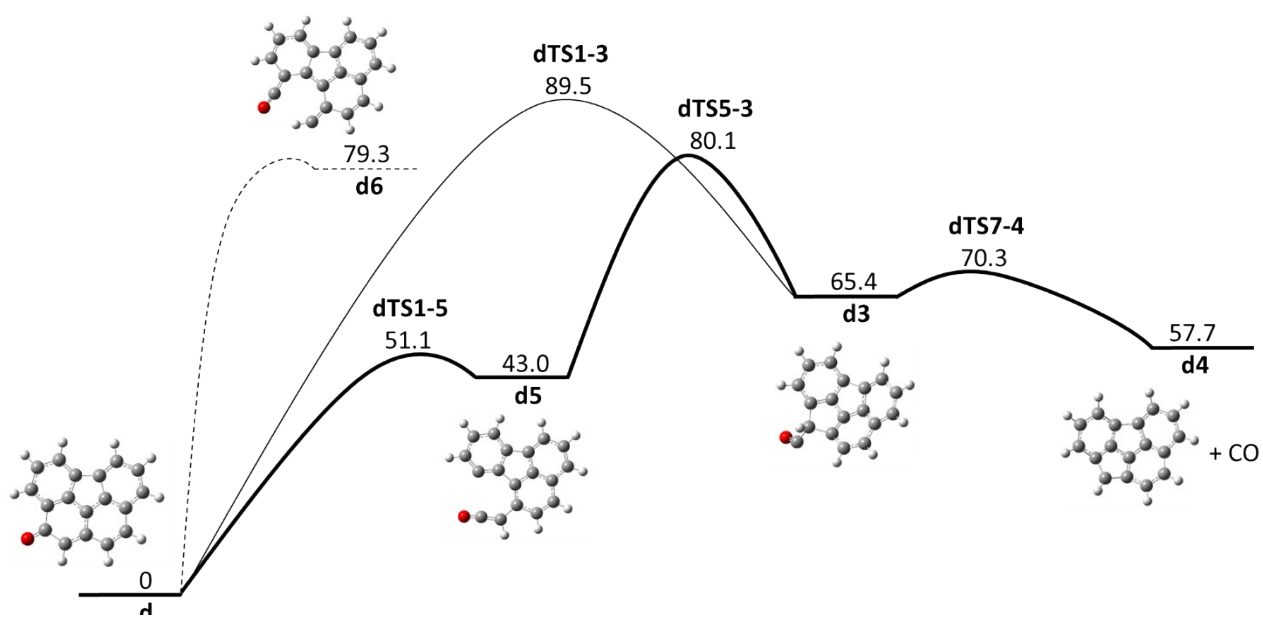

Figure S2 Potential energy surface of oxyradical d calculated at B3LYP/6-311G(d,p) level at 0 K (units: kcal/mol).

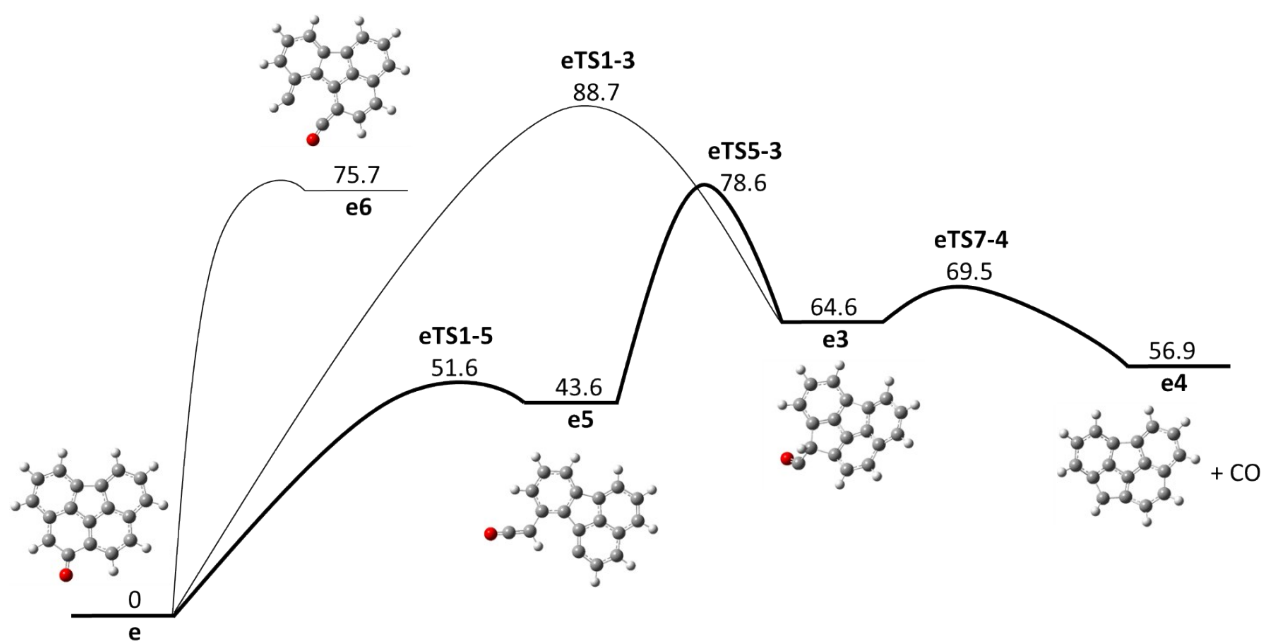

Figure S3 Potential energy surface of oxyl radical *e* calculated at B3LYP/6-311G(d,p) level at 0 K (units: kcal/mol).

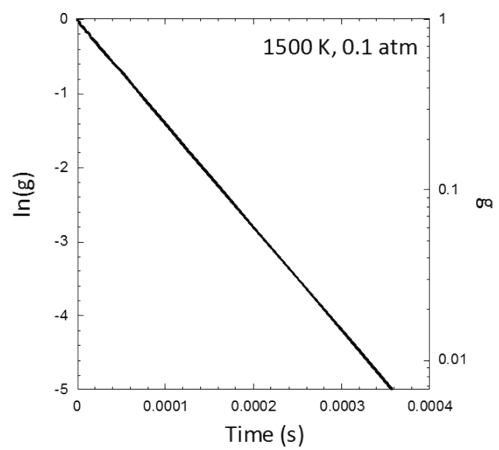

(a)

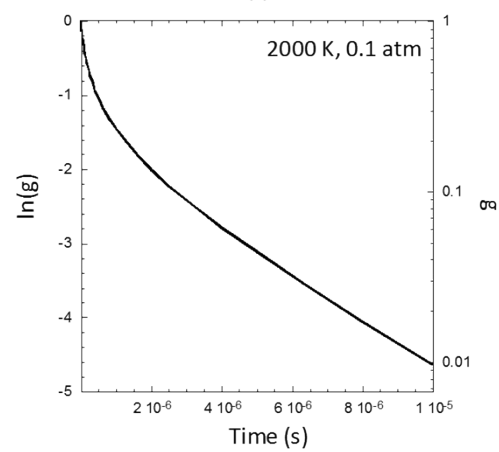

(b)

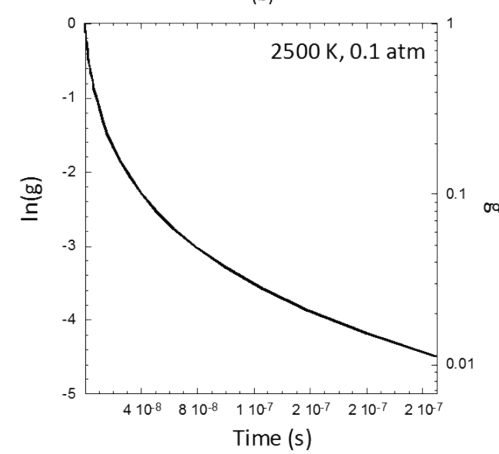

(c)

Figure S4 ln (concentration fraction)s as functions of time for oxyradical g at 0.1 atm, (a) 1500 K, (b) 2000 K, (c) 2500 K.

By solving the master equations, we obtain the eigenvalues and the species concentration profiles, from which the effective decomposition rate coefficients of oxyradical g can be determined using three different methods:

- Fitting method:** the effective rate constant is the slope from fitting  $\ln[g]$  vs. time, where  $[g]$  is the concentration of the reactant. Fig S5 shows such a fit for  $[g]$  over the range 0.95 to 0.05;
- Eigenvalue method:** use the modulus of the lowest magnitude eigenvalue as the rate constant;
- 1/e time method:** use the reciprocal of time at  $[g]$  equal to  $1/e$  as the rate constant.

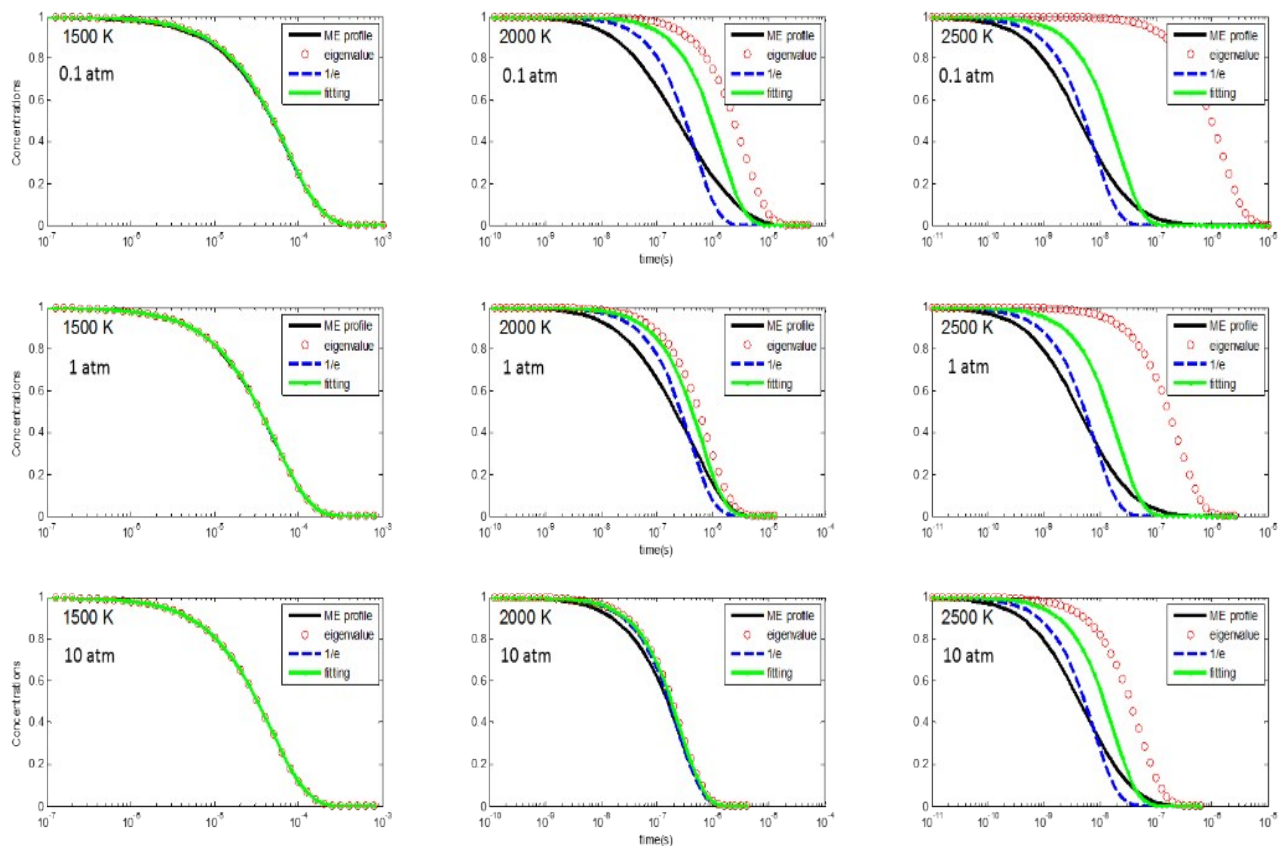

Figure S5 Comparison of concentration profiles of the reactant (oxyradical g) from the master equation modelling with those from the fitting formula  $e^{-kt}$ , where  $k$  is the effective rate constant derived from three different methods.

Figure S5 shows the comparison of concentration profiles of the reactant (oxyradical g) from the master equation modelling with those from the fitting formula  $e^{-kt}$ , using three different  $k$  over 1500-2500 K and 0.1-10 atm, where  $k$  is the effective rate constant. As can be seen that, at 1500 K, the species profiles from the fitting formulas  $e^{-kt}$  are almost identical to those from the master equation modelling, while they differ from each other at 2000 and 2500 K. Among the three methods, the 1/e time method produces concentration profile the closest to the master equation modelling results. The problem of providing a reasonable measure of the rate constant for use in combustion models will be discussed in a future publication.

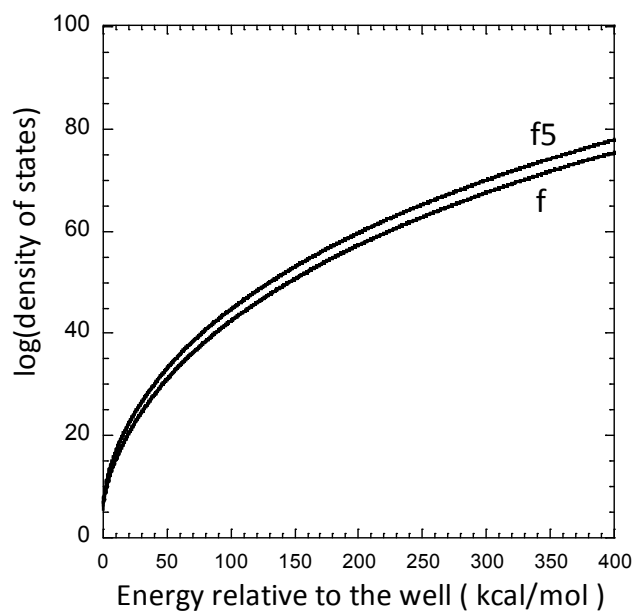

Figure S6 Densities of states as functions of energy, (a) f, (b) f5.

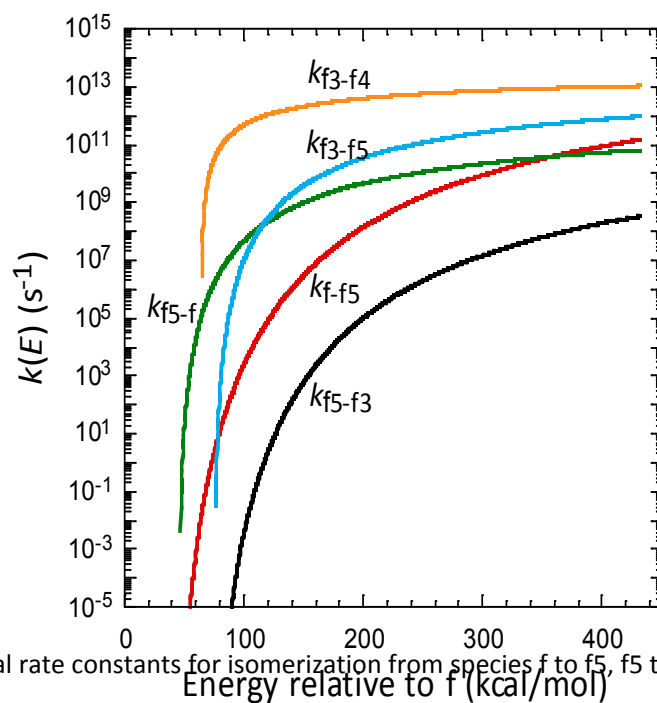

Figure S7 Microcanonical rate constants for isomerization from species f to f5, f5 to f, f5 to f3, and f3-f4.

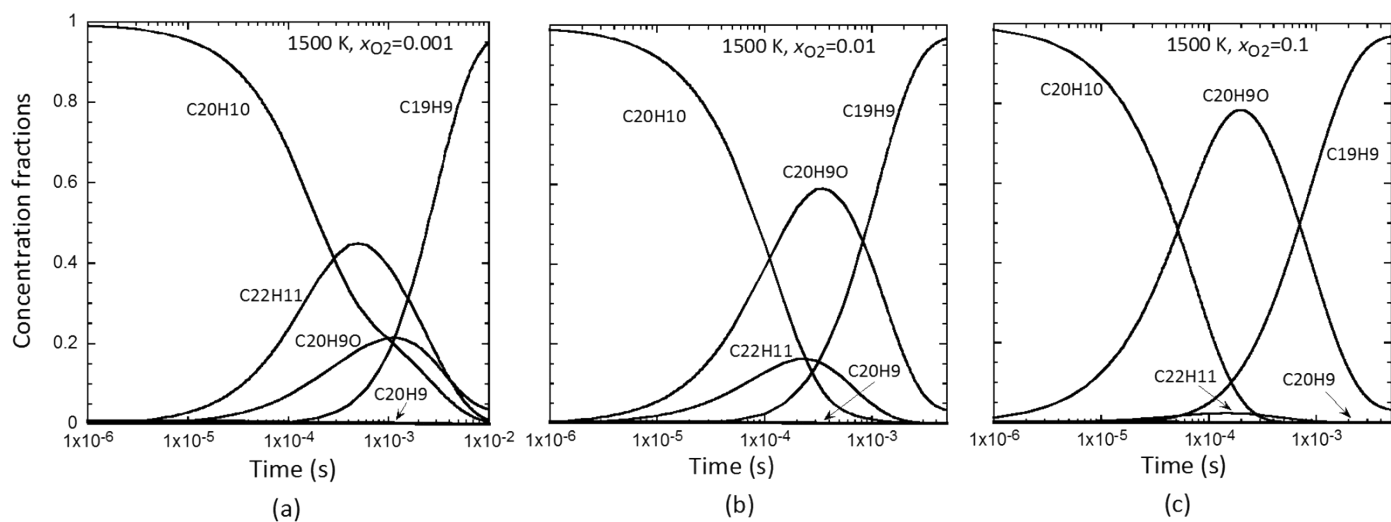

Figure S8 Concentration profiles from the kinetic modelling at 1500 K, (a)  $x_{O_2}=0.001$ , (b)  $x_{O_2}=0.01$ , (c)  $x_{O_2}=0.1$ .

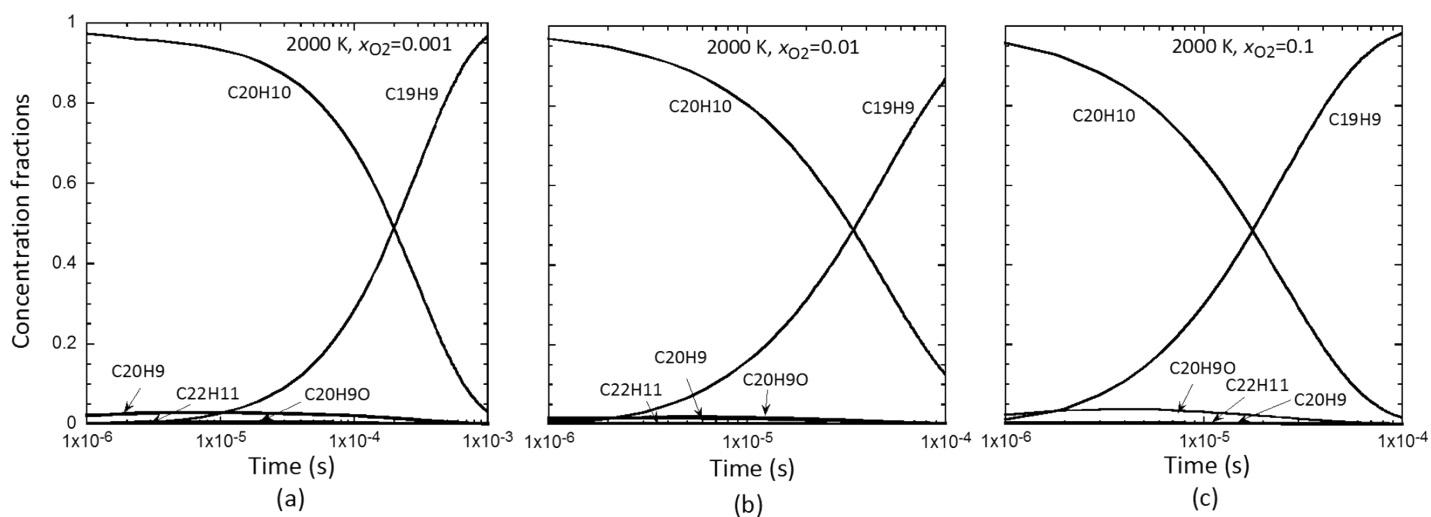

Figure S9 Concentration profiles from the kinetic modelling at 2000 K, (a)  $x_{O_2}=0.001$ , (b)  $x_{O_2}=0.01$ , (c)  $x_{O_2}=0.1$ .

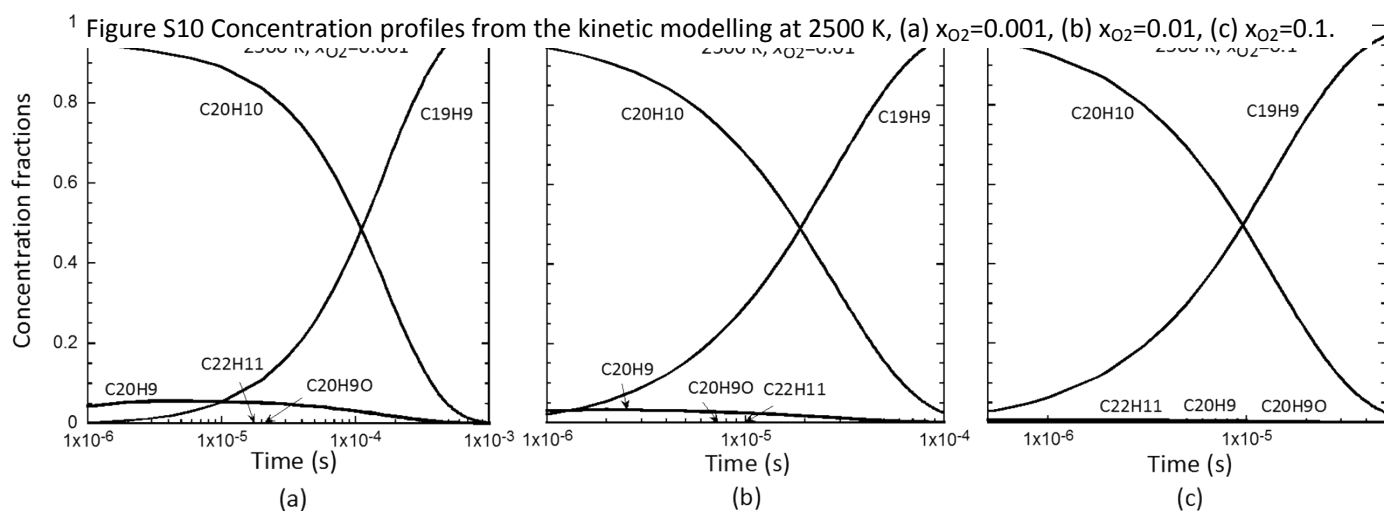

Figure S10 Concentration profiles from the kinetic modelling at 2500 K, (a)  $x_{O_2}=0.001$ , (b)  $x_{O_2}=0.01$ , (c)  $x_{O_2}=0.1$ .

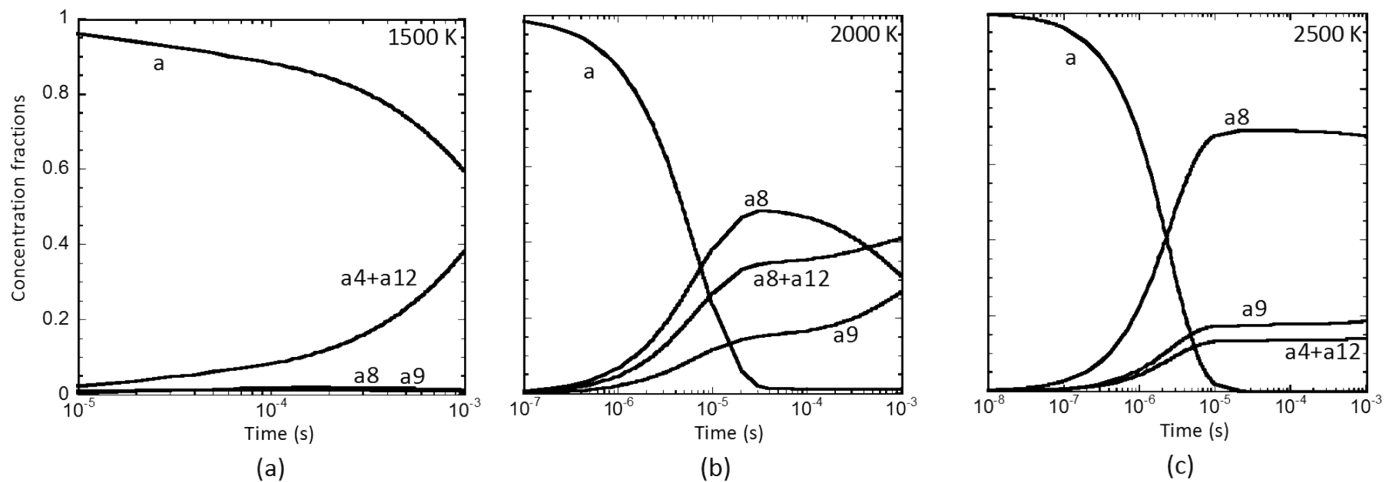

Figure S11 Concentration profiles from the kinetic modelling of oxyradical a at 0.1 atm, (a) 1500 K, (b) 2500 K, (c) 2500 K.

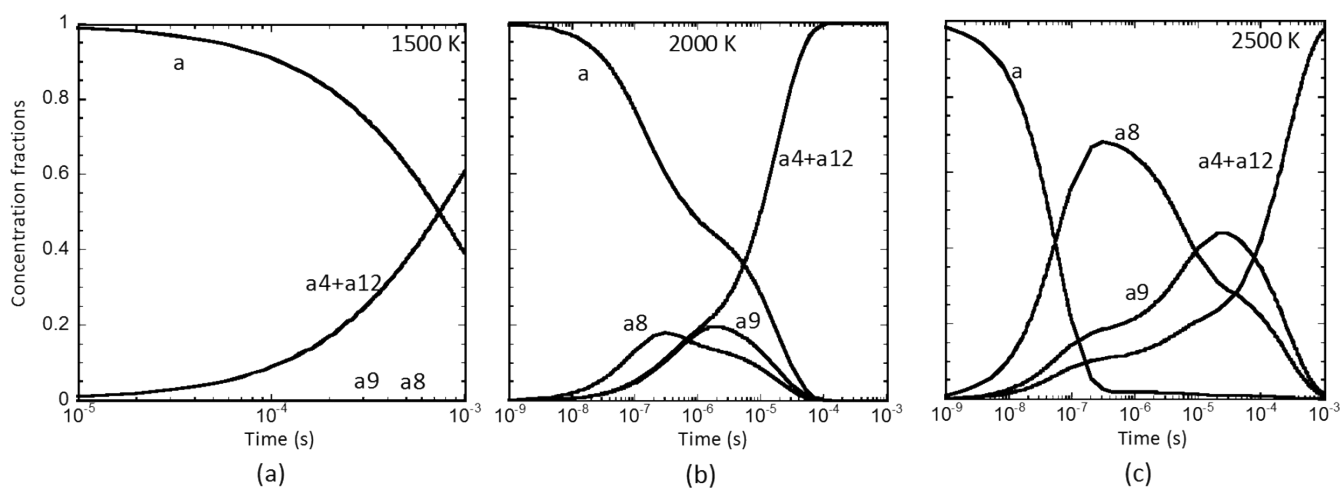

Figure S12 Concentration profiles from the kinetic modelling of oxyradical a at 10 atm, (a) 1500 K, (b) 2500 K, (c) 2500 K.
